# Supplementary material for: Genomic divergence of zebu and taurine cattle identified through high-density SNP genotyping
Source: PubMed Central journal article supplement (PMC4046821; doi:10.1186/1471-2164-14-876), 2013-12-13
Supplement: 12864_2012_5571_MOESM3_ESM.pdf [file 12864_2012_5571_MOESM3_ESM.pdf]

**Supplementary table 1. Wright's F-statistics FIS and pair-wise FST between cattle breeds based on 768,506 SNP genotypes.**

|                      | FIS     | Pair-wise FST |             |           |        |          |        |          |          |        |          |        |               |           |
|----------------------|---------|---------------|-------------|-----------|--------|----------|--------|----------|----------|--------|----------|--------|---------------|-----------|
|                      |         | Angus         | Brown Swiss | Charolais | Gir    | Guernsey | Guzera | Hereford | Holstein | Jersey | Limousin | Nelore | Norwegian Red | Red Angus |
| <b>Angus</b>         | 0.0129  | 0             | 0.1585      | 0.0847    | 0.4331 | 0.1467   | 0.4109 | 0.1522   | 0.1127   | 0.1750 | 0.0983   | 0.4436 | 0.0975        | 0.0237    |
| <b>Brown Swiss</b>   | -0.0410 | 0.1585        | 0           | 0.1066    | 0.4627 | 0.1704   | 0.4430 | 0.1833   | 0.1477   | 0.1971 | 0.1108   | 0.4687 | 0.1438        | 0.1648    |
| <b>Charolais</b>     | 0.0125  | 0.0847        | 0.1066      | 0         | 0.4025 | 0.1021   | 0.3759 | 0.1151   | 0.0825   | 0.1331 | 0.0425   | 0.4162 | 0.0668        | 0.0814    |
| <b>Gir</b>           | 0.0054  | 0.4331        | 0.4627      | 0.4025    | 0      | 0.4638   | 0.0537 | 0.4715   | 0.4180   | 0.4725 | 0.4113   | 0.0672 | 0.4458        | 0.4628    |
| <b>Guernsey</b>      | 0.0212  | 0.1467        | 0.1704      | 0.1021    | 0.4638 | 0        | 0.4430 | 0.1675   | 0.1341   | 0.1691 | 0.1096   | 0.4703 | 0.1295        | 0.1507    |
| <b>Guzera</b>        | 0.0020  | 0.4109        | 0.4430      | 0.3759    | 0.0537 | 0.4430   | 0      | 0.4444   | 0.3968   | 0.4547 | 0.3873   | 0.0654 | 0.4211        | 0.4407    |
| <b>Hereford</b>      | 0.0761  | 0.1522        | 0.1833      | 0.1151    | 0.4715 | 0.1675   | 0.4444 | 0        | 0.1537   | 0.1997 | 0.1319   | 0.4869 | 0.1320        | 0.1435    |
| <b>Holstein</b>      | -0.0081 | 0.1127        | 0.1477      | 0.0825    | 0.4180 | 0.1341   | 0.3968 | 0.1537   | 0        | 0.1615 | 0.0953   | 0.4298 | 0.0864        | 0.1149    |
| <b>Jersey</b>        | -0.0062 | 0.1750        | 0.1971      | 0.1331    | 0.4725 | 0.1691   | 0.4547 | 0.1997   | 0.1615   | 0      | 0.1392   | 0.4789 | 0.1617        | 0.1825    |
| <b>Limousin</b>      | 0.0040  | 0.0983        | 0.1108      | 0.0425    | 0.4113 | 0.1096   | 0.3873 | 0.1319   | 0.0953   | 0.1392 | 0        | 0.4242 | 0.0849        | 0.0986    |
| <b>Nelore</b>        | -0.0018 | 0.4436        | 0.4687      | 0.4162    | 0.0672 | 0.4703   | 0.0654 | 0.4869   | 0.4298   | 0.4789 | 0.4242   | 0      | 0.4539        | 0.4673    |
| <b>Norwegian Red</b> | -0.0075 | 0.0975        | 0.1438      | 0.0668    | 0.4458 | 0.1295   | 0.4211 | 0.1320   | 0.0864   | 0.1617 | 0.0849   | 0.4539 | 0             | 0.0981    |
| <b>Red Angus</b>     | -0.0035 | 0.0237        | 0.1648      | 0.0814    | 0.4628 | 0.1507   | 0.4407 | 0.1435   | 0.1149   | 0.1825 | 0.0986   | 0.4673 | 0.0981        | 0         |
