# Supplementary material for: Genomic divergence of zebu and taurine cattle identified through high-density SNP genotyping
Source: PubMed Central journal article supplement (PMC4046821; doi:10.1186/1471-2164-14-876), 2013-12-13
Supplement: 12864_2012_5571_MOESM5_ESM.pdf [file 12864_2012_5571_MOESM5_ESM.pdf]

**Supplementary table 2. Average FST per chromosome for each analyses.**

| BTA | FST zebu vs taurine |       | FST within zebu breeds |        |       |        | FST within taurine breeds |       |             |           |          |          |          |        |          |               |
|-----|---------------------|-------|------------------------|--------|-------|--------|---------------------------|-------|-------------|-----------|----------|----------|----------|--------|----------|---------------|
|     | N_SNP               | FST   | N_SNP                  | Nelore | Gir   | Guzera | N_SNP                     | Angus | Brown Swiss | Charolais | Guernsey | Hereford | Holstein | Jersey | Limousin | Norwegian Red |
| 1   | 45750               | 0.203 | 40875                  | 0.044  | 0.018 | 0.027  | 43540                     | 0.108 | 0.135       | 0.055     | 0.134    | 0.141    | 0.104    | 0.136  | 0.067    | 0.086         |
| 2   | 39429               | 0.216 | 34453                  | 0.050  | 0.019 | 0.029  | 38043                     | 0.096 | 0.123       | 0.064     | 0.119    | 0.176    | 0.113    | 0.117  | 0.081    | 0.077         |
| 3   | 35002               | 0.204 | 30599                  | 0.042  | 0.018 | 0.025  | 33583                     | 0.142 | 0.133       | 0.061     | 0.133    | 0.123    | 0.104    | 0.137  | 0.059    | 0.087         |
| 4   | 34384               | 0.206 | 30490                  | 0.042  | 0.017 | 0.024  | 32506                     | 0.129 | 0.151       | 0.058     | 0.145    | 0.129    | 0.098    | 0.119  | 0.068    | 0.116         |
| 5   | 34163               | 0.209 | 29735                  | 0.055  | 0.022 | 0.033  | 32421                     | 0.141 | 0.206       | 0.089     | 0.124    | 0.151    | 0.104    | 0.104  | 0.061    | 0.110         |
| 6   | 35015               | 0.164 | 31605                  | 0.053  | 0.025 | 0.032  | 33931                     | 0.121 | 0.242       | 0.071     | 0.140    | 0.154    | 0.106    | 0.139  | 0.069    | 0.097         |
| 7   | 32568               | 0.211 | 28996                  | 0.044  | 0.019 | 0.027  | 31726                     | 0.116 | 0.141       | 0.067     | 0.126    | 0.155    | 0.118    | 0.131  | 0.078    | 0.085         |
| 8   | 33011               | 0.259 | 29782                  | 0.049  | 0.019 | 0.028  | 29925                     | 0.105 | 0.134       | 0.072     | 0.131    | 0.095    | 0.102    | 0.106  | 0.056    | 0.085         |
| 9   | 30569               | 0.184 | 27630                  | 0.049  | 0.019 | 0.031  | 29321                     | 0.102 | 0.140       | 0.058     | 0.130    | 0.183    | 0.093    | 0.105  | 0.063    | 0.095         |
| 10  | 29956               | 0.202 | 25931                  | 0.040  | 0.019 | 0.025  | 28869                     | 0.089 | 0.117       | 0.053     | 0.137    | 0.138    | 0.112    | 0.104  | 0.067    | 0.108         |
| 11  | 31508               | 0.190 | 27488                  | 0.047  | 0.019 | 0.027  | 30904                     | 0.125 | 0.192       | 0.066     | 0.196    | 0.156    | 0.099    | 0.108  | 0.076    | 0.105         |
| 12  | 25505               | 0.207 | 21882                  | 0.043  | 0.020 | 0.026  | 24059                     | 0.114 | 0.141       | 0.065     | 0.130    | 0.122    | 0.097    | 0.104  | 0.062    | 0.086         |
| 13  | 23171               | 0.247 | 19960                  | 0.054  | 0.021 | 0.034  | 20724                     | 0.151 | 0.165       | 0.070     | 0.148    | 0.141    | 0.127    | 0.120  | 0.070    | 0.106         |
| 14  | 24358               | 0.231 | 21935                  | 0.051  | 0.020 | 0.032  | 22185                     | 0.102 | 0.140       | 0.075     | 0.113    | 0.132    | 0.107    | 0.105  | 0.082    | 0.122         |
| 15  | 24227               | 0.198 | 21560                  | 0.052  | 0.021 | 0.027  | 23626                     | 0.122 | 0.143       | 0.060     | 0.146    | 0.117    | 0.082    | 0.131  | 0.070    | 0.093         |
| 16  | 23759               | 0.195 | 21828                  | 0.054  | 0.019 | 0.033  | 23361                     | 0.111 | 0.186       | 0.060     | 0.124    | 0.115    | 0.114    | 0.102  | 0.064    | 0.074         |
| 17  | 21906               | 0.181 | 19248                  | 0.047  | 0.020 | 0.027  | 21398                     | 0.112 | 0.143       | 0.056     | 0.140    | 0.185    | 0.095    | 0.106  | 0.063    | 0.093         |
| 18  | 19001               | 0.178 | 16826                  | 0.047  | 0.019 | 0.027  | 18560                     | 0.106 | 0.169       | 0.069     | 0.132    | 0.143    | 0.086    | 0.125  | 0.061    | 0.115         |
| 19  | 18572               | 0.191 | 15918                  | 0.048  | 0.020 | 0.031  | 18393                     | 0.126 | 0.172       | 0.065     | 0.174    | 0.145    | 0.106    | 0.140  | 0.078    | 0.098         |
| 20  | 21171               | 0.182 | 18415                  | 0.050  | 0.019 | 0.029  | 20813                     | 0.100 | 0.148       | 0.057     | 0.138    | 0.123    | 0.129    | 0.142  | 0.065    | 0.080         |
| 21  | 20770               | 0.209 | 18087                  | 0.046  | 0.020 | 0.027  | 20207                     | 0.101 | 0.131       | 0.068     | 0.128    | 0.119    | 0.097    | 0.114  | 0.082    | 0.110         |
| 22  | 17747               | 0.174 | 15520                  | 0.052  | 0.021 | 0.030  | 17229                     | 0.119 | 0.167       | 0.050     | 0.159    | 0.127    | 0.109    | 0.115  | 0.069    | 0.100         |
| 23  | 14913               | 0.160 | 13482                  | 0.042  | 0.018 | 0.027  | 14594                     | 0.083 | 0.116       | 0.050     | 0.106    | 0.132    | 0.090    | 0.107  | 0.068    | 0.117         |
| 24  | 18314               | 0.213 | 16180                  | 0.039  | 0.017 | 0.023  | 17692                     | 0.108 | 0.164       | 0.057     | 0.136    | 0.170    | 0.097    | 0.120  | 0.061    | 0.092         |

|           |       |       |       |       |       |       |       |       |       |       |       |       |       |       |       |       |
|-----------|-------|-------|-------|-------|-------|-------|-------|-------|-------|-------|-------|-------|-------|-------|-------|-------|
| <b>25</b> | 12679 | 0.174 | 11098 | 0.036 | 0.019 | 0.023 | 12508 | 0.099 | 0.158 | 0.054 | 0.117 | 0.132 | 0.102 | 0.100 | 0.062 | 0.093 |
| <b>26</b> | 14959 | 0.165 | 13480 | 0.044 | 0.018 | 0.026 | 14461 | 0.108 | 0.140 | 0.053 | 0.131 | 0.130 | 0.113 | 0.125 | 0.080 | 0.101 |
| <b>27</b> | 12924 | 0.171 | 11215 | 0.041 | 0.018 | 0.026 | 12493 | 0.116 | 0.138 | 0.054 | 0.139 | 0.124 | 0.086 | 0.124 | 0.065 | 0.088 |
| <b>28</b> | 12771 | 0.170 | 11568 | 0.050 | 0.021 | 0.027 | 12630 | 0.083 | 0.128 | 0.057 | 0.128 | 0.107 | 0.089 | 0.110 | 0.073 | 0.098 |
| <b>29</b> | 14417 | 0.183 | 12716 | 0.042 | 0.017 | 0.024 | 14228 | 0.077 | 0.170 | 0.074 | 0.144 | 0.116 | 0.097 | 0.125 | 0.078 | 0.086 |
| <b>X</b>  | 38099 | 0.475 | 35950 | 0.029 | 0.021 | 0.034 | 22704 | 0.086 | 0.106 | 0.102 | 0.102 | 0.078 | 0.087 | 0.082 | 0.065 | 0.087 |
| <b>Y</b>  | 109   | 0.681 | -     | -     | -     | -     | 34    | 0.534 | 0.370 | 0.848 | 0.400 | 0.221 | 0.558 | 0.433 | 0.402 | 0.560 |
