# Supplementary material for: Genomic divergence of zebu and taurine cattle identified through high-density SNP genotyping
Source: PubMed Central journal article supplement (PMC4046821; doi:10.1186/1471-2164-14-876), 2013-12-13
Supplement: 12864_2012_5571_MOESM6_ESM.pdf [file 12864_2012_5571_MOESM6_ESM.pdf]

**Supplementary table 3. Summary of candidate regions in autosomes of positive selection detected using smoothed FST in three analyses: 1) comparing zebu-aurine animals, 2) within taurine (n = 9 breeds), and 3) within zebu (n = 3 breeds).**

The top 1% smoothed FST values for each breed in each analysis were considered peaks. For each analyses separately, if two breed specific peaks were less than 50Kb from each other they were joined into a single peak-region. In this table no attempt was made to join any breed specific peak-regions or to identify peak-regions in common (or overlaps) across breeds and across the different analyses.

| BTA | Peak_start | Peak_end | Zebu-Taurine | Within_taurine | Within_zebu |
|-----|------------|----------|--------------|----------------|-------------|
| 1   | 399506     | 399506   |              | Nor            |             |
| 1   | 571340     | 571340   |              | Her            |             |
| 1   | 1094456    | 1094456  |              | Jer            |             |
| 1   | 1666781    | 1666781  |              | Bro            |             |
| 1   | 3129850    | 3129850  |              | Her            |             |
| 1   | 3246679    | 3246679  |              | Nor            |             |
| 1   | 3807798    | 3807798  |              | Jer            |             |
| 1   | 4010489    | 4010489  |              | Gue            |             |
| 1   | 4282516    | 4282516  |              | Bro            |             |
| 1   | 7665323    | 7665323  |              | Gue            |             |
| 1   | 8111905    | 8111905  |              | Ang            |             |
| 1   | 9684361    | 9684361  |              | Jer            |             |
| 1   | 10346929   | 10346929 |              | Gue            |             |
| 1   | 11161020   | 11161020 |              | Nor            |             |
| 1   | 11482232   | 11482232 |              | Jer            |             |
| 1   | 12380238   | 12380238 |              | Gue            |             |
| 1   | 12380238   | 12380238 |              | Nor            |             |
| 1   | 12488078   | 12488078 |              | Lim            |             |
| 1   | 13697596   | 13697596 |              | Lim            |             |
| 1   | 14624014   | 14624014 |              | Ang            |             |
| 1   | 15554023   | 15554023 |              | Ang            |             |
| 1   | 15554023   | 15554023 |              | Hol            |             |
| 1   | 15976386   | 15976386 |              | Jer            |             |
| 1   | 16627180   | 16627180 |              | Her            |             |
| 1   | 19152223   | 19152223 |              | Jer            |             |
| 1   | 19799108   | 19799108 |              | Ang            |             |
| 1   | 20071616   | 20071616 |              | Nor            |             |
| 1   | 20402008   | 20402008 |              | Lim            |             |
| 1   | 20786987   | 20786987 |              | Jer            |             |
| 1   | 21278811   | 21278811 |              | Bro            |             |
| 1   | 22510052   | 22510052 |              | Ang            |             |
| 1   | 23196692   | 23196692 |              | Ang            |             |
| 1   | 24059226   | 24059226 |              | Ang            |             |
| 1   | 24164664   | 24164664 |              | Nor            |             |
| 1   | 25999738   | 25999738 |              | Nor            |             |
| 1   | 27913863   | 27913863 |              | Her            |             |
| 1   | 28820688   | 28820688 |              | Hol            |             |
| 1   | 33631349   | 33631349 |              | Hol            |             |

|   |          |          |     |     |
|---|----------|----------|-----|-----|
| 1 | 33663674 | 33663674 | Gue |     |
| 1 | 34331115 | 34331115 | Gue |     |
| 1 | 35056086 | 35056086 | Lim |     |
| 1 | 36323950 | 36323950 | Jer |     |
| 1 | 37100951 | 37100951 | Lim |     |
| 1 | 37603937 | 37603937 | Ang |     |
| 1 | 38307976 | 38307976 |     | Nel |
| 1 | 38875334 | 38875334 | Her |     |
| 1 | 38908284 | 38908284 | Ang |     |
| 1 | 39045328 | 39045328 | Lim |     |
| 1 | 39606695 | 39606695 | Bro |     |
| 1 | 39844099 | 39844099 | Nor |     |
| 1 | 41814694 | 41814694 | Jer |     |
| 1 | 47743810 | 47743810 | Bro |     |
| 1 | 48338528 | 48338528 | Bro |     |
| 1 | 48772543 | 48772543 | Jer |     |
| 1 | 48833934 | 48833934 | Gue |     |
| 1 | 49861333 | 49861333 | Her |     |
| 1 | 50067523 | 50097027 | Nor |     |
| 1 | 50337394 | 50337394 | Nor |     |
| 1 | 54625163 | 54625163 | Bro |     |
| 1 | 55370763 | 55370763 | Bro |     |
| 1 | 55499124 | 55499124 | Nor |     |
| 1 | 55735039 | 55735039 | Bro |     |
| 1 | 55881470 | 55881470 | Hol |     |
| 1 | 55998138 | 55998138 | Her |     |
| 1 | 56027212 | 56027212 | Gue |     |
| 1 | 56143825 | 56143825 | Ang |     |
| 1 | 56598694 | 56598694 | Gue |     |
| 1 | 56620756 | 56620756 | Lim |     |
| 1 | 56874618 | 56874618 | Gue |     |
| 1 | 56949298 | 56949298 | Nor |     |
| 1 | 59300477 | 59300477 | Lim |     |
| 1 | 61365597 | 61365597 | Hol |     |
| 1 | 61931836 | 61931836 | Gue |     |
| 1 | 63366408 | 63366408 | Ang |     |
| 1 | 63644513 | 63644513 | Bro |     |
| 1 | 63674787 | 63983394 |     | Nel |
| 1 | 66877916 | 66877916 | Bro |     |
| 1 | 67291110 | 67291110 | Ang |     |
| 1 | 67291110 | 67291110 | Jer |     |
| 1 | 68098581 | 68098581 | Lim |     |
| 1 | 69295961 | 69295961 | Gue |     |
| 1 | 70759781 | 70759781 | Hol |     |
| 1 | 72286379 | 72286379 | Bro |     |
| 1 | 72649349 | 72649349 | Gue |     |
| 1 | 72724406 | 72724406 | Bro |     |
| 1 | 74302401 | 74302401 | Bro |     |

|   |          |          |     |
|---|----------|----------|-----|
| 1 | 74585891 | 74585891 | Gue |
| 1 | 74679286 | 74718807 | Bro |
| 1 | 74679286 | 74718807 | Cha |
| 1 | 74822552 | 74822552 | Bro |
| 1 | 74822552 | 74822552 | Cha |
| 1 | 75028047 | 75028047 | Cha |
| 1 | 75135995 | 75309533 | Cha |
| 1 | 75206924 | 75206924 | Jer |
| 1 | 75367346 | 75367346 | Hol |
| 1 | 75553499 | 75553499 | Lim |
| 1 | 75574770 | 75574770 | Ang |
| 1 | 75736512 | 75736512 | Jer |
| 1 | 75811289 | 75811289 | Nor |
| 1 | 75993310 | 75993310 | Lim |
| 1 | 76110765 | 76110765 | Lim |
| 1 | 76285407 | 76527417 | Cha |
| 1 | 79155749 | 79155749 | Hol |
| 1 | 79810878 | 79810878 | Bro |
| 1 | 79976244 | 79976244 | Lim |
| 1 | 80441713 | 80441713 | Hol |
| 1 | 81289271 | 81289271 | Ang |
| 1 | 83309970 | 83309970 | Lim |
| 1 | 83903856 | 83903856 | Bro |
| 1 | 85888115 | 85888115 | Her |
| 1 | 87258985 | 87258985 | Hol |
| 1 | 87381119 | 87381119 | Jer |
| 1 | 88462591 | 88462591 | Jer |
| 1 | 88801264 | 88801264 | Gue |
| 1 | 89245146 | 89245146 | Nor |
| 1 | 89600494 | 89600494 | Gue |
| 1 | 89697566 | 89697566 | Bro |
| 1 | 89828304 | 89828304 | Bro |
| 1 | 90704654 | 90704654 | Jer |
| 1 | 90919291 | 90919291 | Ang |
| 1 | 91066621 | 91066621 | Lim |
| 1 | 91823434 | 91823434 | Nor |
| 1 | 91890443 | 91890443 | Ang |
| 1 | 92014411 | 92014411 | Lim |
| 1 | 92186479 | 92186479 | Lim |
| 1 | 92417044 | 92417044 | Hol |
| 1 | 93027728 | 93027728 | Her |
| 1 | 93608310 | 93672088 | Cha |
| 1 | 93608310 | 93608310 | Hol |
| 1 | 93841104 | 94409201 | Cha |
| 1 | 93841104 | 93841104 | Hol |
| 1 | 94199961 | 94199961 | Lim |
| 1 | 94361121 | 94361121 | Jer |
| 1 | 94511587 | 94511587 | Hol |

|   |           |           |     |     |
|---|-----------|-----------|-----|-----|
| 1 | 96477076  | 96477076  | Jer |     |
| 1 | 96923981  | 96923981  | Her |     |
| 1 | 97254722  | 97254722  | Jer |     |
| 1 | 99261398  | 99261398  | Bro |     |
| 1 | 100108192 | 100108192 | Lim |     |
| 1 | 102140097 | 102140097 | Nor |     |
| 1 | 102349222 | 102349222 | Nor |     |
| 1 | 102403092 | 102403092 | Bro |     |
| 1 | 102628793 | 102628793 | Gue |     |
| 1 | 102888992 | 102888992 | Nor |     |
| 1 | 103117773 | 103117773 | Ang |     |
| 1 | 103370251 | 103370251 | Bro |     |
| 1 | 105018867 | 105018867 | Gue |     |
| 1 | 106400046 | 106400046 | Gue |     |
| 1 | 106665821 | 106665821 | Nor |     |
| 1 | 106833049 | 106833049 | Jer |     |
| 1 | 106881204 | 106881204 | Nor |     |
| 1 | 107241380 | 107241380 | Gue |     |
| 1 | 107410516 | 107410516 | Bro |     |
| 1 | 107410516 | 107410516 | Her |     |
| 1 | 108099284 | 108099284 | Nor |     |
| 1 | 108708542 | 108708542 | Her |     |
| 1 | 111674525 | 111674525 | Nor |     |
| 1 | 112734752 | 112734752 | Gue |     |
| 1 | 113499809 | 113499809 | Jer |     |
| 1 | 115074035 | 115074035 | Nor |     |
| 1 | 115385404 | 115385404 | Nor |     |
| 1 | 115752909 | 115752909 | Her |     |
| 1 | 115752909 | 115752909 | Hol |     |
| 1 | 115954859 | 115954859 | Bro |     |
| 1 | 117567419 | 117567419 | Ang |     |
| 1 | 117588730 | 117829536 |     | Guz |
| 1 | 117699067 | 117699067 | Bro |     |
| 1 | 117926170 | 117926170 | Lim |     |
| 1 | 121191922 | 121191922 | Lim |     |
| 1 | 121945003 | 121945003 | Hol |     |
| 1 | 122427093 | 122427093 | Her |     |
| 1 | 122787987 | 122787987 | Bro |     |
| 1 | 122787987 | 122787987 | Hol |     |
| 1 | 124396724 | 124396724 | Nor |     |
| 1 | 124596574 | 124596574 | Hol |     |
| 1 | 125064596 | 125064596 | Nor |     |
| 1 | 126538395 | 126538395 | Ang |     |
| 1 | 126994435 | 126994435 | Gue |     |
| 1 | 128255883 | 128255883 | Her |     |
| 1 | 129741579 | 129741579 | Lim |     |
| 1 | 130552004 | 130552004 | Ang |     |
| 1 | 130552004 | 130552004 | Gue |     |

|   |           |           |     |     |
|---|-----------|-----------|-----|-----|
| 1 | 130820087 | 130820087 | Jer |     |
| 1 | 131011331 | 131011331 | Gue |     |
| 1 | 134798943 | 134798943 | Jer |     |
| 1 | 135031329 | 135031329 | Jer |     |
| 1 | 135594701 | 135594701 | Hol |     |
| 1 | 136137365 | 136137365 | Bro |     |
| 1 | 136567014 | 136567014 | Ang |     |
| 1 | 139159980 | 139251277 |     | Gir |
| 1 | 139560861 | 139560861 | Lim |     |
| 1 | 139847652 | 139847652 | Gue |     |
| 1 | 140273555 | 140273555 | Her |     |
| 1 | 140709356 | 140709356 | Lim |     |
| 1 | 141685250 | 141728055 | Her |     |
| 1 | 142199519 | 142199519 | Hol |     |
| 1 | 142425137 | 142425137 | Her |     |
| 1 | 142551927 | 142551927 | Jer |     |
| 1 | 142766186 | 142766186 | Jer |     |
| 1 | 142856767 | 142887803 | Ang |     |
| 1 | 142856767 | 142856767 | Nor |     |
| 1 | 143016693 | 143164410 |     | Guz |
| 1 | 143016693 | 143141556 |     | Nel |
| 1 | 143145310 | 143145310 | Her |     |
| 1 | 144192798 | 144192798 | Bro |     |
| 1 | 144204684 | 144414936 |     | Guz |
| 1 | 144429157 | 144429157 | Nor |     |
| 1 | 144524860 | 144524860 | Lim |     |
| 1 | 145547429 | 145547429 | Ang |     |
| 1 | 145842336 | 145842336 | Nor |     |
| 1 | 147812230 | 147920597 |     | Nel |
| 1 | 148203263 | 148277313 |     | Gir |
| 1 | 148284136 | 148284136 | Her |     |
| 1 | 148405539 | 148405539 | Ang |     |
| 1 | 148514653 | 148514653 | Hol |     |
| 1 | 150055733 | 150055733 | Jer |     |
| 1 | 150367867 | 150367867 | Jer |     |
| 1 | 151315136 | 151315136 | Her |     |
| 1 | 151355656 | 151355656 | Hol |     |
| 1 | 151508673 | 151508673 | Lim |     |
| 1 | 151687326 | 151687326 | Bro |     |
| 1 | 152630666 | 152630666 | Ang |     |
| 1 | 153076432 | 153076432 | Nor |     |
| 1 | 153528274 | 153528274 | Bro |     |
| 1 | 153806681 | 153806681 | Ang |     |
| 1 | 154016701 | 154016701 | Bro |     |
| 1 | 155167189 | 155167189 | Her |     |
| 1 | 155674973 | 155674973 | Gue |     |
| 1 | 156700396 | 156700396 | Jer |     |
| 1 | 157849523 | 157849523 | Nor |     |

|   |           |           |     |
|---|-----------|-----------|-----|
| 1 | 157883533 | 157883533 | Hol |
| 1 | 158282513 | 158282513 | Hol |
| 2 | 646808    | 646808    | Ang |
| 2 | 1596441   | 1596441   | Gue |
| 2 | 2280719   | 2280719   | Bro |
| 2 | 4136804   | 4136804   | Nor |
| 2 | 4157616   | 4157616   | Hol |
| 2 | 4389239   | 4389239   | Lim |
| 2 | 4568324   | 4568324   | Lim |
| 2 | 5041395   | 5041395   | Bro |
| 2 | 5870153   | 5870153   | Bro |
| 2 | 5977564   | 5977564   | Jer |
| 2 | 6022748   | 6022748   | Bro |
| 2 | 9102872   | 9102872   | Hol |
| 2 | 9418115   | 9418115   | Jer |
| 2 | 10174040  | 10174040  | Ang |
| 2 | 10348519  | 10348519  | Lim |
| 2 | 11640024  | 11640024  | Her |
| 2 | 11884273  | 11884273  | Jer |
| 2 | 12436034  | 12436034  | Bro |
| 2 | 12480914  | 12480914  | Ang |
| 2 | 12533969  | 12533969  | Lim |
| 2 | 13301199  | 13301199  | Lim |
| 2 | 13396487  | 13396487  | Her |
| 2 | 13682527  | 13682527  | Lim |
| 2 | 13723329  | 13723329  | Bro |
| 2 | 14211270  | 14211270  | Nor |
| 2 | 16429115  | 16429115  | Gue |
| 2 | 17111598  | 17111598  | Lim |
| 2 | 17921005  | 17921005  | Ang |
| 2 | 18102582  | 18102582  | Gue |
| 2 | 18180730  | 18180730  | Jer |
| 2 | 18357045  | 18357045  | Bro |
| 2 | 18685033  | 18685033  | Lim |
| 2 | 19280130  | 19280130  | Gue |
| 2 | 23693202  | 23693202  | Ang |
| 2 | 24382976  | 24382976  | Nor |
| 2 | 24423751  | 24423751  | Jer |
| 2 | 24737161  | 24737161  | Nor |
| 2 | 26011778  | 26011778  | Bro |
| 2 | 27066560  | 27066560  | Hol |
| 2 | 27136048  | 27136048  | Nor |
| 2 | 27859036  | 27859036  | Hol |
| 2 | 27859036  | 27859036  | Nor |
| 2 | 28391327  | 28391327  | Ang |
| 2 | 28672357  | 28672357  | Bro |
| 2 | 28672357  | 28672357  | Gue |
| 2 | 28870029  | 28870029  | Jer |

|   |          |          |    |     |
|---|----------|----------|----|-----|
| 2 | 30323278 | 30323278 |    | Nor |
| 2 | 31966138 | 31966138 |    | Her |
| 2 | 32329120 | 32329120 |    | Jer |
| 2 | 32439651 | 32439651 |    | Ang |
| 2 | 33636445 | 33636445 |    | Jer |
| 2 | 34919470 | 34919470 |    | Lim |
| 2 | 35402595 | 35402595 |    | Bro |
| 2 | 36270652 | 36270652 |    | Nor |
| 2 | 36763328 | 36763328 |    | Her |
| 2 | 37304367 | 37304367 |    | Lim |
| 2 | 37526672 | 37526672 |    | Jer |
| 2 | 37702062 | 37702062 |    | Lim |
| 2 | 39089169 | 39089169 |    | Bro |
| 2 | 39089169 | 39089169 |    | Hol |
| 2 | 40094725 | 40094725 |    | Ang |
| 2 | 40094725 | 40094725 |    | Hol |
| 2 | 40850499 | 40850499 |    | Gue |
| 2 | 41908338 | 41908338 |    | Her |
| 2 | 44204687 | 44204687 |    | Jer |
| 2 | 46655612 | 46655612 |    | Lim |
| 2 | 47857335 | 48065161 | ZT |     |
| 2 | 48516124 | 48516124 |    | Nor |
| 2 | 52168719 | 52168719 |    | Nor |
| 2 | 52946980 | 52946980 |    | Hol |
| 2 | 53180385 | 53180385 |    | Jer |
| 2 | 53552010 | 53552010 |    | Bro |
| 2 | 53775362 | 53775362 |    | Her |
| 2 | 53995940 | 53995940 |    | Jer |
| 2 | 55414166 | 55414166 |    | Bro |
| 2 | 56693788 | 56693788 |    | Ang |
| 2 | 57800824 | 57800824 |    | Gue |
| 2 | 58824184 | 58824184 |    | Lim |
| 2 | 59591867 | 59591867 |    | Ang |
| 2 | 59875940 | 59875940 |    | Her |
| 2 | 60063026 | 60063026 |    | Ang |
| 2 | 60115259 | 60115259 |    | Lim |
| 2 | 60566784 | 60566784 |    | Nor |
| 2 | 61244832 | 61244832 |    | Ang |
| 2 | 61244832 | 61244832 |    | Gue |
| 2 | 61244832 | 61244832 |    | Hol |
| 2 | 61506516 | 61506516 |    | Gue |
| 2 | 61569580 | 61569580 |    | Hol |
| 2 | 61613191 | 62280025 |    | Cha |
| 2 | 61766123 | 61766123 |    | Gue |
| 2 | 62380547 | 62380547 |    | Bro |
| 2 | 62380547 | 62440950 |    | Cha |
| 2 | 62946327 | 62946327 |    | Lim |
| 2 | 62979265 | 62979265 |    | Gue |

|   |          |          |    |     |     |
|---|----------|----------|----|-----|-----|
| 2 | 62979265 | 62979265 |    | Her |     |
| 2 | 63966741 | 63966741 |    | Jer |     |
| 2 | 64385878 | 64385878 |    | Bro |     |
| 2 | 65695312 | 65695312 |    | Hol |     |
| 2 | 65804538 | 65804538 |    | Her |     |
| 2 | 66233586 | 66649528 |    |     | Guz |
| 2 | 66391542 | 66558980 |    |     | Nel |
| 2 | 67515924 | 67515924 |    | Hol |     |
| 2 | 69251179 | 69251179 |    | Hol |     |
| 2 | 69527656 | 69527656 |    | Her |     |
| 2 | 70717882 | 70717882 |    | Lim |     |
| 2 | 71565086 | 72228200 | ZT |     |     |
| 2 | 71893504 | 71893504 |    | Hol |     |
| 2 | 72329320 | 72885823 | ZT |     |     |
| 2 | 73274348 | 73274348 |    | Gue |     |
| 2 | 74090172 | 74173898 |    | Cha |     |
| 2 | 74202772 | 74202772 |    | Lim |     |
| 2 | 74642174 | 74642174 |    | Hol |     |
| 2 | 74642174 | 74642174 |    | Jer |     |
| 2 | 75210246 | 75210246 |    | Nor |     |
| 2 | 75885171 | 76083544 |    | Cha |     |
| 2 | 76766037 | 76766037 |    | Gue |     |
| 2 | 78609064 | 78609064 |    | Bro |     |
| 2 | 78893301 | 78893301 |    | Jer |     |
| 2 | 79153842 | 79153842 |    | Bro |     |
| 2 | 79259841 | 79525424 |    |     | Guz |
| 2 | 79490369 | 79525424 |    |     | Nel |
| 2 | 79642876 | 80179443 |    |     | Guz |
| 2 | 79642876 | 80066104 |    |     | Nel |
| 2 | 80521364 | 80521364 |    | Lim |     |
| 2 | 81527119 | 81527119 |    | Ang |     |
| 2 | 82245159 | 82245159 |    | Bro |     |
| 2 | 82448538 | 82448538 |    | Bro |     |
| 2 | 82763789 | 82763789 |    | Jer |     |
| 2 | 83349093 | 83349093 |    | Jer |     |
| 2 | 83500338 | 83500338 |    | Ang |     |
| 2 | 84064764 | 84064764 |    | Hol |     |
| 2 | 84348194 | 84348194 |    | Lim |     |
| 2 | 84954520 | 84954520 |    | Gue |     |
| 2 | 87553236 | 87553236 |    | Lim |     |
| 2 | 88047008 | 88047008 |    | Hol |     |
| 2 | 89756351 | 89756351 |    | Her |     |
| 2 | 90734138 | 90734138 |    | Her |     |
| 2 | 91614274 | 91614274 |    | Bro |     |
| 2 | 92080445 | 92080445 |    | Jer |     |
| 2 | 92396877 | 92396877 |    | Lim |     |
| 2 | 93325192 | 93325192 |    | Ang |     |
| 2 | 93408277 | 93408277 |    | Lim |     |



|   |           |           |     |     |
|---|-----------|-----------|-----|-----|
| 2 | 93495708  | 93495708  | Her |     |
| 2 | 93549360  | 93549360  | Lim |     |
| 2 | 93951461  | 93951461  | Lim |     |
| 2 | 94072308  | 94072308  | Bro |     |
| 2 | 94072308  | 94072308  | Hol |     |
| 2 | 94260936  | 94260936  | Nor |     |
| 2 | 95199905  | 95199905  | Ang |     |
| 2 | 96082524  | 96082524  | Hol |     |
| 2 | 96961746  | 96961746  | Nor |     |
| 2 | 97080357  | 97080357  | Jer |     |
| 2 | 101875760 | 101875760 | Her |     |
| 2 | 102538954 | 103096368 |     | Gir |
| 2 | 103663439 | 103663439 | Bro |     |
| 2 | 103707675 | 103707675 | Jer |     |
| 2 | 103848414 | 103848414 | Jer |     |
| 2 | 104540939 | 104540939 | Lim |     |
| 2 | 104958840 | 105258724 |     | Nel |
| 2 | 105040403 | 105040403 | Her |     |
| 2 | 105042095 | 105178397 |     | Guz |
| 2 | 105158290 | 105158290 | Jer |     |
| 2 | 105666691 | 105666691 | Gue |     |
| 2 | 105748575 | 105748575 | Nor |     |
| 2 | 106925004 | 106925004 | Hol |     |
| 2 | 107472555 | 107472555 | Her |     |
| 2 | 107524304 | 107524304 | Ang |     |
| 2 | 108181274 | 108181274 | Hol |     |
| 2 | 108362982 | 108362982 | Hol |     |
| 2 | 108495497 | 108495497 | Her |     |
| 2 | 108913997 | 108913997 | Ang |     |
| 2 | 110703049 | 110703049 | Gue |     |
| 2 | 112110103 | 112110103 | Ang |     |
| 2 | 112227843 | 112227843 | Jer |     |
| 2 | 114067552 | 114067552 | Jer |     |
| 2 | 116128218 | 116128218 | Jer |     |
| 2 | 117210902 | 117210902 | Ang |     |
| 2 | 117305584 | 117305584 | Gue |     |
| 2 | 117451325 | 117502424 | Cha |     |
| 2 | 117531904 | 117531904 | Lim |     |
| 2 | 117686433 | 117686433 | Bro |     |
| 2 | 117686433 | 117686433 | Hol |     |
| 2 | 118500317 | 118500317 | Ang |     |
| 2 | 118591144 | 118591144 | Lim |     |
| 2 | 118947575 | 118947575 | Ang |     |
| 2 | 118994262 | 118994262 | Bro |     |
| 2 | 119122938 | 119122938 | Ang |     |
| 2 | 119293733 | 120037582 | Cha |     |
| 2 | 119350819 | 119350819 | Bro |     |
| 2 | 119350819 | 119350819 | Gue |     |

|   |           |           |     |     |
|---|-----------|-----------|-----|-----|
| 2 | 119452002 | 119546677 | Lim |     |
| 2 | 119668056 | 119965520 |     | Nel |
| 2 | 119708912 | 119946550 |     | Guz |
| 2 | 119870309 | 119870309 | Lim |     |
| 2 | 120751088 | 120751088 | Gue |     |
| 2 | 120784862 | 120784862 | Bro |     |
| 2 | 120993778 | 120993778 | Lim |     |
| 2 | 121707643 | 121733389 | Lim |     |
| 2 | 121757818 | 121757818 | Ang |     |
| 2 | 121757818 | 121895125 | Cha |     |
| 2 | 121757818 | 121757818 | Hol |     |
| 2 | 121757818 | 121757818 | Jer |     |
| 2 | 121954509 | 121954509 | Lim |     |
| 2 | 123217794 | 123217794 | Bro |     |
| 2 | 126050590 | 126050590 | Hol |     |
| 2 | 127206815 | 127206815 | Bro |     |
| 2 | 127206815 | 127263801 | Hol |     |
| 2 | 127680352 | 127680352 | Lim |     |
| 2 | 128021742 | 128021742 | Her |     |
| 2 | 128451474 | 128451474 | Lim |     |
| 2 | 128606233 | 128826190 |     | Nel |
| 2 | 128915082 | 128915082 | Hol |     |
| 2 | 130843893 | 130843893 | Hol |     |
| 2 | 131320980 | 131320980 | Hol |     |
| 2 | 131817068 | 131817068 | Nor |     |
| 2 | 132582699 | 132582699 | Hol |     |
| 2 | 133482329 | 133482329 | Jer |     |
| 2 | 133523656 | 133523656 | Hol |     |
| 2 | 134481652 | 134481652 | Ang |     |
| 2 | 135241531 | 135241531 | Her |     |
| 2 | 135864028 | 135864028 | Her |     |
| 3 | 452620    | 452620    | Bro |     |
| 3 | 565368    | 565368    | Jer |     |
| 3 | 939853    | 939853    | Jer |     |
| 3 | 1200810   | 1200810   | Gue |     |
| 3 | 3071606   | 3071606   | Gue |     |
| 3 | 4099239   | 4099239   | Bro |     |
| 3 | 4099239   | 4099239   | Jer |     |
| 3 | 4099239   | 4099239   | Lim |     |
| 3 | 4278285   | 4278285   | Nor |     |
| 3 | 4487413   | 4487413   | Bro |     |
| 3 | 4867336   | 4867336   | Ang |     |
| 3 | 5577229   | 5577229   | Her |     |
| 3 | 6845205   | 6845205   | Nor |     |
| 3 | 7749394   | 7749394   | Ang |     |
| 3 | 7874948   | 7874948   | Bro |     |
| 3 | 9631023   | 9631023   | Jer |     |
| 3 | 9997905   | 9997905   | Bro |     |

|   |          |          |    |     |
|---|----------|----------|----|-----|
| 3 | 10240563 | 10240563 |    | Bro |
| 3 | 10737892 | 10737892 |    | Her |
| 3 | 11037495 | 11037495 |    | Her |
| 3 | 11107155 | 11107155 |    | Gue |
| 3 | 11142773 | 11142773 |    | Her |
| 3 | 11594566 | 11594566 |    | Hol |
| 3 | 15883697 | 15883697 |    | Gue |
| 3 | 16390961 | 16390961 |    | Nor |
| 3 | 19689648 | 20166059 | ZT |     |
| 3 | 20065439 | 20065439 |    | Hol |
| 3 | 20065439 | 20065439 |    | Nor |
| 3 | 20207243 | 20207243 |    | Bro |
| 3 | 21925914 | 21925914 |    | Her |
| 3 | 21925914 | 21925914 |    | Jer |
| 3 | 22362469 | 22362469 |    | Lim |
| 3 | 22509000 | 22509000 |    | Hol |
| 3 | 23791827 | 23791827 |    | Lim |
| 3 | 24350459 | 24350459 |    | Lim |
| 3 | 24487867 | 24597335 |    | Cha |
| 3 | 25074163 | 25074163 |    | Lim |
| 3 | 27594669 | 27594669 |    | Hol |
| 3 | 28054460 | 28054460 |    | Her |
| 3 | 28116948 | 28116948 |    | Bro |
| 3 | 29329346 | 29329346 |    | Bro |
| 3 | 30331825 | 30331825 |    | Ang |
| 3 | 31641866 | 31641866 |    | Lim |
| 3 | 32076326 | 32076326 |    | Hol |
| 3 | 32342257 | 32342257 |    | Lim |
| 3 | 32416106 | 32416106 |    | Bro |
| 3 | 32416106 | 32416106 |    | Cha |
| 3 | 32537088 | 32620178 |    | Cha |
| 3 | 32731219 | 32731219 |    | Cha |
| 3 | 32986013 | 32986013 |    | Her |
| 3 | 34208191 | 34208191 |    | Nor |
| 3 | 34424540 | 34424540 |    | Gue |
| 3 | 34576718 | 34576718 |    | Bro |
| 3 | 35785053 | 35785053 |    | Hol |
| 3 | 36469616 | 36469616 |    | Her |
| 3 | 36469616 | 36469616 |    | Hol |
| 3 | 37996416 | 37996416 |    | Gue |
| 3 | 38048428 | 38048428 |    | Hol |
| 3 | 38241587 | 38241587 |    | Her |
| 3 | 39547004 | 39547004 |    | Jer |
| 3 | 40130621 | 40130621 |    | Jer |
| 3 | 40535360 | 40535360 |    | Ang |
| 3 | 40950927 | 40950927 |    | Hol |
| 3 | 43009131 | 43009131 |    | Jer |
| 3 | 43749668 | 43749668 |    | Lim |

|   |          |          |     |     |
|---|----------|----------|-----|-----|
| 3 | 43831677 | 43831677 | Nor |     |
| 3 | 43980009 | 43980009 | Lim |     |
| 3 | 45518641 | 45518641 | Jer |     |
| 3 | 46721234 | 46721234 | Gue |     |
| 3 | 47279869 | 47279869 | Lim |     |
| 3 | 47471386 | 47471386 | Bro |     |
| 3 | 48631933 | 48631933 | Gue |     |
| 3 | 49592722 | 49592722 | Jer |     |
| 3 | 49665930 | 49665930 | Lim |     |
| 3 | 53997758 | 53997758 | Jer |     |
| 3 | 54731814 | 54731814 | Jer |     |
| 3 | 55627105 | 55700001 |     | Nel |
| 3 | 55629068 | 55629068 | Gue |     |
| 3 | 55832709 | 55832709 |     | Nel |
| 3 | 56084554 | 56084554 | Nor |     |
| 3 | 56787867 | 56787867 | Bro |     |
| 3 | 57159614 | 57159614 | Her |     |
| 3 | 57809978 | 57809978 | Hol |     |
| 3 | 58231701 | 58231701 | Lim |     |
| 3 | 58953004 | 58953004 | Bro |     |
| 3 | 59423265 | 59423265 | Bro |     |
| 3 | 60680636 | 60680636 | Hol |     |
| 3 | 63049356 | 63049356 | Ang |     |
| 3 | 63398273 | 63398273 | Jer |     |
| 3 | 63724726 | 63724726 | Jer |     |
| 3 | 64607605 | 64607605 | Her |     |
| 3 | 64772318 | 64772318 | Ang |     |
| 3 | 65422854 | 65422854 | Her |     |
| 3 | 67942605 | 67942605 | Her |     |
| 3 | 70955109 | 70955109 | Gue |     |
| 3 | 71095209 | 71095209 | Lim |     |
| 3 | 73081911 | 73081911 | Ang |     |
| 3 | 73455740 | 73455740 | Gue |     |
| 3 | 73739712 | 73739712 | Lim |     |
| 3 | 74075284 | 74075284 | Nor |     |
| 3 | 74471839 | 74471839 | Her |     |
| 3 | 75082992 | 75082992 | Her |     |
| 3 | 75450949 | 75450949 | Bro |     |
| 3 | 75688684 | 75688684 | Jer |     |
| 3 | 77727223 | 77727223 | Her |     |
| 3 | 78788446 | 78788446 | Hol |     |
| 3 | 78832116 | 78832116 | Lim |     |
| 3 | 80028642 | 80028642 | Lim |     |
| 3 | 81172014 | 81172014 | Lim |     |
| 3 | 81597965 | 81597965 | Hol |     |
| 3 | 81634346 | 81634346 | Her |     |
| 3 | 81777433 | 81777433 | Her |     |
| 3 | 83413464 | 83413464 | Her |     |

|   |           |           |    |     |
|---|-----------|-----------|----|-----|
| 3 | 84920929  | 84920929  |    | Hol |
| 3 | 87595926  | 87595926  |    | Bro |
| 3 | 87808481  | 87808481  |    | Ang |
| 3 | 88899431  | 88899431  |    | Nor |
| 3 | 90386098  | 90386098  |    | Bro |
| 3 | 91328969  | 91328969  |    | Ang |
| 3 | 91328969  | 91328969  |    | Hol |
| 3 | 92050686  | 92050686  |    | Lim |
| 3 | 93666280  | 93666280  |    | Gue |
| 3 | 93985538  | 93985538  |    | Jer |
| 3 | 94063731  | 94063731  |    | Bro |
| 3 | 94742479  | 95401345  | ZT |     |
| 3 | 96021243  | 96021243  |    | Ang |
| 3 | 97099662  | 97099662  |    | Nor |
| 3 | 97244701  | 97244701  |    | Ang |
| 3 | 97863924  | 97863924  |    | Ang |
| 3 | 97981877  | 97981877  |    | Hol |
| 3 | 98095410  | 98095410  |    | Her |
| 3 | 98222548  | 98222548  |    | Nor |
| 3 | 98904556  | 98904556  |    | Hol |
| 3 | 99312179  | 99312179  |    | Her |
| 3 | 102282008 | 102282008 |    | Bro |
| 3 | 103376036 | 103376036 |    | Jer |
| 3 | 103480386 | 103480386 |    | Ang |
| 3 | 103637948 | 103637948 |    | Her |
| 3 | 104385665 | 104385665 |    | Hol |
| 3 | 104566106 | 104566106 |    | Jer |
| 3 | 105017393 | 105017393 |    | Jer |
| 3 | 105942016 | 105942016 |    | Lim |
| 3 | 105989537 | 105989537 |    | Bro |
| 3 | 106490874 | 106490874 |    | Hol |
| 3 | 106845577 | 106845577 |    | Hol |
| 3 | 106948502 | 106948502 |    | Gue |
| 3 | 108243606 | 108243606 |    | Gue |
| 3 | 109566974 | 109566974 |    | Lim |
| 3 | 110374505 | 110374505 |    | Her |
| 3 | 110689018 | 110689018 |    | Hol |
| 3 | 111197176 | 111197176 |    | Jer |
| 3 | 111492824 | 111492824 |    | Lim |
| 3 | 111557162 | 111557162 |    | Nor |
| 3 | 112528099 | 112528099 |    | Her |
| 3 | 112853018 | 112853018 |    | Ang |
| 3 | 113625978 | 113625978 |    | Nor |
| 3 | 114578646 | 114578646 |    | Her |
| 3 | 115195756 | 115195756 |    | Lim |
| 3 | 115727220 | 115727220 |    | Jer |
| 3 | 115917466 | 115917466 |    | Nor |
| 3 | 116551733 | 116551733 |    | Ang |

|   |           |           |    |     |
|---|-----------|-----------|----|-----|
| 3 | 117104133 | 117104133 |    | Ang |
| 3 | 117434023 | 117526423 |    | Nor |
| 3 | 117477829 | 117477829 |    | Lim |
| 3 | 117602026 | 117602026 |    | Bro |
| 3 | 119177155 | 119177155 |    | Jer |
| 3 | 120250131 | 120250131 |    | Ang |
| 3 | 124586031 | 124586031 |    | Jer |
| 4 | 2729422   | 2729422   |    | Jer |
| 4 | 3196019   | 3196019   |    | Nor |
| 4 | 3700272   | 3700272   |    | Bro |
| 4 | 3930202   | 3930202   |    | Bro |
| 4 | 5061724   | 5061724   |    | Hol |
| 4 | 6298054   | 6298054   |    | Hol |
| 4 | 7708368   | 7708368   |    | Jer |
| 4 | 8338571   | 8408268   |    | Gue |
| 4 | 9105532   | 9105532   |    | Gue |
| 4 | 10720132  | 10720132  |    | Jer |
| 4 | 11477947  | 11477947  |    | Nor |
| 4 | 12106878  | 12361811  | ZT |     |
| 4 | 12657845  | 12657845  |    | Ang |
| 4 | 12657845  | 12657845  |    | Hol |
| 4 | 12657845  | 12657845  |    | Jer |
| 4 | 13098702  | 13098702  |    | Hol |
| 4 | 14831474  | 14831474  |    | Nor |
| 4 | 15186402  | 15186402  |    | Nor |
| 4 | 15329081  | 15329081  |    | Nor |
| 4 | 15423695  | 15423695  |    | Lim |
| 4 | 15575489  | 15575489  |    | Her |
| 4 | 15689489  | 15689489  |    | Hol |
| 4 | 15909646  | 15909646  |    | Her |
| 4 | 17487722  | 17487722  |    | Lim |
| 4 | 17568532  | 17568532  |    | Jer |
| 4 | 18514743  | 18514743  |    | Nor |
| 4 | 18977629  | 18977629  |    | Gue |
| 4 | 20786756  | 20786756  |    | Bro |
| 4 | 21024200  | 21024200  |    | Her |
| 4 | 21182534  | 21182534  |    | Lim |
| 4 | 21924904  | 21924904  |    | Nor |
| 4 | 22856027  | 22856027  |    | Gue |
| 4 | 23054302  | 23054302  |    | Lim |
| 4 | 23406784  | 23406784  |    | Nor |
| 4 | 23747430  | 23747430  |    | Gue |
| 4 | 24001957  | 24001957  |    | Ang |
| 4 | 26676918  | 26676918  |    | Nor |
| 4 | 27413627  | 27413627  |    | Gue |
| 4 | 28512491  | 28512491  |    | Jer |
| 4 | 29613879  | 29613879  |    | Nor |
| 4 | 30372172  | 30372172  |    | Hol |

|   |          |          |    |     |     |
|---|----------|----------|----|-----|-----|
| 4 | 30760882 | 30760882 |    | Gue |     |
| 4 | 32802556 | 32802556 |    | Bro |     |
| 4 | 32968840 | 32968840 |    | Nor |     |
| 4 | 35964068 | 36058064 |    |     | Nel |
| 4 | 36012109 | 36012109 |    | Hol |     |
| 4 | 36134798 | 36134798 |    | Gue |     |
| 4 | 38380207 | 38380207 |    | Gue |     |
| 4 | 40298925 | 40298925 |    | Nor |     |
| 4 | 40726093 | 40726093 |    | Her |     |
| 4 | 42080076 | 42080076 |    | Jer |     |
| 4 | 43621021 | 43621021 |    | Nor |     |
| 4 | 44424562 | 44424562 |    | Gue |     |
| 4 | 46183425 | 46183425 |    | Her |     |
| 4 | 46670940 | 46814875 | ZT |     |     |
| 4 | 47258707 | 47258707 |    | Gue |     |
| 4 | 48054791 | 48054791 |    | Gue |     |
| 4 | 49349163 | 49349163 |    | Her |     |
| 4 | 49385543 | 49385543 |    | Lim |     |
| 4 | 49740381 | 49740381 |    | Jer |     |
| 4 | 50167830 | 50167830 |    | Nor |     |
| 4 | 50293840 | 50293840 |    | Her |     |
| 4 | 52026595 | 52026595 |    | Her |     |
| 4 | 52954149 | 52954149 |    | Hol |     |
| 4 | 53001038 | 53001038 |    | Nor |     |
| 4 | 53122964 | 53122964 |    | Hol |     |
| 4 | 53122964 | 53122964 |    | Jer |     |
| 4 | 53896224 | 53896224 |    | Hol |     |
| 4 | 54074463 | 54074463 |    | Jer |     |
| 4 | 55050570 | 55134721 |    |     | Nel |
| 4 | 55257636 | 55443618 |    |     | Nel |
| 4 | 55564014 | 55653930 |    |     | Nel |
| 4 | 55912717 | 55912717 |    | Her |     |
| 4 | 56315518 | 56404051 |    |     | Nel |
| 4 | 56475874 | 56475874 |    | Hol |     |
| 4 | 56505005 | 56619245 |    |     | Nel |
| 4 | 56561489 | 56561489 |    | Nor |     |
| 4 | 56875012 | 56875012 |    | Nor |     |
| 4 | 57121371 | 57121371 |    | Hol |     |
| 4 | 57874268 | 57874268 |    | Jer |     |
| 4 | 58599517 | 58599517 |    | Gue |     |
| 4 | 59596296 | 59596296 |    | Nor |     |
| 4 | 61609813 | 61609813 |    | Hol |     |
| 4 | 63377248 | 63377248 |    | Bro |     |
| 4 | 63528542 | 63528542 |    | Lim |     |
| 4 | 64926156 | 64926156 |    | Gue |     |
| 4 | 65351239 | 65351239 |    | Bro |     |
| 4 | 65351239 | 65351239 |    | Hol |     |
| 4 | 65351239 | 65351239 |    | Lim |     |

|   |           |           |     |
|---|-----------|-----------|-----|
| 4 | 65469531  | 65469531  | Her |
| 4 | 67726145  | 67726145  | Gue |
| 4 | 68247759  | 68247759  | Hol |
| 4 | 68340015  | 68340015  | Lim |
| 4 | 69528746  | 69528746  | Hol |
| 4 | 70147152  | 70147152  | Gue |
| 4 | 70289114  | 70289114  | Lim |
| 4 | 70632396  | 70632396  | Nor |
| 4 | 71507654  | 71507654  | Gue |
| 4 | 71671560  | 71671560  | Her |
| 4 | 73518942  | 73518942  | Her |
| 4 | 75598840  | 75598840  | Her |
| 4 | 76141626  | 76141626  | Bro |
| 4 | 77730993  | 77730993  | Hol |
| 4 | 78061802  | 78061802  | Jer |
| 4 | 78704761  | 78704761  | Lim |
| 4 | 79324525  | 79324525  | Gue |
| 4 | 80381215  | 80381215  | Lim |
| 4 | 80595579  | 80595579  | Her |
| 4 | 81637676  | 81637676  | Ang |
| 4 | 81637676  | 81637676  | Nor |
| 4 | 81797539  | 81797539  | Lim |
| 4 | 82298398  | 82298398  | Ang |
| 4 | 83061026  | 83061026  | Hol |
| 4 | 83061026  | 83061026  | Nor |
| 4 | 83168596  | 83168596  | Ang |
| 4 | 83574715  | 83604127  | Gue |
| 4 | 83697713  | 83697713  | Jer |
| 4 | 84320005  | 84320005  | Bro |
| 4 | 84626367  | 84626367  | Her |
| 4 | 87027941  | 87027941  | Gue |
| 4 | 87706457  | 87706457  | Nor |
| 4 | 88213063  | 88213063  | Hol |
| 4 | 89360938  | 89360938  | Nor |
| 4 | 89946180  | 89946180  | Lim |
| 4 | 90134841  | 90134841  | Bro |
| 4 | 93277289  | 93277289  | Jer |
| 4 | 95629588  | 95629588  | Bro |
| 4 | 96169933  | 96169933  | Hol |
| 4 | 97052759  | 97052759  | Jer |
| 4 | 97873655  | 97873655  | Gue |
| 4 | 98262275  | 98262275  | Bro |
| 4 | 99106053  | 99106053  | Nor |
| 4 | 99256469  | 99256469  | Her |
| 4 | 100161336 | 100161336 | Hol |
| 4 | 100259038 | 100259038 | Nor |
| 4 | 101976538 | 101976538 | Ang |
| 4 | 102085712 | 102085712 | Gue |



|   |           |           |     |
|---|-----------|-----------|-----|
| 4 | 102213664 | 102213664 | Nor |
| 4 | 102827186 | 102827186 | Nor |
| 4 | 103519543 | 103519543 | Ang |
| 4 | 104102374 | 104102374 | Her |
| 4 | 105905928 | 105905928 | Lim |
| 4 | 106222170 | 106222170 | Nor |
| 4 | 107096645 | 107148814 | Her |
| 4 | 108177949 | 108177949 | Ang |
| 4 | 108177949 | 108177949 | Hol |
| 4 | 108177949 | 108177949 | Jer |
| 4 | 108554118 | 108554118 | Ang |
| 4 | 108835578 | 108835578 | Bro |
| 4 | 108863093 | 108863093 | Ang |
| 4 | 111134506 | 111134506 | Lim |
| 4 | 111714075 | 111714075 | Her |
| 4 | 111800401 | 111800401 | Gue |
| 4 | 112262940 | 112262940 | Nor |
| 4 | 112321244 | 112321244 | Her |
| 4 | 112385885 | 112385885 | Lim |
| 4 | 112520776 | 112520776 | Bro |
| 4 | 112520776 | 112520776 | Lim |
| 4 | 112669025 | 112669025 | Lim |
| 4 | 112975792 | 112975792 | Nor |
| 4 | 114337692 | 114337692 | Jer |
| 4 | 115150661 | 115150661 | Bro |
| 4 | 115274669 | 115274669 | Jer |
| 4 | 116352975 | 116352975 | Bro |
| 4 | 116457483 | 116457483 | Hol |
| 4 | 116525761 | 116525761 | Jer |
| 4 | 116650274 | 116650274 | Jer |
| 4 | 117459963 | 117459963 | Lim |
| 4 | 117524821 | 117524821 | Nor |
| 4 | 118015333 | 118015333 | Gue |
| 4 | 119875926 | 119875926 | Hol |
| 5 | 532145    | 532145    | Ang |
| 5 | 1780028   | 1780028   | Ang |
| 5 | 2226415   | 2226415   | Nor |
| 5 | 6249289   | 6249289   | Ang |
| 5 | 11575122  | 11575122  | Bro |
| 5 | 12172499  | 12172499  | Bro |
| 5 | 12241848  | 12241848  | Jer |
| 5 | 12435713  | 12435713  | Gue |
| 5 | 12435713  | 12435713  | Jer |
| 5 | 13203664  | 13203664  | Her |
| 5 | 13261705  | 13261705  | Bro |
| 5 | 15062606  | 15062606  | Lim |
| 5 | 15147209  | 15147209  | Ang |
| 5 | 15524211  | 15524211  | Hol |

|   |          |          |     |     |
|---|----------|----------|-----|-----|
| 5 | 15561728 | 15561728 | Bro |     |
| 5 | 15706452 | 15706452 | Lim |     |
| 5 | 16978964 | 16978964 | Ang |     |
| 5 | 16978964 | 16978964 | Gue |     |
| 5 | 16978964 | 16978964 | Hol |     |
| 5 | 17749424 | 17749424 | Ang |     |
| 5 | 17749424 | 17749424 | Hol |     |
| 5 | 17749424 | 17749424 | Jer |     |
| 5 | 18373081 | 18373081 | Jer |     |
| 5 | 20611530 | 20754669 |     | Guz |
| 5 | 20856908 | 21238822 |     | Guz |
| 5 | 20856908 | 20913188 |     | Nel |
| 5 | 21861283 | 21861283 | Gue |     |
| 5 | 22445252 | 22445252 | Jer |     |
| 5 | 22678637 | 22678637 | Gue |     |
| 5 | 23352672 | 23352672 | Lim |     |
| 5 | 24023395 | 24023395 | Gue |     |
| 5 | 24195453 | 24195453 | Hol |     |
| 5 | 24918518 | 25088771 |     | Nel |
| 5 | 27137119 | 27137119 | Ang |     |
| 5 | 29511503 | 29511503 | Bro |     |
| 5 | 29962857 | 29962857 | Hol |     |
| 5 | 31068358 | 31068358 | Hol |     |
| 5 | 31590800 | 32108697 |     | Nel |
| 5 | 31618030 | 31618030 | Her |     |
| 5 | 31690859 | 31690859 | Nor |     |
| 5 | 32151620 | 32151620 | Nor |     |
| 5 | 33453639 | 33453639 | Gue |     |
| 5 | 36507904 | 36677850 |     | Nel |
| 5 | 37736215 | 37736215 | Bro |     |
| 5 | 39183182 | 39498441 |     | Guz |
| 5 | 39293694 | 39462835 |     | Nel |
| 5 | 40553720 | 40864734 |     | Guz |
| 5 | 40646030 | 40788257 |     | Nel |
| 5 | 41855583 | 41855583 | Ang |     |
| 5 | 42276968 | 42276968 | Lim |     |
| 5 | 42387005 | 42387005 | Gue |     |
| 5 | 42810659 | 42810659 | Lim |     |
| 5 | 42835886 | 43384479 |     | Gir |
| 5 | 43494691 | 43733326 |     | Gir |
| 5 | 43498222 | 43498222 | Jer |     |
| 5 | 44346949 | 44346949 | Ang |     |
| 5 | 45749110 | 45807839 |     | Gir |
| 5 | 46183975 | 46183975 | Ang |     |
| 5 | 46183975 | 46183975 | Hol |     |
| 5 | 46183975 | 46183975 | Jer |     |
| 5 | 46317932 | 46317932 | Her |     |
| 5 | 46516881 | 46516881 | Hol |     |

|   |          |          |    |     |     |
|---|----------|----------|----|-----|-----|
| 5 | 46766079 | 47022326 |    |     | Guz |
| 5 | 47545721 | 47545721 |    | Ang |     |
| 5 | 47545721 | 47545721 |    | Gue |     |
| 5 | 47545721 | 47545721 |    | Hol |     |
| 5 | 48229556 | 48336996 | ZT |     |     |
| 5 | 49701652 | 49701652 |    | Nor |     |
| 5 | 49783026 | 49783026 |    | Her |     |
| 5 | 50009234 | 50549666 |    |     | Guz |
| 5 | 50326119 | 50549666 |    |     | Nel |
| 5 | 51245751 | 51358939 |    |     | Gir |
| 5 | 51276764 | 51276764 |    | Her |     |
| 5 | 51276764 | 51276764 |    | Jer |     |
| 5 | 51307855 | 51307855 |    | Hol |     |
| 5 | 51531787 | 51818460 |    |     | Gir |
| 5 | 52127055 | 52127055 |    | Nor |     |
| 5 | 52740959 | 52740959 |    | Lim |     |
| 5 | 52806574 | 52806574 |    | Nor |     |
| 5 | 53554507 | 53554507 |    | Gue |     |
| 5 | 53733336 | 53733336 |    | Hol |     |
| 5 | 55881766 | 56049790 | ZT |     |     |
| 5 | 56187224 | 56801729 | ZT |     |     |
| 5 | 56684875 | 56684875 |    | Hol |     |
| 5 | 56809677 | 56899118 |    |     | Gir |
| 5 | 57010135 | 57335801 |    |     | Gir |
| 5 | 57175000 | 57335801 |    |     | Nel |
| 5 | 57254378 | 57335801 |    |     | Guz |
| 5 | 57475894 | 57754977 |    |     | Guz |
| 5 | 57475894 | 57643602 |    |     | Nel |
| 5 | 57937432 | 57937432 |    | Bro |     |
| 5 | 58344936 | 58344936 |    | Jer |     |
| 5 | 58480291 | 58480291 |    | Hol |     |
| 5 | 58513997 | 58868784 |    |     | Nel |
| 5 | 58545475 | 58868784 |    |     | Gir |
| 5 | 59268092 | 59268092 |    |     | Gir |
| 5 | 59268092 | 59268092 |    |     | Nel |
| 5 | 59332478 | 59332478 |    | Lim |     |
| 5 | 59686148 | 59768602 |    |     | Gir |
| 5 | 59686148 | 59768602 |    |     | Nel |
| 5 | 59942136 | 59942136 |    |     | Gir |
| 5 | 60090401 | 60090401 |    |     | Gir |
| 5 | 60214497 | 60214497 |    |     | Gir |
| 5 | 60241190 | 60241190 |    | Gue |     |
| 5 | 60602065 | 60642347 |    | Cha |     |
| 5 | 61552763 | 61552763 |    | Hol |     |
| 5 | 61798086 | 61798086 |    | Ang |     |
| 5 | 61827732 | 62260477 |    |     | Gir |
| 5 | 61870300 | 62438598 |    |     | Nel |
| 5 | 61896542 | 61969069 |    | Hol |     |

|   |          |          |     |     |
|---|----------|----------|-----|-----|
| 5 | 61990458 | 62345270 |     | Guz |
| 5 | 62094189 | 62094189 | Bro |     |
| 5 | 62094189 | 62094189 | Hol |     |
| 5 | 62198999 | 62198999 | Bro |     |
| 5 | 62198999 | 62198999 | Hol |     |
| 5 | 62322675 | 62322675 | Lim |     |
| 5 | 62932240 | 62932240 | Her |     |
| 5 | 63171539 | 63171539 | Bro |     |
| 5 | 65618331 | 65618331 | Jer |     |
| 5 | 67239744 | 67239744 |     | Gir |
| 5 | 67341443 | 67854189 |     | Gir |
| 5 | 68037433 | 68037433 | Gue |     |
| 5 | 68088287 | 69541923 |     | Gir |
| 5 | 69276358 | 69276358 | Nor |     |
| 5 | 69648685 | 70077918 |     | Gir |
| 5 | 69745832 | 69745832 | Jer |     |
| 5 | 70182071 | 70234777 |     | Gir |
| 5 | 70236734 | 70236734 | Lim |     |
| 5 | 70278553 | 70278553 | Jer |     |
| 5 | 70338965 | 70338965 |     | Gir |
| 5 | 70458662 | 70458662 |     | Gir |
| 5 | 70568914 | 70568914 |     | Gir |
| 5 | 70680437 | 71119866 |     | Gir |
| 5 | 71182243 | 71182243 | Gue |     |
| 5 | 72117069 | 72117069 | Ang |     |
| 5 | 72160661 | 72427500 |     | Gir |
| 5 | 72805361 | 72995040 |     | Gir |
| 5 | 73226825 | 73226825 | Lim |     |
| 5 | 73632210 | 73632210 | Jer |     |
| 5 | 74229804 | 74229804 | Bro |     |
| 5 | 74229804 | 74229804 | Gue |     |
| 5 | 75961587 | 75961587 | Lim |     |
| 5 | 76102522 | 76102522 | Ang |     |
| 5 | 76653989 | 76653989 | Gue |     |
| 5 | 76653989 | 76653989 | Nor |     |
| 5 | 77345145 | 77345145 | Nor |     |
| 5 | 80052274 | 80052274 | Ang |     |
| 5 | 80458550 | 80458550 | Lim |     |
| 5 | 82548748 | 82548748 | Hol |     |
| 5 | 82779995 | 82779995 | Lim |     |
| 5 | 82951695 | 82951695 | Bro |     |
| 5 | 85418307 | 85418307 | Bro |     |
| 5 | 86704345 | 86704345 | Her |     |
| 5 | 87508398 | 87508398 | Bro |     |
| 5 | 87563709 | 87563709 | Her |     |
| 5 | 88483657 | 88483657 | Ang |     |
| 5 | 89339202 | 89339202 | Her |     |
| 5 | 89512928 | 89512928 | Nor |     |

|   |           |           |     |
|---|-----------|-----------|-----|
| 5 | 91152852  | 91197726  | Nor |
| 5 | 91449572  | 91449572  | Her |
| 5 | 91467698  | 91467698  | Ang |
| 5 | 92403004  | 92403004  | Jer |
| 5 | 96070058  | 96070058  | Jer |
| 5 | 96430014  | 96430014  | Hol |
| 5 | 97652740  | 97652740  | Ang |
| 5 | 98393443  | 98393443  | Nor |
| 5 | 98802828  | 98802828  | Jer |
| 5 | 99341425  | 99341425  | Lim |
| 5 | 100226474 | 100226474 | Gue |
| 5 | 100821035 | 100821035 | Bro |
| 5 | 100934878 | 100934878 | Ang |
| 5 | 102689791 | 102689791 | Hol |
| 5 | 102689791 | 102689791 | Jer |
| 5 | 102760399 | 102760399 | Gue |
| 5 | 102826491 | 102826491 | Ang |
| 5 | 103104527 | 103104527 | Her |
| 5 | 103984545 | 103984545 | Her |
| 5 | 105116043 | 105116043 | Hol |
| 5 | 105173591 | 105173591 | Bro |
| 5 | 105361302 | 105361302 | Lim |
| 5 | 106744927 | 106744927 | Gue |
| 5 | 107041248 | 107041248 | Lim |
| 5 | 107209045 | 107209045 | Lim |
| 5 | 107671017 | 107671017 | Lim |
| 5 | 107704991 | 107704991 | Bro |
| 5 | 107704991 | 107946258 | Cha |
| 5 | 107916169 | 107916169 | Lim |
| 5 | 107977613 | 107977613 | Hol |
| 5 | 108172899 | 108172899 | Lim |
| 5 | 108400665 | 108400665 | Gue |
| 5 | 109376304 | 109376304 | Jer |
| 5 | 109711617 | 109711617 | Bro |
| 5 | 110046386 | 110046386 | Gue |
| 5 | 112825269 | 112825269 | Ang |
| 5 | 112906879 | 112906879 | Gue |
| 5 | 113163784 | 113163784 | Ang |
| 5 | 113163784 | 113163784 | Gue |
| 5 | 113491995 | 113491995 | Her |
| 5 | 113744682 | 113744682 | Bro |
| 5 | 113744682 | 113744682 | Her |
| 5 | 114699559 | 114699559 | Hol |
| 5 | 114958931 | 114958931 | Lim |
| 5 | 115171406 | 115171406 | Hol |
| 5 | 115308130 | 115308130 | Gue |
| 5 | 117917533 | 117917533 | Jer |
| 5 | 118571958 | 118571958 | Hol |

|   |           |           |     |     |
|---|-----------|-----------|-----|-----|
| 5 | 118719909 | 118719909 | Gue |     |
| 5 | 118719909 | 118719909 | Nor |     |
| 5 | 120403003 | 120403003 | Nor |     |
| 5 | 120973535 | 120973535 | Ang |     |
| 5 | 120973535 | 120973535 | Hol |     |
| 6 | 684934    | 684934    | Her |     |
| 6 | 1004585   | 1004585   | Nor |     |
| 6 | 1405878   | 1405878   | Gue |     |
| 6 | 4234476   | 4234476   | Jer |     |
| 6 | 4837150   | 4837150   | Nor |     |
| 6 | 6881832   | 6881832   | Nor |     |
| 6 | 7426584   | 7426584   | Bro |     |
| 6 | 8297644   | 8297644   | Ang |     |
| 6 | 10287413  | 10287413  | Her |     |
| 6 | 10369158  | 10369158  | Bro |     |
| 6 | 10869692  | 11186217  |     | Gir |
| 6 | 10958234  | 10958234  | Ang |     |
| 6 | 12693539  | 12693539  | Jer |     |
| 6 | 12797614  | 12797614  | Ang |     |
| 6 | 13132216  | 13132216  | Lim |     |
| 6 | 16547650  | 16577676  |     | Gir |
| 6 | 16850753  | 16850753  | Bro |     |
| 6 | 17237816  | 17886829  |     | Guz |
| 6 | 17512361  | 17886829  |     | Nel |
| 6 | 17544456  | 17544456  | Her |     |
| 6 | 17758788  | 17758788  | Hol |     |
| 6 | 18035285  | 18609964  |     | Guz |
| 6 | 18035285  | 18398817  |     | Nel |
| 6 | 18397886  | 18397886  | Nor |     |
| 6 | 18495302  | 18495302  | Jer |     |
| 6 | 18576650  | 18576650  | Bro |     |
| 6 | 20658721  | 20658721  | Nor |     |
| 6 | 20769990  | 20769990  | Hol |     |
| 6 | 21034521  | 21034521  | Her |     |
| 6 | 22577502  | 22577502  | Lim |     |
| 6 | 23166766  | 23166766  | Hol |     |
| 6 | 23429169  | 23429169  | Bro |     |
| 6 | 24238233  | 24238233  | Nor |     |
| 6 | 25648085  | 25648085  | Jer |     |
| 6 | 25860295  | 25860295  | Jer |     |
| 6 | 26500724  | 26500724  | Gue |     |
| 6 | 27196752  | 27196752  | Ang |     |
| 6 | 27927608  | 27927608  | Nor |     |
| 6 | 28810002  | 28810002  | Nor |     |
| 6 | 30181447  | 30181447  | Nor |     |
| 6 | 30270520  | 30270520  | Hol |     |
| 6 | 30679552  | 30679552  | Ang |     |
| 6 | 30679552  | 30679552  | Nor |     |

|   |          |          |     |
|---|----------|----------|-----|
| 6 | 30751312 | 30751312 | Jer |
| 6 | 30893089 | 30893089 | Gue |
| 6 | 31210404 | 31210404 | Ang |
| 6 | 31671451 | 31671451 | Jer |
| 6 | 32067092 | 32067092 | Bro |
| 6 | 32208164 | 32208164 | Bro |
| 6 | 32605838 | 32605838 | Hol |
| 6 | 33302947 | 33302947 | Bro |
| 6 | 35787317 | 35787317 | Her |
| 6 | 35854675 | 35854675 | Nor |
| 6 | 35922378 | 35922378 | Gue |
| 6 | 37141253 | 37141253 | Nor |
| 6 | 38321808 | 38321808 | Ang |
| 6 | 38369497 | 38369497 | Gue |
| 6 | 38732667 | 38732667 | Bro |
| 6 | 39069719 | 39069719 | Nor |
| 6 | 40098301 | 40098301 | Lim |
| 6 | 40448848 | 40448848 | Jer |
| 6 | 40580921 | 40580921 | Jer |
| 6 | 41983400 | 41983400 | Hol |
| 6 | 42714287 | 42714287 | Bro |
| 6 | 43254403 | 43254403 | Jer |
| 6 | 43590568 | 43590568 | Gue |
| 6 | 43859732 | 43859732 | Ang |
| 6 | 43859732 | 43859732 | Gue |
| 6 | 44228217 | 44228217 | Gue |
| 6 | 44372550 | 44372550 | Nor |
| 6 | 44614641 | 44614641 | Nor |
| 6 | 44714358 | 44714358 | Jer |
| 6 | 45264193 | 45264193 | Gue |
| 6 | 46259614 | 46259614 | Her |
| 6 | 46556246 | 46556246 | Ang |
| 6 | 46931105 | 46931105 | Her |
| 6 | 47612084 | 47612084 | Jer |
| 6 | 47743983 | 47743983 | Nor |
| 6 | 47999518 | 47999518 | Nor |
| 6 | 48054147 | 48054147 | Her |
| 6 | 48171183 | 48171183 | Gue |
| 6 | 48755138 | 48755138 | Jer |
| 6 | 49942445 | 49942445 | Hol |
| 6 | 50407385 | 50407385 | Gue |
| 6 | 55830448 | 55830448 | Hol |
| 6 | 56079069 | 56079069 | Nor |
| 6 | 57005400 | 57005400 | Bro |
| 6 | 57331206 | 57331206 | Her |
| 6 | 57679318 | 57679318 | Bro |
| 6 | 58411107 | 58411107 | Gue |
| 6 | 58679474 | 58679474 | Nor |

|   |          |          |     |     |
|---|----------|----------|-----|-----|
| 6 | 58893067 | 58893067 | Her |     |
| 6 | 59358794 | 59358794 | Nor |     |
| 6 | 60513152 | 60513152 | Hol |     |
| 6 | 62144436 | 62144436 | Jer |     |
| 6 | 64071026 | 64071026 | Bro |     |
| 6 | 64428159 | 64775155 |     | Gir |
| 6 | 65363458 | 65363458 |     | Gir |
| 6 | 65491643 | 65917106 |     | Gir |
| 6 | 65578924 | 65578924 | Bro |     |
| 6 | 65578924 | 65578924 | Hol |     |
| 6 | 66029830 | 67324212 |     | Gir |
| 6 | 66228416 | 66228416 | Nor |     |
| 6 | 66554508 | 66554508 | Her |     |
| 6 | 66840522 | 66840522 | Bro |     |
| 6 | 67726209 | 68650753 |     | Gir |
| 6 | 67865555 | 67865555 | Lim |     |
| 6 | 67965922 | 68615393 |     | Guz |
| 6 | 68551449 | 68551449 | Bro |     |
| 6 | 68579990 | 69047811 | Cha |     |
| 6 | 68848548 | 68848548 | Bro |     |
| 6 | 68848548 | 68848548 | Gue |     |
| 6 | 68952101 | 68952101 | Lim |     |
| 6 | 69246461 | 69879993 | Cha |     |
| 6 | 69655525 | 69655525 | Bro |     |
| 6 | 69655525 | 69655525 | Gue |     |
| 6 | 69772367 | 69772367 | Bro |     |
| 6 | 69772367 | 69772367 | Gue |     |
| 6 | 69832241 | 69832241 | Lim |     |
| 6 | 69924213 | 70108109 |     | Gir |
| 6 | 69924213 | 69924213 | Gue |     |
| 6 | 70074322 | 70074322 | Hol |     |
| 6 | 70142390 | 70142390 | Bro |     |
| 6 | 70142390 | 71046728 | Cha |     |
| 6 | 70250655 | 70250655 | Nor |     |
| 6 | 70304717 | 70304717 | Bro |     |
| 6 | 70304717 | 70304717 | Gue |     |
| 6 | 70369018 | 70729075 |     | Guz |
| 6 | 70397767 | 70421237 | Ang |     |
| 6 | 70552634 | 70552634 | Bro |     |
| 6 | 70552634 | 70552634 | Gue |     |
| 6 | 70663881 | 70704748 | Lim |     |
| 6 | 70777638 | 70777638 | Bro |     |
| 6 | 70777638 | 70777638 | Gue |     |
| 6 | 70825726 | 70825726 | Ang |     |
| 6 | 70878324 | 70909347 | Bro |     |
| 6 | 70878324 | 70909347 | Gue |     |
| 6 | 71111976 | 71168557 |     | Gir |
| 6 | 71289939 | 71709066 |     | Gir |



|   |          |          |     |     |
|---|----------|----------|-----|-----|
| 6 | 71289939 | 71709066 |     | Guz |
| 6 | 71293044 | 71293044 | Nor |     |
| 6 | 71394063 | 71709066 |     | Nel |
| 6 | 71432119 | 71453049 | Lim |     |
| 6 | 71453049 | 71453049 | Jer |     |
| 6 | 71849761 | 72247851 |     | Gir |
| 6 | 71849761 | 72755638 |     | Guz |
| 6 | 71849761 | 72023200 |     | Nel |
| 6 | 72589945 | 72589945 | Lim |     |
| 6 | 72649477 | 72812225 |     | Nel |
| 6 | 72652172 | 72652172 | Hol |     |
| 6 | 72736904 | 72907971 | Cha |     |
| 6 | 72736904 | 72736904 | Her |     |
| 6 | 72837455 | 72907971 | Nor |     |
| 6 | 73878270 | 73878270 | Gue |     |
| 6 | 74672294 | 74672294 | Bro |     |
| 6 | 75337457 | 75337457 | Her |     |
| 6 | 75539962 | 75615442 | Cha |     |
| 6 | 75615442 | 75615442 | Gue |     |
| 6 | 76343192 | 76343192 | Gue |     |
| 6 | 76717175 | 76717175 | Lim |     |
| 6 | 77016454 | 77016454 | Ang |     |
| 6 | 77016454 | 77016454 | Gue |     |
| 6 | 77016454 | 77016454 | Hol |     |
| 6 | 77170401 | 77170401 | Gue |     |
| 6 | 77458333 | 77458333 | Lim |     |
| 6 | 77654694 | 77654694 | Her |     |
| 6 | 77770651 | 77770651 | Bro |     |
| 6 | 78106873 | 78421672 |     | Nel |
| 6 | 78818101 | 78818101 | Jer |     |
| 6 | 80303879 | 80303879 | Lim |     |
| 6 | 81086466 | 81086466 | Bro |     |
| 6 | 81195717 | 81195717 | Ang |     |
| 6 | 81362585 | 81362585 | Gue |     |
| 6 | 82395727 | 82395727 | Gue |     |
| 6 | 83419616 | 83419616 | Jer |     |
| 6 | 83799011 | 83799011 | Lim |     |
| 6 | 83988527 | 83988527 | Lim |     |
| 6 | 84851488 | 84851488 | Jer |     |
| 6 | 84874750 | 84874750 | Lim |     |
| 6 | 85093387 | 85093387 | Her |     |
| 6 | 85452843 | 85452843 | Ang |     |
| 6 | 86210585 | 86210585 | Hol |     |
| 6 | 87009162 | 87009162 | Gue |     |
| 6 | 87528247 | 87528247 | Lim |     |
| 6 | 88085965 | 88085965 | Gue |     |
| 6 | 88407205 | 88407205 | Bro |     |
| 6 | 88973755 | 88973755 | Bro |     |

|   |           |           |     |     |
|---|-----------|-----------|-----|-----|
| 6 | 88973755  | 89110574  | Cha |     |
| 6 | 89357777  | 89357777  | Hol |     |
| 6 | 89357777  | 89357777  | Jer |     |
| 6 | 89586128  | 89586128  | Lim |     |
| 6 | 90486780  | 90486780  | Her |     |
| 6 | 90695950  | 90695950  | Gue |     |
| 6 | 90816708  | 90816708  | Her |     |
| 6 | 92623916  | 92623916  | Jer |     |
| 6 | 93107752  | 93107752  | Nor |     |
| 6 | 93661955  | 93661955  | Lim |     |
| 6 | 95701043  | 95701043  | Her |     |
| 6 | 95868577  | 95868577  | Lim |     |
| 6 | 96133577  | 96133577  | Gue |     |
| 6 | 97048566  | 97048566  | Hol |     |
| 6 | 97295497  | 97295497  | Her |     |
| 6 | 97874422  | 97874422  | Hol |     |
| 6 | 98620384  | 98620384  | Nor |     |
| 6 | 99741981  | 99741981  | Her |     |
| 6 | 102043097 | 102043097 | Lim |     |
| 6 | 102354018 | 102354018 | Ang |     |
| 6 | 102656425 | 102656425 | Her |     |
| 6 | 103684904 | 103684904 | Gue |     |
| 6 | 103684904 | 103684904 | Jer |     |
| 6 | 104147101 | 104147101 | Her |     |
| 6 | 104428788 | 104428788 | Ang |     |
| 6 | 104896770 | 104896770 | Hol |     |
| 6 | 104995710 | 104995710 | Ang |     |
| 6 | 105082901 | 105082901 | Bro |     |
| 6 | 105282590 | 105282590 | Nor |     |
| 6 | 105476912 | 105476912 | Lim |     |
| 6 | 105647257 | 105647257 | Nor |     |
| 6 | 106195779 | 106195779 | Jer |     |
| 6 | 106953242 | 106953242 | Hol |     |
| 6 | 106953242 | 106953242 | Jer |     |
| 6 | 107423566 | 107423566 | Her |     |
| 6 | 108140878 | 108140878 | Bro |     |
| 6 | 108355687 | 108355687 | Ang |     |
| 6 | 109897928 | 109897928 | Hol |     |
| 6 | 109997823 | 110151219 |     | Gir |
| 6 | 110099567 | 110099567 | Lim |     |
| 6 | 110262552 | 110336208 | Jer |     |
| 6 | 110452712 | 110898941 | Cha |     |
| 6 | 110656909 | 110656909 | Ang |     |
| 6 | 111040377 | 111040377 | Gue |     |
| 6 | 111132017 | 111132017 | Her |     |
| 6 | 111382589 | 111382589 | Bro |     |
| 6 | 111448459 | 111448459 | Gue |     |
| 6 | 111532693 | 111532693 | Ang |     |

|   |           |           |    |     |
|---|-----------|-----------|----|-----|
| 6 | 111532693 | 111532693 |    | Hol |
| 6 | 111737970 | 111737970 |    | Jer |
| 6 | 113194494 | 113194494 |    | Bro |
| 6 | 113405516 | 113405516 |    | Jer |
| 6 | 114223059 | 114223059 |    | Ang |
| 6 | 114626046 | 114626046 |    | Bro |
| 6 | 114626046 | 114626046 |    | Gue |
| 6 | 114709329 | 114709329 |    | Ang |
| 6 | 114709329 | 114709329 |    | Hol |
| 6 | 116433715 | 116433715 |    | Ang |
| 6 | 117097825 | 117097825 |    | Jer |
| 6 | 117514172 | 117514172 |    | Bro |
| 6 | 119189552 | 119189552 |    | Her |
| 6 | 119189552 | 119189552 |    | Hol |
| 7 | 3408345   | 3408345   |    | Nor |
| 7 | 3764385   | 3764385   |    | Her |
| 7 | 4408245   | 4408245   |    | Ang |
| 7 | 5535767   | 5535767   |    | Her |
| 7 | 5670723   | 5670723   |    | Her |
| 7 | 6391481   | 6391481   |    | Ang |
| 7 | 8957328   | 8957328   |    | Her |
| 7 | 9574967   | 9574967   |    | Her |
| 7 | 12396999  | 12396999  |    | Nor |
| 7 | 14437027  | 14437027  |    | Jer |
| 7 | 14591281  | 14591281  |    | Gue |
| 7 | 14950181  | 14950181  |    | Gue |
| 7 | 15238915  | 15238915  |    | Jer |
| 7 | 15824296  | 15824296  |    | Ang |
| 7 | 16377983  | 16377983  |    | Her |
| 7 | 17567301  | 17567301  |    | Gue |
| 7 | 18043992  | 18043992  |    | Bro |
| 7 | 19347072  | 19347072  |    | Hol |
| 7 | 19752701  | 19752701  |    | Hol |
| 7 | 19752701  | 19752701  |    | Nor |
| 7 | 21008805  | 21606667  | ZT |     |
| 7 | 21545270  | 21545270  |    | Gue |
| 7 | 21663575  | 21663575  |    | Gue |
| 7 | 21732061  | 21732061  |    | Lim |
| 7 | 21979132  | 21979132  |    | Hol |
| 7 | 22936186  | 22936186  |    | Jer |
| 7 | 23078152  | 23078152  |    | Gue |
| 7 | 24589644  | 24589644  |    | Jer |
| 7 | 25638909  | 25638909  |    | Jer |
| 7 | 26211382  | 26211382  |    | Lim |
| 7 | 26418683  | 26418683  |    | Nor |
| 7 | 27694291  | 27694291  |    | Bro |
| 7 | 27746668  | 27746668  |    | Gue |
| 7 | 28079542  | 28079542  |    | Nor |

|   |          |          |    |     |     |
|---|----------|----------|----|-----|-----|
| 7 | 28188631 | 28188631 |    | Lim |     |
| 7 | 28352637 | 28352637 |    | Her |     |
| 7 | 29823611 | 29823611 |    | Lim |     |
| 7 | 30269254 | 30269254 |    | Gue |     |
| 7 | 30776329 | 30776329 |    | Ang |     |
| 7 | 30916696 | 30916696 |    | Ang |     |
| 7 | 31048900 | 31048900 |    | Ang |     |
| 7 | 32244753 | 32244753 |    | Nor |     |
| 7 | 32299740 | 32299740 |    | Jer |     |
| 7 | 32356476 | 32441261 |    |     | Nel |
| 7 | 32362945 | 32362945 |    | Ang |     |
| 7 | 32553636 | 32553636 |    |     | Nel |
| 7 | 32565544 | 32565544 |    | Nor |     |
| 7 | 33072433 | 33072433 |    | Gue |     |
| 7 | 35583298 | 35727864 |    |     | Nel |
| 7 | 35646155 | 35646155 |    | Hol |     |
| 7 | 35801918 | 35801918 |    | Hol |     |
| 7 | 35801918 | 35801918 |    | Nor |     |
| 7 | 37064981 | 37064981 |    | Nor |     |
| 7 | 37620911 | 37620911 |    | Her |     |
| 7 | 39408588 | 39408588 |    | Hol |     |
| 7 | 41560760 | 41560760 |    | Gue |     |
| 7 | 41800624 | 41800624 |    | Nor |     |
| 7 | 41988894 | 41988894 |    | Jer |     |
| 7 | 45456287 | 45456287 |    | Hol |     |
| 7 | 46821712 | 46821712 |    | Lim |     |
| 7 | 47299497 | 47859329 | ZT |     |     |
| 7 | 47559314 | 47559314 |    | Lim |     |
| 7 | 48465451 | 48465451 |    | Bro |     |
| 7 | 48465451 | 48465451 |    | Hol |     |
| 7 | 48531566 | 48531566 |    | Lim |     |
| 7 | 48675923 | 48675923 |    | Gue |     |
| 7 | 48976487 | 49339126 |    | Cha |     |
| 7 | 48976487 | 48976487 |    | Gue |     |
| 7 | 49043281 | 49043281 |    | Ang |     |
| 7 | 49339126 | 49339126 |    | Lim |     |
| 7 | 49604191 | 49604191 |    | Gue |     |
| 7 | 49757631 | 49757631 |    | Her |     |
| 7 | 50000591 | 50000591 |    | Lim |     |
| 7 | 50083726 | 50083726 |    | Gue |     |
| 7 | 50207714 | 50207714 |    | Hol |     |
| 7 | 50359286 | 50359286 |    | Jer |     |
| 7 | 50417918 | 50417918 |    | Hol |     |
| 7 | 50945085 | 50945085 |    | Bro |     |
| 7 | 50945085 | 50945085 |    | Hol |     |
| 7 | 50951861 | 52544266 | ZT |     |     |
| 7 | 51007922 | 51273470 |    | Cha |     |
| 7 | 51065526 | 51065526 |    | Gue |     |

|   |          |          |    |     |     |
|---|----------|----------|----|-----|-----|
| 7 | 51923355 | 52518362 |    |     | Gir |
| 7 | 51938829 | 51938829 |    | Nor |     |
| 7 | 52676102 | 53757384 | ZT |     |     |
| 7 | 53314454 | 53738523 |    | Cha |     |
| 7 | 53627815 | 53627815 |    | Ang |     |
| 7 | 53984004 | 54160135 |    |     | Guz |
| 7 | 55413032 | 55855334 |    | Cha |     |
| 7 | 55560135 | 55560135 |    | Jer |     |
| 7 | 55657740 | 55869106 |    |     | Guz |
| 7 | 55699270 | 55699270 |    | Gue |     |
| 7 | 55699899 | 55869106 |    |     | Nel |
| 7 | 55723868 | 55723868 |    | Jer |     |
| 7 | 55990245 | 56063642 |    |     | Guz |
| 7 | 55990245 | 56038711 |    |     | Nel |
| 7 | 56636311 | 56636311 |    | Lim |     |
| 7 | 57015697 | 57015697 |    | Jer |     |
| 7 | 60413422 | 60413422 |    | Gue |     |
| 7 | 60930457 | 60930457 |    | Gue |     |
| 7 | 60930457 | 60930457 |    | Nor |     |
| 7 | 61142271 | 61142271 |    | Her |     |
| 7 | 61220348 | 61220348 |    | Hol |     |
| 7 | 61658196 | 61658196 |    | Nor |     |
| 7 | 62026556 | 62026556 |    | Lim |     |
| 7 | 62951920 | 62951920 |    | Lim |     |
| 7 | 63319085 | 63319085 |    | Hol |     |
| 7 | 63567466 | 63567466 |    | Bro |     |
| 7 | 64315456 | 64315456 |    | Ang |     |
| 7 | 64513354 | 64513354 |    | Gue |     |
| 7 | 64714612 | 64714612 |    | Nor |     |
| 7 | 67576213 | 67576213 |    | Nor |     |
| 7 | 68201746 | 68201746 |    | Bro |     |
| 7 | 68262706 | 68262706 |    | Jer |     |
| 7 | 68702530 | 68702530 |    | Nor |     |
| 7 | 69243391 | 69243391 |    | Lim |     |
| 7 | 69403803 | 69403803 |    | Her |     |
| 7 | 69507347 | 69507347 |    | Gue |     |
| 7 | 70988849 | 70988849 |    | Her |     |
| 7 | 71089100 | 71089100 |    | Lim |     |
| 7 | 71293075 | 71293075 |    | Hol |     |
| 7 | 71697239 | 71697239 |    | Hol |     |
| 7 | 72563514 | 72563514 |    | Her |     |
| 7 | 72899435 | 72899435 |    | Jer |     |
| 7 | 73155099 | 73155099 |    | Jer |     |
| 7 | 74568754 | 74568754 |    | Nor |     |
| 7 | 75825484 | 75825484 |    | Her |     |
| 7 | 76994051 | 76994051 |    | Bro |     |
| 7 | 77027187 | 77027187 |    | Lim |     |
| 7 | 77141024 | 77141024 |    | Bro |     |

|   |           |           |     |
|---|-----------|-----------|-----|
| 7 | 77725073  | 77725073  | Hol |
| 7 | 77725073  | 77725073  | Nor |
| 7 | 80553574  | 80553574  | Ang |
| 7 | 81706317  | 81706317  | Nor |
| 7 | 82391192  | 82391192  | Lim |
| 7 | 82756535  | 82756535  | Bro |
| 7 | 82795447  | 82795447  | Gue |
| 7 | 83646180  | 83646180  | Bro |
| 7 | 84023632  | 84023632  | Jer |
| 7 | 84561462  | 84561462  | Hol |
| 7 | 84693489  | 84693489  | Bro |
| 7 | 85408031  | 85408031  | Lim |
| 7 | 86484464  | 86484464  | Lim |
| 7 | 86812524  | 86812524  | Her |
| 7 | 87000448  | 87000448  | Bro |
| 7 | 87481184  | 87481184  | Hol |
| 7 | 87681984  | 87681984  | Nor |
| 7 | 88413966  | 88413966  | Ang |
| 7 | 88632985  | 88632985  | Lim |
| 7 | 90358476  | 90358476  | Bro |
| 7 | 91619336  | 91619336  | Ang |
| 7 | 91619336  | 91619336  | Hol |
| 7 | 92639709  | 92639709  | Ang |
| 7 | 92685811  | 92685811  | Lim |
| 7 | 92950866  | 92950866  | Gue |
| 7 | 94052461  | 94052461  | Bro |
| 7 | 94796489  | 94796489  | Ang |
| 7 | 95720431  | 95720431  | Ang |
| 7 | 96523316  | 96523316  | Bro |
| 7 | 97732454  | 97732454  | Bro |
| 7 | 97954254  | 97954254  | Lim |
| 7 | 98044495  | 98044495  | Nor |
| 7 | 98711109  | 98711109  | Ang |
| 7 | 98893611  | 98893611  | Jer |
| 7 | 99177441  | 99177441  | Her |
| 7 | 99967071  | 99967071  | Bro |
| 7 | 100270303 | 100270303 | Nor |
| 7 | 100935977 | 100935977 | Her |
| 7 | 102320223 | 102320223 | Her |
| 7 | 103371336 | 103371336 | Gue |
| 7 | 104127595 | 104127595 | Lim |
| 7 | 104241239 | 104241239 | Lim |
| 7 | 104290665 | 104290665 | Bro |
| 7 | 104402974 | 104402974 | Lim |
| 7 | 106734846 | 106734846 | Gue |
| 7 | 107551125 | 107551125 | Lim |
| 7 | 107939136 | 107939136 | Jer |
| 7 | 108807769 | 108807769 | Hol |

|   |           |           |     |     |
|---|-----------|-----------|-----|-----|
| 7 | 109138859 | 109138859 | Jer |     |
| 7 | 109285657 | 109285657 | Bro |     |
| 7 | 109697318 | 109697318 | Her |     |
| 7 | 110125602 | 110125602 | Ang |     |
| 7 | 110125602 | 110125602 | Jer |     |
| 7 | 110744040 | 110744040 | Hol |     |
| 7 | 111090063 | 111090063 | Her |     |
| 7 | 111527301 | 111527301 | Nor |     |
| 7 | 112021719 | 112021719 | Bro |     |
| 8 | 227611    | 356238    |     | Nel |
| 8 | 807843    | 807843    | Jer |     |
| 8 | 1393934   | 1393934   | Jer |     |
| 8 | 2400846   | 2400846   | Bro |     |
| 8 | 4207450   | 4207450   | Her |     |
| 8 | 5083689   | 5083689   | Her |     |
| 8 | 5580213   | 5580213   | Ang |     |
| 8 | 6088202   | 6088202   | Lim |     |
| 8 | 6444437   | 6444437   | Her |     |
| 8 | 7456372   | 7456372   | Her |     |
| 8 | 7456372   | 7456372   | Jer |     |
| 8 | 7745692   | 7745692   | Bro |     |
| 8 | 9290785   | 9290785   | Gue |     |
| 8 | 9615972   | 9657727   |     | Gir |
| 8 | 10383387  | 10383387  | Nor |     |
| 8 | 11383695  | 11383695  | Lim |     |
| 8 | 11658773  | 11658773  | Jer |     |
| 8 | 11713177  | 11713177  | Her |     |
| 8 | 13148140  | 13148140  | Jer |     |
| 8 | 15848671  | 15848671  | Bro |     |
| 8 | 15996735  | 15996735  | Hol |     |
| 8 | 16910644  | 16910644  | Ang |     |
| 8 | 17446440  | 17446440  | Hol |     |
| 8 | 17486491  | 17486491  | Bro |     |
| 8 | 19208229  | 19208229  | Her |     |
| 8 | 20329496  | 20329496  | Gue |     |
| 8 | 22308841  | 22308841  | Ang |     |
| 8 | 22919820  | 22919820  | Her |     |
| 8 | 23168545  | 23168545  | Jer |     |
| 8 | 23290934  | 23290934  | Her |     |
| 8 | 23619430  | 23619430  | Bro |     |
| 8 | 23789303  | 23789303  | Bro |     |
| 8 | 23984036  | 23984036  | Nor |     |
| 8 | 24618142  | 24618142  | Hol |     |
| 8 | 25261181  | 25261181  | Jer |     |
| 8 | 26718343  | 26718343  | Hol |     |
| 8 | 28079584  | 28079584  | Nor |     |
| 8 | 28471805  | 28471805  | Bro |     |
| 8 | 28687578  | 28872401  |     | Guz |

|   |          |          |    |     |     |
|---|----------|----------|----|-----|-----|
| 8 | 28687578 | 28872401 |    |     | Nel |
| 8 | 28763870 | 28763870 |    | Gue |     |
| 8 | 28825152 | 28825152 |    | Her |     |
| 8 | 29449439 | 29449439 |    | Ang |     |
| 8 | 29647443 | 29647443 |    | Ang |     |
| 8 | 29838160 | 30090854 |    |     | Gir |
| 8 | 29922096 | 29922096 |    | Bro |     |
| 8 | 30025994 | 30090854 |    |     | Nel |
| 8 | 30443348 | 30443348 |    | Ang |     |
| 8 | 30628097 | 30842868 |    |     | Guz |
| 8 | 30644755 | 30644755 |    | Gue |     |
| 8 | 30715351 | 30715351 |    | Bro |     |
| 8 | 30799143 | 30799143 |    | Gue |     |
| 8 | 30799143 | 30799143 |    | Her |     |
| 8 | 32085661 | 32085661 |    | Hol |     |
| 8 | 34583250 | 34583250 |    | Gue |     |
| 8 | 36477188 | 36477188 |    | Her |     |
| 8 | 37222756 | 37222756 |    | Nor |     |
| 8 | 37342100 | 37342100 |    | Ang |     |
| 8 | 37388481 | 37388481 |    | Bro |     |
| 8 | 37822309 | 37822309 |    | Bro |     |
| 8 | 38070407 | 38070407 |    | Ang |     |
| 8 | 39188107 | 39188107 |    | Lim |     |
| 8 | 39288115 | 39689110 | ZT |     |     |
| 8 | 39800492 | 39800492 | ZT |     |     |
| 8 | 40111441 | 40111441 |    | Jer |     |
| 8 | 40570499 | 40570499 |    | Bro |     |
| 8 | 40858649 | 40858649 |    | Lim |     |
| 8 | 41089930 | 41089930 |    | Jer |     |
| 8 | 41960719 | 41960719 |    | Jer |     |
| 8 | 42033636 | 42033636 |    | Bro |     |
| 8 | 42126519 | 42126519 |    | Ang |     |
| 8 | 42126519 | 42126519 |    | Hol |     |
| 8 | 42228790 | 42228790 |    | Hol |     |
| 8 | 43102448 | 43102448 |    | Her |     |
| 8 | 45755851 | 45755851 |    | Lim |     |
| 8 | 45838096 | 45838096 |    | Bro |     |
| 8 | 45903217 | 45903217 |    | Her |     |
| 8 | 45903217 | 45903217 |    | Jer |     |
| 8 | 46097338 | 46097338 |    | Hol |     |
| 8 | 46097338 | 46097338 |    | Jer |     |
| 8 | 47036986 | 47036986 |    | Jer |     |
| 8 | 47195421 | 47195421 |    | Nor |     |
| 8 | 48646578 | 48646578 |    | Hol |     |
| 8 | 48744904 | 48809204 |    | Bro |     |
| 8 | 51243026 | 51243026 |    | Bro |     |
| 8 | 52638344 | 52638344 |    | Jer |     |
| 8 | 52999092 | 52999092 |    | Her |     |



|   |          |          |    |     |     |
|---|----------|----------|----|-----|-----|
| 8 | 53490845 | 54592381 | ZT |     |     |
| 8 | 53840928 | 53840928 |    | Nor |     |
| 8 | 55586698 | 55586698 |    | Nor |     |
| 8 | 57499577 | 57499577 |    | Nor |     |
| 8 | 57743546 | 57743546 |    | Her |     |
| 8 | 58401933 | 58469030 |    |     | Nel |
| 8 | 58649674 | 58727004 | ZT |     |     |
| 8 | 58852794 | 58852794 |    | Hol |     |
| 8 | 60586901 | 60634349 |    |     | Nel |
| 8 | 61012058 | 61012058 |    | Ang |     |
| 8 | 61543379 | 62082735 | ZT |     |     |
| 8 | 62223829 | 62874750 | ZT |     |     |
| 8 | 63144428 | 63144428 |    | Gue |     |
| 8 | 63563140 | 63661095 |    | Gue |     |
| 8 | 63934537 | 63934537 |    | Hol |     |
| 8 | 64077413 | 64077413 |    | Hol |     |
| 8 | 66171277 | 66171277 |    | Jer |     |
| 8 | 66593971 | 66593971 |    | Jer |     |
| 8 | 66757742 | 66990971 |    |     | Guz |
| 8 | 67156577 | 67156577 |    | Ang |     |
| 8 | 68238670 | 68238670 |    | Ang |     |
| 8 | 68238670 | 68238670 |    | Nor |     |
| 8 | 68915433 | 68915433 |    | Nor |     |
| 8 | 69691214 | 70488061 | ZT |     |     |
| 8 | 70228036 | 70228036 |    | Ang |     |
| 8 | 70344673 | 70344673 |    | Her |     |
| 8 | 70801131 | 70801131 |    | Bro |     |
| 8 | 71503728 | 71503728 |    | Jer |     |
| 8 | 71985952 | 71985952 |    | Gue |     |
| 8 | 72460748 | 72460748 |    | Lim |     |
| 8 | 73230618 | 73230618 |    | Jer |     |
| 8 | 73552298 | 73552298 |    | Jer |     |
| 8 | 73617355 | 73704634 | ZT |     |     |
| 8 | 75100951 | 75171282 |    |     | Nel |
| 8 | 75889454 | 76670107 |    |     | Nel |
| 8 | 76319321 | 76319321 |    | Her |     |
| 8 | 76797897 | 76833951 |    |     | Nel |
| 8 | 77319956 | 77319956 |    | Gue |     |
| 8 | 77646612 | 77646612 |    | Nor |     |
| 8 | 77917690 | 77917690 |    | Ang |     |
| 8 | 79269699 | 79269699 |    | Hol |     |
| 8 | 82371836 | 82371836 |    | Jer |     |
| 8 | 83705825 | 83705825 |    | Bro |     |
| 8 | 84132219 | 84132219 |    | Lim |     |
| 8 | 85657033 | 85657033 |    | Bro |     |
| 8 | 88419753 | 88419753 |    | Jer |     |
| 8 | 88894493 | 88894493 |    | Ang |     |
| 8 | 90107228 | 90107228 |    | Gue |     |

|   |           |           |     |
|---|-----------|-----------|-----|
| 8 | 92009341  | 92009341  | Hol |
| 8 | 92797782  | 92797782  | Ang |
| 8 | 92797782  | 92797782  | Jer |
| 8 | 93263312  | 93263312  | Gue |
| 8 | 93363018  | 93363018  | Ang |
| 8 | 93576985  | 93576985  | Her |
| 8 | 93832928  | 93832928  | Bro |
| 8 | 94893598  | 94893598  | Bro |
| 8 | 95194896  | 95194896  | Her |
| 8 | 95301329  | 95301329  | Lim |
| 8 | 95713968  | 95713968  | Ang |
| 8 | 95829528  | 95829528  | Hol |
| 8 | 96069029  | 96069029  | Nor |
| 8 | 96128989  | 96128989  | Her |
| 8 | 96292160  | 96292160  | Bro |
| 8 | 97981732  | 97981732  | Gue |
| 8 | 98888929  | 98888929  | Her |
| 8 | 99591497  | 99591497  | Nor |
| 8 | 100184842 | 100184842 | Her |
| 8 | 101627593 | 101627593 | Hol |
| 8 | 103695388 | 103695388 | Jer |
| 8 | 104111627 | 104111627 | Jer |
| 8 | 104425148 | 104425148 | Bro |
| 8 | 104507052 | 104507052 | Jer |
| 8 | 104994753 | 104994753 | Nor |
| 8 | 106029979 | 106029979 | Nor |
| 8 | 106172780 | 106172780 | Ang |
| 8 | 108048851 | 108048851 | Bro |
| 8 | 108128729 | 108128729 | Hol |
| 8 | 109067870 | 109067870 | Lim |
| 8 | 109882809 | 109882809 | Ang |
| 9 | 690802    | 690802    | Lim |
| 9 | 3684547   | 3684547   | Hol |
| 9 | 3796382   | 3796382   | Bro |
| 9 | 3796382   | 4191092   | Cha |
| 9 | 4007054   | 4007054   | Bro |
| 9 | 4129332   | 4129332   | Hol |
| 9 | 4305338   | 4362391   | Cha |
| 9 | 4305338   | 4305338   | Lim |
| 9 | 4873335   | 4873335   | Jer |
| 9 | 5176318   | 5176318   | Gue |
| 9 | 5228930   | 5228930   | Nor |
| 9 | 5772412   | 5772412   | Ang |
| 9 | 6535846   | 6535846   | Hol |
| 9 | 6700692   | 6700692   | Jer |
| 9 | 7200551   | 7200551   | Bro |
| 9 | 7985903   | 7985903   | Gue |
| 9 | 8012538   | 8012538   | Jer |

|   |          |          |     |     |
|---|----------|----------|-----|-----|
| 9 | 8640019  | 8640019  | Bro |     |
| 9 | 8842006  | 8842006  | Gue |     |
| 9 | 9402427  | 9402427  | Nor |     |
| 9 | 11124315 | 11124315 | Jer |     |
| 9 | 11337983 | 11337983 | Hol |     |
| 9 | 12070981 | 12070981 | Gue |     |
| 9 | 12226204 | 12226204 | Nor |     |
| 9 | 12599151 | 12599151 | Bro |     |
| 9 | 13303881 | 13303881 | Nor |     |
| 9 | 15193951 | 15193951 | Bro |     |
| 9 | 15893918 | 15893918 | Lim |     |
| 9 | 16416954 | 16416954 | Bro |     |
| 9 | 17425045 | 17425045 | Bro |     |
| 9 | 17425045 | 17425045 | Gue |     |
| 9 | 18700553 | 18700553 | Lim |     |
| 9 | 19074860 | 19074860 | Lim |     |
| 9 | 19407892 | 19407892 | Lim |     |
| 9 | 19638679 | 19638679 | Ang |     |
| 9 | 19816668 | 19816668 | Lim |     |
| 9 | 20123664 | 20123664 | Her |     |
| 9 | 20123664 | 20123664 | Jer |     |
| 9 | 20563228 | 20563228 | Lim |     |
| 9 | 21663298 | 21663298 | Ang |     |
| 9 | 22358470 | 22358470 | Nor |     |
| 9 | 22638267 | 22638267 | Her |     |
| 9 | 23170155 | 23170155 | Hol |     |
| 9 | 23221513 | 23221513 | Gue |     |
| 9 | 23307499 | 23307499 | Lim |     |
| 9 | 23371579 | 23371579 | Bro |     |
| 9 | 23482919 | 23482919 | Bro |     |
| 9 | 23482919 | 23482919 | Hol |     |
| 9 | 23751786 | 23964598 |     | Guz |
| 9 | 24015001 | 24015001 | Ang |     |
| 9 | 24120158 | 24120158 | Lim |     |
| 9 | 24707581 | 24707581 | Her |     |
| 9 | 25387468 | 25387468 | Hol |     |
| 9 | 25770398 | 25964541 |     | Guz |
| 9 | 26459366 | 26459366 | Nor |     |
| 9 | 28195699 | 28195699 | Ang |     |
| 9 | 28195699 | 28195699 | Gue |     |
| 9 | 28195699 | 28195699 | Hol |     |
| 9 | 28302578 | 28302578 | Jer |     |
| 9 | 29502871 | 29502871 | Her |     |
| 9 | 30620057 | 30620057 | Jer |     |
| 9 | 31028182 | 31028182 | Jer |     |
| 9 | 32346476 | 32346476 | Bro |     |
| 9 | 32827869 | 32827869 | Jer |     |
| 9 | 33744291 | 33744291 | Her |     |

|   |          |          |     |     |
|---|----------|----------|-----|-----|
| 9 | 35602819 | 35602819 | Bro |     |
| 9 | 36285976 | 36285976 | Gue |     |
| 9 | 36285976 | 36285976 | Nor |     |
| 9 | 36315157 | 36315157 | Lim |     |
| 9 | 36962229 | 37067407 |     | Gir |
| 9 | 38196189 | 38196189 | Her |     |
| 9 | 38251741 | 38251741 | Gue |     |
| 9 | 40082884 | 40287003 |     | Guz |
| 9 | 40389526 | 40389526 | Lim |     |
| 9 | 40400556 | 40676359 |     | Guz |
| 9 | 40524828 | 40691358 | Cha |     |
| 9 | 40845265 | 40845265 | Gue |     |
| 9 | 40845265 | 40845265 | Nor |     |
| 9 | 41873404 | 41873404 | Gue |     |
| 9 | 42056117 | 42056117 | Her |     |
| 9 | 42231014 | 42231014 | Jer |     |
| 9 | 42308530 | 42866215 |     | Gir |
| 9 | 42506424 | 42556097 | Lim |     |
| 9 | 42800959 | 42800959 | Ang |     |
| 9 | 42800959 | 42800959 | Hol |     |
| 9 | 42852058 | 42852058 | Lim |     |
| 9 | 42930839 | 43296117 | Cha |     |
| 9 | 43296117 | 43296117 | Bro |     |
| 9 | 45545519 | 45767377 | Cha |     |
| 9 | 46118697 | 46118697 | Her |     |
| 9 | 46160692 | 46160692 | Ang |     |
| 9 | 46910116 | 47250608 | Cha |     |
| 9 | 47150686 | 47150686 | Jer |     |
| 9 | 47354617 | 47354617 | Ang |     |
| 9 | 47354617 | 47503904 | Cha |     |
| 9 | 47392224 | 47392224 | Gue |     |
| 9 | 47429976 | 47429976 | Jer |     |
| 9 | 47882445 | 47882445 | Gue |     |
| 9 | 48191836 | 48191836 | Jer |     |
| 9 | 48233084 | 48233084 | Lim |     |
| 9 | 49006798 | 49006798 | Lim |     |
| 9 | 49010680 | 49326280 |     | Guz |
| 9 | 49382213 | 49382213 | Bro |     |
| 9 | 49573660 | 49573660 | Lim |     |
| 9 | 49800695 | 50235638 |     | Gir |
| 9 | 50225398 | 50225398 | Nor |     |
| 9 | 50366177 | 50366177 | Jer |     |
| 9 | 51165951 | 51165951 | Her |     |
| 9 | 51617221 | 51617221 | Lim |     |
| 9 | 51790511 | 51790511 | Her |     |
| 9 | 52509936 | 52587905 | Hol |     |
| 9 | 52556989 | 52873430 |     | Nel |
| 9 | 52587905 | 52587905 | Ang |     |

|   |          |          |     |
|---|----------|----------|-----|
| 9 | 52587905 | 52587905 | Jer |
| 9 | 52743323 | 52743323 | Hol |
| 9 | 53324392 | 53324392 | Gue |
| 9 | 55813477 | 55813477 | Nor |
| 9 | 55944849 | 55944849 | Bro |
| 9 | 60114332 | 60114332 | Hol |
| 9 | 60283742 | 60283742 | Nor |
| 9 | 61397847 | 61397847 | Nor |
| 9 | 61617079 | 61617079 | Jer |
| 9 | 61937112 | 61937112 | Bro |
| 9 | 62922027 | 62922027 | Gue |
| 9 | 63825670 | 63825670 | Bro |
| 9 | 63928374 | 63928374 | Nor |
| 9 | 64331474 | 64331474 | Nor |
| 9 | 64381905 | 64381905 | Her |
| 9 | 64593605 | 64593605 | Ang |
| 9 | 65485634 | 65485634 | Hol |
| 9 | 66171529 | 66171529 | Nor |
| 9 | 66541767 | 66541767 | Lim |
| 9 | 67110583 | 67110583 | Lim |
| 9 | 67889925 | 67889925 | Lim |
| 9 | 68611689 | 68611689 | Bro |
| 9 | 68611689 | 68611689 | Gue |
| 9 | 68773418 | 68773418 | Jer |
| 9 | 71798963 | 71798963 | Lim |
| 9 | 71827103 | 71827103 | Bro |
| 9 | 71914087 | 71914087 | Gue |
| 9 | 72201716 | 72201716 | Hol |
| 9 | 72201716 | 72201716 | Jer |
| 9 | 72291005 | 72291005 | Gue |
| 9 | 72985658 | 72985658 | Bro |
| 9 | 74410911 | 74410911 | Jer |
| 9 | 75595971 | 75595971 | Ang |
| 9 | 76188149 | 76188149 | Lim |
| 9 | 76534576 | 76534576 | Gue |
| 9 | 77760067 | 77760067 | Her |
| 9 | 78774222 | 78774222 | Lim |
| 9 | 79916244 | 79916244 | Bro |
| 9 | 80194380 | 80194380 | Lim |
| 9 | 80921402 | 80998297 | Hol |
| 9 | 81312423 | 81312423 | Hol |
| 9 | 81399462 | 81399462 | Bro |
| 9 | 81523056 | 81600085 | Gue |
| 9 | 81710664 | 81710664 | Lim |
| 9 | 81964703 | 81964703 | Hol |
| 9 | 81964703 | 81964703 | Nor |
| 9 | 82495072 | 82495072 | Hol |
| 9 | 83837068 | 83837068 | Hol |

|    |           |           |     |
|----|-----------|-----------|-----|
| 9  | 84489855  | 84489855  | Nor |
| 9  | 85536454  | 85536454  | Lim |
| 9  | 85987860  | 85987860  | Ang |
| 9  | 86343243  | 86343243  | Nor |
| 9  | 86546451  | 86546451  | Jer |
| 9  | 86588370  | 86588370  | Lim |
| 9  | 86902322  | 86902322  | Bro |
| 9  | 87186800  | 87186800  | Her |
| 9  | 87542864  | 87542864  | Ang |
| 9  | 87855163  | 87855163  | Jer |
| 9  | 88033710  | 88033710  | Hol |
| 9  | 88366032  | 88366032  | Ang |
| 9  | 88366032  | 88366032  | Her |
| 9  | 88385591  | 88385591  | Bro |
| 9  | 88502597  | 88502597  | Nor |
| 9  | 90247980  | 90247980  | Gue |
| 9  | 90410552  | 90410552  | Jer |
| 9  | 90690991  | 90690991  | Nor |
| 9  | 91717629  | 91717629  | Hol |
| 9  | 93880473  | 93880473  | Bro |
| 9  | 96021779  | 96021779  | Ang |
| 9  | 96673261  | 96673261  | Hol |
| 9  | 96704827  | 96704827  | Nor |
| 9  | 97459242  | 97459242  | Nor |
| 9  | 97584669  | 97584669  | Ang |
| 9  | 98130070  | 98130070  | Nor |
| 9  | 99073790  | 99073790  | Her |
| 9  | 99931149  | 99931149  | Nor |
| 9  | 100382402 | 100382402 | Her |
| 9  | 100625191 | 100625191 | Lim |
| 9  | 101083060 | 101083060 | Lim |
| 9  | 101436616 | 101436616 | Lim |
| 9  | 101530740 | 101530740 | Nor |
| 9  | 101751589 | 101751589 | Her |
| 9  | 101824431 | 101824431 | Hol |
| 9  | 102443593 | 102443593 | Hol |
| 9  | 102573146 | 102573146 | Ang |
| 9  | 102573146 | 102573146 | Nor |
| 9  | 102838428 | 102838428 | Lim |
| 9  | 104154509 | 104154509 | Nor |
| 9  | 105649672 | 105649672 | Her |
| 10 | 134749    | 134749    | Gue |
| 10 | 134749    | 134749    | Jer |
| 10 | 2228385   | 2228385   | Gue |
| 10 | 2311581   | 2311581   | Ang |
| 10 | 2504463   | 2504463   | Jer |
| 10 | 2637641   | 2637641   | Bro |
| 10 | 2924279   | 2924279   | Hol |

|    |          |          |     |     |
|----|----------|----------|-----|-----|
| 10 | 3141092  | 3141092  | Her |     |
| 10 | 3585430  | 3585430  | Her |     |
| 10 | 3929654  | 3929654  | Nor |     |
| 10 | 4469925  | 4469925  | Ang |     |
| 10 | 5715632  | 5877794  |     | Guz |
| 10 | 6278469  | 6278469  | Lim |     |
| 10 | 6403269  | 6403269  | Bro |     |
| 10 | 6451551  | 6451551  | Hol |     |
| 10 | 7261838  | 7261838  | Bro |     |
| 10 | 7261838  | 7369851  | Cha |     |
| 10 | 7392379  | 7392379  | Hol |     |
| 10 | 7430222  | 7430222  | Gue |     |
| 10 | 7835791  | 7835791  | Gue |     |
| 10 | 8069320  | 8069320  | Lim |     |
| 10 | 8329810  | 8329810  | Her |     |
| 10 | 8395912  | 8494503  | Lim |     |
| 10 | 8643228  | 8643228  | Gue |     |
| 10 | 9363492  | 9456921  | Cha |     |
| 10 | 11407194 | 11407194 | Bro |     |
| 10 | 11998905 | 11998905 | Her |     |
| 10 | 12216332 | 12216332 | Jer |     |
| 10 | 12731297 | 12731297 | Lim |     |
| 10 | 12883315 | 12883315 | Hol |     |
| 10 | 12919154 | 12919154 | Ang |     |
| 10 | 14605227 | 14605227 | Ang |     |
| 10 | 15226746 | 15226746 | Nor |     |
| 10 | 15437548 | 15437548 | Gue |     |
| 10 | 15535737 | 15535737 | Hol |     |
| 10 | 15756752 | 15756752 | Ang |     |
| 10 | 15994229 | 15994229 | Her |     |
| 10 | 16583007 | 16583007 | Ang |     |
| 10 | 17127861 | 17127861 | Bro |     |
| 10 | 17173220 | 17173220 | Jer |     |
| 10 | 17544378 | 17544378 | Bro |     |
| 10 | 18035832 | 18035832 | Bro |     |
| 10 | 21871198 | 21871198 | Gue |     |
| 10 | 22212977 | 22212977 | Nor |     |
| 10 | 25629283 | 25629283 | Ang |     |
| 10 | 26500270 | 26500270 | Jer |     |
| 10 | 27125997 | 27125997 | Ang |     |
| 10 | 27431672 | 27431672 | Lim |     |
| 10 | 27711498 | 27711498 | Bro |     |
| 10 | 29252807 | 29252807 | Ang |     |
| 10 | 29282049 | 29282049 | Gue |     |
| 10 | 29324665 | 29324665 | Jer |     |
| 10 | 29398414 | 29398414 | Ang |     |
| 10 | 29789876 | 29789876 | Her |     |
| 10 | 31330749 | 31330749 | Ang |     |

|    |          |          |    |     |
|----|----------|----------|----|-----|
| 10 | 31503971 | 31503971 |    | Ang |
| 10 | 34505253 | 34505253 |    | Hol |
| 10 | 34708307 | 34708307 |    | Bro |
| 10 | 35275282 | 35275282 |    | Her |
| 10 | 36488829 | 37051537 | ZT |     |
| 10 | 36751951 | 36751951 |    | Her |
| 10 | 37810802 | 37810802 |    | Nor |
| 10 | 38030548 | 38030548 |    | Hol |
| 10 | 38262598 | 38262598 |    | Bro |
| 10 | 41051430 | 41051430 |    | Bro |
| 10 | 41727808 | 41727808 |    | Hol |
| 10 | 44105865 | 44198451 |    | Nor |
| 10 | 44825282 | 44825282 |    | Jer |
| 10 | 47429340 | 47429340 |    | Her |
| 10 | 47928667 | 47928667 |    | Gue |
| 10 | 48058379 | 48058379 |    | Her |
| 10 | 48558673 | 48558673 |    | Ang |
| 10 | 48590596 | 48590596 |    | Her |
| 10 | 48675935 | 48675935 |    | Lim |
| 10 | 51377461 | 51377461 |    | Ang |
| 10 | 51807323 | 51807323 |    | Her |
| 10 | 53903255 | 53903255 |    | Gue |
| 10 | 54925134 | 54925134 |    | Bro |
| 10 | 54994071 | 54994071 |    | Her |
| 10 | 55311677 | 55311677 |    | Nor |
| 10 | 56304161 | 56304161 |    | Lim |
| 10 | 56397326 | 56397326 |    | Gue |
| 10 | 56443444 | 56443444 |    | Lim |
| 10 | 56538370 | 56538370 |    | Nor |
| 10 | 57588822 | 57588822 |    | Nor |
| 10 | 57691818 | 57691818 |    | Lim |
| 10 | 58121753 | 58121753 |    | Bro |
| 10 | 59615280 | 59615280 |    | Lim |
| 10 | 59927870 | 59927870 |    | Gue |
| 10 | 60321912 | 60321912 |    | Her |
| 10 | 60381852 | 60446128 |    | Nel |
| 10 | 60512444 | 60512444 |    | Her |
| 10 | 60554234 | 60621528 |    | Nel |
| 10 | 62795166 | 62795166 |    | Lim |
| 10 | 63025239 | 63025239 |    | Lim |
| 10 | 63187437 | 63187437 |    | Her |
| 10 | 63498887 | 63498887 |    | Ang |
| 10 | 63498887 | 63498887 |    | Gue |
| 10 | 63498887 | 63498887 |    | Hol |
| 10 | 63953496 | 63953496 |    | Gue |
| 10 | 65388858 | 65388858 |    | Jer |
| 10 | 65923499 | 65923499 |    | Lim |
| 10 | 66121449 | 66121449 |    | Jer |



|    |          |          |     |
|----|----------|----------|-----|
| 10 | 66704624 | 66704624 | Nor |
| 10 | 68880888 | 68880888 | Ang |
| 10 | 69352412 | 69352412 | Gue |
| 10 | 69508613 | 69508613 | Hol |
| 10 | 69988910 | 69988910 | Bro |
| 10 | 70142738 | 70142738 | Gue |
| 10 | 70231445 | 70231445 | Ang |
| 10 | 70756526 | 70756526 | Her |
| 10 | 70756526 | 70756526 | Hol |
| 10 | 71421255 | 71421255 | Bro |
| 10 | 71770156 | 71770156 | Ang |
| 10 | 72809829 | 72809829 | Nor |
| 10 | 73755051 | 73755051 | Bro |
| 10 | 75007019 | 75007019 | Bro |
| 10 | 75306249 | 75306249 | Nor |
| 10 | 75509429 | 75509429 | Lim |
| 10 | 75844063 | 75844063 | Nor |
| 10 | 76057864 | 76057864 | Hol |
| 10 | 76624088 | 76624088 | Lim |
| 10 | 76777629 | 76777629 | Her |
| 10 | 76832220 | 76832220 | Lim |
| 10 | 77332937 | 77332937 | Hol |
| 10 | 77332937 | 77332937 | Jer |
| 10 | 77532253 | 77532253 | Nor |
| 10 | 77788502 | 77788502 | Hol |
| 10 | 78516979 | 78516979 | Nor |
| 10 | 82904079 | 82904079 | Gue |
| 10 | 83271286 | 83271286 | Jer |
| 10 | 84447428 | 84447428 | Ang |
| 10 | 85008546 | 85008546 | Ang |
| 10 | 85008546 | 85008546 | Nor |
| 10 | 86272394 | 86272394 | Her |
| 10 | 87794200 | 87794200 | Her |
| 10 | 88130360 | 88130360 | Ang |
| 10 | 88130360 | 88130360 | Gue |
| 10 | 88130360 | 88130360 | Nor |
| 10 | 88834174 | 88834174 | Hol |
| 10 | 89023133 | 89023133 | Ang |
| 10 | 89023133 | 89023133 | Nor |
| 10 | 89434017 | 89434017 | Nor |
| 10 | 89782984 | 90050733 |     |
| 10 | 89945955 | 89945955 | Her |
| 10 | 91970455 | 91970455 | Hol |
| 10 | 92073773 | 92073773 | Ang |
| 10 | 92602520 | 92602520 | Jer |
| 10 | 92653880 | 92653880 | Hol |
| 10 | 92790932 | 92790932 | Jer |
| 10 | 93346551 | 93346551 | Jer |

Gir

|    |           |           |     |     |
|----|-----------|-----------|-----|-----|
| 10 | 93509401  | 93509401  | Ang |     |
| 10 | 93509401  | 93509401  | Jer |     |
| 10 | 94715950  | 94715950  | Gue |     |
| 10 | 96103382  | 96103382  | Bro |     |
| 10 | 96388351  | 96388351  | Ang |     |
| 10 | 97377127  | 97377127  | Nor |     |
| 10 | 97649823  | 97649823  | Ang |     |
| 10 | 98623937  | 98623937  | Hol |     |
| 10 | 99308679  | 99308679  | Ang |     |
| 10 | 99944011  | 99944011  | Gue |     |
| 10 | 100228887 | 100228887 | Her |     |
| 10 | 100270341 | 100270341 | Ang |     |
| 10 | 100534627 | 100534627 | Ang |     |
| 10 | 100770781 | 100770781 | Gue |     |
| 10 | 101028982 | 101028982 | Hol |     |
| 10 | 104145811 | 104145811 | Ang |     |
| 11 | 393478    | 393478    | Jer |     |
| 11 | 616630    | 616630    | Jer |     |
| 11 | 663516    | 663516    | Gue |     |
| 11 | 1412348   | 1412348   | Her |     |
| 11 | 2041610   | 2041610   | Ang |     |
| 11 | 3722186   | 3722186   | Lim |     |
| 11 | 4415832   | 4415832   | Hol |     |
| 11 | 4456531   | 4456531   | Jer |     |
| 11 | 6006940   | 6006940   | Nor |     |
| 11 | 6731396   | 6731396   | Nor |     |
| 11 | 7107211   | 7107211   | Jer |     |
| 11 | 7274240   | 7274240   | Jer |     |
| 11 | 8518930   | 8518930   | Gue |     |
| 11 | 9144119   | 9144119   | Ang |     |
| 11 | 9475973   | 9475973   | Hol |     |
| 11 | 9676196   | 9676196   | Her |     |
| 11 | 10002642  | 10002642  | Her |     |
| 11 | 10739491  | 10739491  | Gue |     |
| 11 | 11532236  | 11620540  |     | Guz |
| 11 | 11532236  | 11620540  |     | Nel |
| 11 | 11540044  | 11540044  | Bro |     |
| 11 | 11744765  | 11744765  |     | Guz |
| 11 | 11744765  | 11744765  |     | Nel |
| 11 | 11846607  | 11846607  |     | Guz |
| 11 | 11846607  | 11846607  |     | Nel |
| 11 | 11955169  | 12535496  |     | Guz |
| 11 | 11955169  | 12494220  |     | Nel |
| 11 | 12428643  | 12428643  | Gue |     |
| 11 | 12587425  | 12587425  | Ang |     |
| 11 | 13320143  | 13320143  | Nor |     |
| 11 | 14522171  | 14675391  |     | Guz |
| 11 | 14558180  | 14558180  | Her |     |

|    |          |          |     |     |
|----|----------|----------|-----|-----|
| 11 | 14587676 | 14675391 |     | Nel |
| 11 | 14778206 | 14982921 |     | Guz |
| 11 | 14778206 | 14982921 |     | Nel |
| 11 | 15084889 | 15412373 |     | Guz |
| 11 | 15084889 | 15084889 |     | Nel |
| 11 | 15363009 | 15363009 |     | Nel |
| 11 | 16865585 | 16865585 | Jer |     |
| 11 | 17062464 | 17062464 | Jer |     |
| 11 | 17640346 | 17640346 | Ang |     |
| 11 | 17956431 | 17956431 | Her |     |
| 11 | 18512028 | 18512028 | Nor |     |
| 11 | 18781213 | 18781213 | Her |     |
| 11 | 19598379 | 19598379 | Ang |     |
| 11 | 19760018 | 19760018 | Gue |     |
| 11 | 20509501 | 20509501 | Nor |     |
| 11 | 21094431 | 21094431 | Ang |     |
| 11 | 21094431 | 21094431 | Hol |     |
| 11 | 21999151 | 21999151 | Jer |     |
| 11 | 22949943 | 22949943 | Her |     |
| 11 | 24356707 | 24356707 | Nor |     |
| 11 | 24843332 | 24843332 | Lim |     |
| 11 | 24919445 | 24919445 | Jer |     |
| 11 | 25270871 | 25270871 | Gue |     |
| 11 | 25411625 | 25411625 | Jer |     |
| 11 | 25440847 | 25440847 | Her |     |
| 11 | 27583789 | 27583789 | Ang |     |
| 11 | 28506262 | 28506262 | Jer |     |
| 11 | 29200605 | 29200605 | Her |     |
| 11 | 29208446 | 29241578 |     | Nel |
| 11 | 29374448 | 29558210 |     | Nel |
| 11 | 29736085 | 29736085 | Jer |     |
| 11 | 29806067 | 29806067 | Gue |     |
| 11 | 29806067 | 29806067 | Nor |     |
| 11 | 30092731 | 30151802 | Jer |     |
| 11 | 31447557 | 31447557 | Ang |     |
| 11 | 31468196 | 31468196 | Bro |     |
| 11 | 32790675 | 32790675 | Bro |     |
| 11 | 33896920 | 33896920 | Jer |     |
| 11 | 34722810 | 34722810 | Her |     |
| 11 | 38431802 | 38431802 | Ang |     |
| 11 | 38901068 | 38901068 | Nor |     |
| 11 | 39110389 | 39110389 | Jer |     |
| 11 | 41315430 | 41315430 | Ang |     |
| 11 | 41523105 | 41523105 | Lim |     |
| 11 | 41976332 | 41976332 | Nor |     |
| 11 | 42029737 | 42029737 | Hol |     |
| 11 | 42029737 | 42029737 | Jer |     |
| 11 | 43038137 | 43038137 | Lim |     |

|    |          |          |     |
|----|----------|----------|-----|
| 11 | 43359807 | 43359807 | Ang |
| 11 | 43468467 | 43468467 | Bro |
| 11 | 43755155 | 43755155 | Jer |
| 11 | 44623029 | 44623029 | Gue |
| 11 | 45048973 | 45048973 | Lim |
| 11 | 45621258 | 45621258 | Nor |
| 11 | 45870048 | 45870048 | Her |
| 11 | 46194079 | 46194079 | Her |
| 11 | 46400199 | 46400199 | Hol |
| 11 | 48182216 | 48182216 | Ang |
| 11 | 50592011 | 50592011 | Ang |
| 11 | 50959186 | 50959186 | Lim |
| 11 | 51769143 | 51769143 | Jer |
| 11 | 52015128 | 52015128 | Jer |
| 11 | 52015128 | 52015128 | Lim |
| 11 | 52908086 | 53532817 | Cha |
| 11 | 53473259 | 53473259 | Lim |
| 11 | 53594492 | 53594492 | Her |
| 11 | 53996368 | 53996368 | Gue |
| 11 | 56158676 | 56158676 | Hol |
| 11 | 57077011 | 57077011 | Nor |
| 11 | 57444061 | 57444061 | Bro |
| 11 | 58316028 | 58316028 | Ang |
| 11 | 60423060 | 60423060 | Bro |
| 11 | 60744028 | 60744028 | Bro |
| 11 | 60913659 | 60993402 | Cha |
| 11 | 61144194 | 61144194 | Hol |
| 11 | 61950840 | 62507424 | Cha |
| 11 | 61989432 | 61989432 | Lim |
| 11 | 62107505 | 62107505 | Nor |
| 11 | 62260556 | 62260556 | Gue |
| 11 | 62566339 | 62566339 | Ang |
| 11 | 62566339 | 62566339 | Hol |
| 11 | 63482013 | 63482013 | Jer |
| 11 | 63888104 | 63888104 | Jer |
| 11 | 64098029 | 64098029 | Lim |
| 11 | 64159759 | 64159759 | Hol |
| 11 | 64229665 | 64229665 | Ang |
| 11 | 65139772 | 65139772 | Nor |
| 11 | 65444332 | 65444332 | Bro |
| 11 | 66789796 | 66872690 |     |
| 11 | 66895046 | 66895046 | Gue |
| 11 | 66930525 | 66930525 | Hol |
| 11 | 67637286 | 67637286 | Her |
| 11 | 68585171 | 68585171 | Bro |
| 11 | 68616008 | 68616008 | Lim |
| 11 | 68882864 | 68882864 | Ang |
| 11 | 69072869 | 69072869 | Hol |

Nel

|    |          |          |     |     |
|----|----------|----------|-----|-----|
| 11 | 69209744 | 69209744 | Lim |     |
| 11 | 69565598 | 69565598 | Lim |     |
| 11 | 69964661 | 69964661 | Hol |     |
| 11 | 70073456 | 70073456 |     | Guz |
| 11 | 70133736 | 70133736 | Her |     |
| 11 | 70260677 | 70351671 | Cha |     |
| 11 | 70422723 | 70422723 | Lim |     |
| 11 | 70547699 | 70547699 | Nor |     |
| 11 | 70974393 | 70974393 | Ang |     |
| 11 | 71110237 | 71110237 | Gue |     |
| 11 | 71764022 | 71764022 | Nor |     |
| 11 | 71857568 | 71857568 | Ang |     |
| 11 | 72654390 | 72802766 | Cha |     |
| 11 | 72822024 | 72822024 | Bro |     |
| 11 | 73023355 | 73073616 | Bro |     |
| 11 | 73023355 | 73588810 | Cha |     |
| 11 | 73191754 | 73191754 | Bro |     |
| 11 | 73191754 | 73191754 | Gue |     |
| 11 | 73407648 | 73407648 | Jer |     |
| 11 | 73453361 | 73453361 | Bro |     |
| 11 | 73520084 | 73520084 | Lim |     |
| 11 | 74083671 | 74083671 | Hol |     |
| 11 | 74215819 | 74215819 | Cha |     |
| 11 | 74215819 | 74215819 | Lim |     |
| 11 | 74350377 | 74599988 | Cha |     |
| 11 | 74541961 | 74541961 | Gue |     |
| 11 | 74731727 | 74793726 | Cha |     |
| 11 | 74924368 | 74924368 | Cha |     |
| 11 | 75037477 | 75387992 | Cha |     |
| 11 | 75088356 | 75088356 | Bro |     |
| 11 | 75324266 | 75324266 | Gue |     |
| 11 | 75896887 | 75896887 | Hol |     |
| 11 | 75972707 | 75972707 | Nor |     |
| 11 | 76679431 | 76679431 | Gue |     |
| 11 | 77488961 | 77488961 | Lim |     |
| 11 | 77719309 | 77719309 | Her |     |
| 11 | 78293151 | 78293151 | Lim |     |
| 11 | 78559406 | 78559406 | Hol |     |
| 11 | 79457949 | 79457949 | Ang |     |
| 11 | 80730546 | 80730546 | Her |     |
| 11 | 83210249 | 83210249 | Bro |     |
| 11 | 83426113 | 83426113 | Hol |     |
| 11 | 83702805 | 83702805 | Bro |     |
| 11 | 83866684 | 83866684 | Lim |     |
| 11 | 84229041 | 84229041 | Ang |     |
| 11 | 85789132 | 85789132 | Ang |     |
| 11 | 85997549 | 85997549 | Her |     |
| 11 | 86030202 | 86030202 | Ang |     |

|    |           |           |     |
|----|-----------|-----------|-----|
| 11 | 86685748  | 86685748  | Her |
| 11 | 86953667  | 86953667  | Bro |
| 11 | 87137735  | 87137735  | Bro |
| 11 | 88056164  | 88056164  | Bro |
| 11 | 88379504  | 88379504  | Jer |
| 11 | 89454963  | 89454963  | Gue |
| 11 | 90475740  | 90475740  | Jer |
| 11 | 92530892  | 92530892  | Gue |
| 11 | 94181367  | 94181367  | Jer |
| 11 | 94590620  | 94590620  | Hol |
| 11 | 94590620  | 94590620  | Nor |
| 11 | 95212298  | 95212298  | Ang |
| 11 | 95802430  | 95802430  | Hol |
| 11 | 97189737  | 97189737  | Bro |
| 11 | 99096532  | 99096532  | Lim |
| 11 | 99985406  | 99985406  | Lim |
| 11 | 100742447 | 100742447 | Ang |
| 11 | 101262682 | 101262682 | Gue |
| 11 | 101759879 | 101841579 | Gue |
| 11 | 102227232 | 102227232 | Nor |
| 11 | 102501787 | 102501787 | Nor |
| 11 | 102883420 | 102883420 | Bro |
| 11 | 103410170 | 103410170 | Jer |
| 11 | 104117370 | 104117370 | Bro |
| 11 | 106402446 | 106402446 | Ang |
| 11 | 106402446 | 106402446 | Jer |
| 12 | 2203849   | 2203849   | Her |
| 12 | 2411488   | 2411488   | Bro |
| 12 | 2610868   | 2610868   | Jer |
| 12 | 4026108   | 4026108   | Her |
| 12 | 4195607   | 4195607   | Gue |
| 12 | 4329618   | 4329618   | Her |
| 12 | 4807493   | 4807493   | Lim |
| 12 | 5074528   | 5074528   | Ang |
| 12 | 5717994   | 5717994   | Lim |
| 12 | 6880711   | 6880711   | Lim |
| 12 | 9047249   | 9047249   | Bro |
| 12 | 10384095  | 10384095  | Bro |
| 12 | 10566940  | 10566940  | Nor |
| 12 | 10640416  | 10640416  | Gue |
| 12 | 10858590  | 10858590  | Her |
| 12 | 12353385  | 12353385  | Bro |
| 12 | 12756105  | 12756105  | Nor |
| 12 | 13111153  | 13111153  | Jer |
| 12 | 14985891  | 14985891  | Her |
| 12 | 15637232  | 15637232  | Ang |
| 12 | 16030260  | 16030260  | Hol |
| 12 | 16187847  | 16187847  | Her |

|    |          |          |    |     |
|----|----------|----------|----|-----|
| 12 | 16790859 | 16790859 |    | Jer |
| 12 | 17044377 | 17044377 |    | Nor |
| 12 | 17407295 | 17407295 |    | Bro |
| 12 | 18003452 | 18003452 |    | Jer |
| 12 | 18106772 | 18106772 |    | Gue |
| 12 | 18132138 | 18132138 |    | Her |
| 12 | 19917196 | 19917196 |    | Bro |
| 12 | 20841058 | 20841058 |    | Her |
| 12 | 22840328 | 22840328 |    | Ang |
| 12 | 24151669 | 24151669 |    | Nor |
| 12 | 24776838 | 24776838 |    | Lim |
| 12 | 25448771 | 25448771 |    | Jer |
| 12 | 25941332 | 25941332 |    | Nor |
| 12 | 26891864 | 26891864 |    | Hol |
| 12 | 27114388 | 27114388 |    | Bro |
| 12 | 27344275 | 27344275 |    | Ang |
| 12 | 27935604 | 29508940 | ZT |     |
| 12 | 28137445 | 28137445 |    | Hol |
| 12 | 28514178 | 28514178 |    | Gue |
| 12 | 30766995 | 30766995 |    | Nor |
| 12 | 31157450 | 31157450 |    | Nor |
| 12 | 31787030 | 31787030 |    | Nor |
| 12 | 32438446 | 32438446 |    | Jer |
| 12 | 32596654 | 32596654 |    | Her |
| 12 | 33312158 | 33312158 |    | Ang |
| 12 | 34894964 | 34944506 |    | Lim |
| 12 | 35250806 | 35250806 |    | Nor |
| 12 | 37966212 | 37966212 |    | Nor |
| 12 | 38858520 | 38858520 |    | Nor |
| 12 | 42222361 | 42222361 |    | Bro |
| 12 | 42601919 | 42601919 |    | Her |
| 12 | 42601919 | 42601919 |    | Hol |
| 12 | 43242579 | 43242579 |    | Hol |
| 12 | 43242579 | 43242579 |    | Jer |
| 12 | 43575958 | 43575958 |    | Lim |
| 12 | 44120862 | 44120862 |    | Gue |
| 12 | 46269299 | 46269299 |    | Bro |
| 12 | 47603732 | 47603732 |    | Lim |
| 12 | 48557678 | 48557678 |    | Lim |
| 12 | 48587202 | 48587202 |    | Ang |
| 12 | 48831255 | 48831255 |    | Hol |
| 12 | 49756074 | 49756074 |    | Hol |
| 12 | 50223292 | 50223292 |    | Gue |
| 12 | 50813072 | 50813072 |    | Ang |
| 12 | 50859036 | 50859036 |    | Jer |
| 12 | 52147705 | 52147705 |    | Gue |
| 12 | 52647465 | 52647465 |    | Her |
| 12 | 53070951 | 53070951 |    | Bro |

|    |          |          |     |     |
|----|----------|----------|-----|-----|
| 12 | 53213890 | 53213890 | Her |     |
| 12 | 53777939 | 53777939 | Ang |     |
| 12 | 54241569 | 54241569 | Gue |     |
| 12 | 54754795 | 54754795 | Jer |     |
| 12 | 55414014 | 55414014 | Bro |     |
| 12 | 55903047 | 55903047 | Ang |     |
| 12 | 56419641 | 56419641 | Hol |     |
| 12 | 56782756 | 56782756 | Bro |     |
| 12 | 56938705 | 56938705 | Her |     |
| 12 | 58710498 | 58710498 | Ang |     |
| 12 | 58997484 | 58997484 | Ang |     |
| 12 | 61101274 | 61101274 | Gue |     |
| 12 | 61676514 | 61676514 | Jer |     |
| 12 | 62285245 | 62285245 | Lim |     |
| 12 | 62996126 | 62996126 | Hol |     |
| 12 | 63259793 | 63259793 | Ang |     |
| 12 | 66684733 | 66684733 | Hol |     |
| 12 | 67104828 | 67104828 | Ang |     |
| 12 | 68509420 | 68509420 | Jer |     |
| 12 | 68708862 | 68708862 | Lim |     |
| 12 | 69067361 | 69067361 | Her |     |
| 12 | 70116727 | 70116727 | Her |     |
| 12 | 78810215 | 78810215 | Nor |     |
| 12 | 79257925 | 79257925 | Her |     |
| 12 | 79377538 | 79377538 | Hol |     |
| 12 | 82625429 | 82625429 | Lim |     |
| 12 | 82849097 | 82849097 | Bro |     |
| 12 | 85076524 | 85076524 | Lim |     |
| 12 | 85134208 | 85134208 | Her |     |
| 12 | 85516869 | 85516869 | Lim |     |
| 12 | 85698140 | 85698140 | Ang |     |
| 12 | 85862176 | 85862176 | Lim |     |
| 12 | 86086671 | 86086671 | Lim |     |
| 12 | 86840773 | 86840773 | Lim |     |
| 12 | 87070903 | 87070903 | Nor |     |
| 12 | 87211312 | 87211312 | Gue |     |
| 12 | 89066393 | 89263967 |     | Guz |
| 12 | 89122653 | 89557545 |     | Gir |
| 12 | 89355616 | 89664275 | Cha |     |
| 12 | 89664275 | 89664275 | Lim |     |
| 12 | 90774139 | 90774139 | Her |     |
| 12 | 91048415 | 91048415 | Ang |     |
| 12 | 91091598 | 91091598 | Nor |     |
| 13 | 534257   | 534257   | Bro |     |
| 13 | 802694   | 802694   | Bro |     |
| 13 | 1393404  | 1393404  | Hol |     |
| 13 | 1676337  | 1676337  | Gue |     |
| 13 | 2954757  | 2954757  | Ang |     |



|    |          |          |     |     |
|----|----------|----------|-----|-----|
| 13 | 3919075  | 3919075  | Ang |     |
| 13 | 6343393  | 6343393  | Jer |     |
| 13 | 6402417  | 6402417  | Hol |     |
| 13 | 7605879  | 7605879  | Ang |     |
| 13 | 9229380  | 9229380  | Bro |     |
| 13 | 9374861  | 9374861  | Gue |     |
| 13 | 9585434  | 9585434  | Gue |     |
| 13 | 9764993  | 9764993  | Jer |     |
| 13 | 10356935 | 10356935 | Bro |     |
| 13 | 10564434 | 10564434 | Ang |     |
| 13 | 11630764 | 12073488 | Cha |     |
| 13 | 11763891 | 11794896 | Ang |     |
| 13 | 11862167 | 11862167 | Lim |     |
| 13 | 12017225 | 12017225 | Lim |     |
| 13 | 12626523 | 12626523 | Her |     |
| 13 | 13210821 | 13226766 | Cha |     |
| 13 | 14020222 | 14020222 | Her |     |
| 13 | 15665548 | 15665548 | Ang |     |
| 13 | 16298764 | 16298764 | Gue |     |
| 13 | 17335139 | 17335139 | Nor |     |
| 13 | 18905143 | 18905143 | Ang |     |
| 13 | 19547365 | 19547365 | Her |     |
| 13 | 19696845 | 19696845 | Nor |     |
| 13 | 20215298 | 20215298 | Ang |     |
| 13 | 21167068 | 21167068 | Jer |     |
| 13 | 21453849 | 21453849 | Hol |     |
| 13 | 21649552 | 21649552 | Bro |     |
| 13 | 21989172 | 21989172 | Jer |     |
| 13 | 22470648 | 22470648 | Her |     |
| 13 | 22611652 | 22611652 | Her |     |
| 13 | 23767720 | 23767720 | Nor |     |
| 13 | 24218141 | 24218141 | Hol |     |
| 13 | 24218141 | 24218141 | Lim |     |
| 13 | 25229684 | 25418630 |     | Guz |
| 13 | 25349272 | 25349272 | Her |     |
| 13 | 25632784 | 25632784 | Ang |     |
| 13 | 26871148 | 26871148 | Hol |     |
| 13 | 26937127 | 26937127 | Bro |     |
| 13 | 26974732 | 26974732 | Lim |     |
| 13 | 27251090 | 27251090 | Bro |     |
| 13 | 27365455 | 27365455 | Lim |     |
| 13 | 28041352 | 28041352 | Gue |     |
| 13 | 28901873 | 28901873 | Lim |     |
| 13 | 29022697 | 29022697 | Lim |     |
| 13 | 30052358 | 30052358 | Gue |     |
| 13 | 30528915 | 30528915 | Lim |     |
| 13 | 31110305 | 31110305 | Bro |     |
| 13 | 31212984 | 31212984 | Bro |     |

|    |          |          |    |     |     |
|----|----------|----------|----|-----|-----|
| 13 | 31264582 | 31264582 |    | Hol |     |
| 13 | 31582538 | 32107494 |    |     | Guz |
| 13 | 31691092 | 31691092 |    | Lim |     |
| 13 | 31861758 | 31861758 |    | Nor |     |
| 13 | 31987072 | 31987072 |    | Jer |     |
| 13 | 32251293 | 32251293 |    |     | Guz |
| 13 | 32368052 | 32368052 |    |     | Guz |
| 13 | 32793714 | 32793714 |    | Lim |     |
| 13 | 33015023 | 33015023 |    | Hol |     |
| 13 | 33184186 | 33184186 |    | Nor |     |
| 13 | 33646254 | 33646254 |    | Jer |     |
| 13 | 33881397 | 33881397 |    | Jer |     |
| 13 | 34080843 | 34080843 |    | Lim |     |
| 13 | 34119211 | 34234546 | ZT |     |     |
| 13 | 34336406 | 34554671 | ZT |     |     |
| 13 | 34659293 | 35054048 | ZT |     |     |
| 13 | 35841589 | 35841589 |    | Ang |     |
| 13 | 36614926 | 36614926 |    | Lim |     |
| 13 | 37710271 | 37710271 |    | Her |     |
| 13 | 37836399 | 37836399 |    | Ang |     |
| 13 | 37990777 | 37990777 |    | Jer |     |
| 13 | 38971698 | 39215562 |    |     | Nel |
| 13 | 41141645 | 41141645 |    | Ang |     |
| 13 | 42015567 | 42151317 |    |     | Nel |
| 13 | 42236684 | 42364607 |    |     | Gir |
| 13 | 44187504 | 44187504 |    | Nor |     |
| 13 | 45253509 | 45533567 |    |     | Gir |
| 13 | 45465713 | 45465713 |    | Her |     |
| 13 | 46174667 | 46174667 |    | Nor |     |
| 13 | 47103298 | 47103298 |    | Jer |     |
| 13 | 48893096 | 48893096 | ZT |     |     |
| 13 | 49031363 | 49197290 | ZT |     |     |
| 13 | 49300389 | 49816619 | ZT |     |     |
| 13 | 49628146 | 49847477 |    |     | Guz |
| 13 | 49963611 | 50055754 |    |     | Guz |
| 13 | 50231261 | 50291741 |    |     | Guz |
| 13 | 50291741 | 50291741 |    |     | Nel |
| 13 | 50451529 | 50451529 |    |     | Guz |
| 13 | 50451529 | 50451529 |    |     | Nel |
| 13 | 50565794 | 50644646 |    |     | Guz |
| 13 | 50565794 | 50644646 |    |     | Nel |
| 13 | 50692816 | 50692816 |    | Jer |     |
| 13 | 50760200 | 50760200 |    |     | Guz |
| 13 | 50760200 | 50760200 |    |     | Nel |
| 13 | 50869402 | 51095524 |    |     | Guz |
| 13 | 50869402 | 51095524 |    |     | Nel |
| 13 | 51214983 | 51489943 |    |     | Guz |
| 13 | 51397521 | 51397521 |    | Bro |     |

|    |          |          |     |     |
|----|----------|----------|-----|-----|
| 13 | 51604518 | 51604518 | Nor |     |
| 13 | 51616130 | 51616130 |     | Guz |
| 13 | 51755553 | 51929601 |     | Guz |
| 13 | 52030693 | 52086828 |     | Guz |
| 13 | 52215695 | 52215695 |     | Guz |
| 13 | 52309239 | 52309239 | Bro |     |
| 13 | 52352327 | 52352327 |     | Guz |
| 13 | 53370379 | 53370379 | Bro |     |
| 13 | 54019491 | 54019491 | Her |     |
| 13 | 54136766 | 54178604 | Bro |     |
| 13 | 54235658 | 54235658 | Her |     |
| 13 | 54416245 | 54416245 | Her |     |
| 13 | 54416245 | 54416245 | Hol |     |
| 13 | 54679600 | 54679600 | Jer |     |
| 13 | 56083986 | 56083986 | Bro |     |
| 13 | 58880236 | 58928119 | Ang |     |
| 13 | 60912509 | 60912509 | Bro |     |
| 13 | 61207085 | 61207085 | Her |     |
| 13 | 63023671 | 63023671 | Jer |     |
| 13 | 63287690 | 63287690 | Ang |     |
| 13 | 66357502 | 66357502 | Her |     |
| 13 | 67817498 | 67817498 | Nor |     |
| 13 | 68228050 | 68228050 | Gue |     |
| 13 | 68396195 | 68396195 | Nor |     |
| 13 | 69638087 | 69638087 | Jer |     |
| 13 | 70886673 | 70886673 | Jer |     |
| 13 | 71499910 | 71499910 | Nor |     |
| 13 | 71833920 | 71833920 | Hol |     |
| 13 | 72491288 | 72491288 | Ang |     |
| 13 | 73180097 | 73180097 | Jer |     |
| 13 | 74480533 | 74480533 | Jer |     |
| 13 | 75187129 | 75187129 | Bro |     |
| 13 | 75436349 | 75672837 |     | Nel |
| 13 | 76822779 | 76822779 | Jer |     |
| 13 | 77346284 | 77346284 | Her |     |
| 13 | 77884465 | 77944238 | Bro |     |
| 13 | 79586048 | 79586048 | Ang |     |
| 13 | 79586048 | 79586048 | Hol |     |
| 13 | 80021463 | 80021463 | Lim |     |
| 13 | 80536435 | 80536435 | Hol |     |
| 13 | 82124568 | 82124568 | Lim |     |
| 13 | 82240934 | 82240934 | Lim |     |
| 13 | 82913657 | 82913657 | Bro |     |
| 13 | 83500584 | 83500584 | Gue |     |
| 14 | 593705   | 593705   | Nor |     |
| 14 | 2580667  | 2580667  | Hol |     |
| 14 | 3734807  | 3734807  | Nor |     |
| 14 | 3852717  | 3852717  | Ang |     |

|    |          |          |    |     |     |
|----|----------|----------|----|-----|-----|
| 14 | 3942818  | 3942818  |    | Hol |     |
| 14 | 4716252  | 4716252  |    | Jer |     |
| 14 | 5095604  | 5095604  |    | Her |     |
| 14 | 5095604  | 5095604  |    | Hol |     |
| 14 | 5118510  | 5118510  |    | Gue |     |
| 14 | 5225467  | 5225467  |    | Nor |     |
| 14 | 5396141  | 5396141  |    | Nor |     |
| 14 | 5474762  | 5474762  |    | Lim |     |
| 14 | 6620615  | 6620615  |    | Ang |     |
| 14 | 6883461  | 6883461  |    | Gue |     |
| 14 | 8297461  | 8297461  |    | Jer |     |
| 14 | 8931824  | 8931824  |    | Hol |     |
| 14 | 9449027  | 9449027  |    | Nor |     |
| 14 | 9760053  | 9760053  |    | Jer |     |
| 14 | 10164698 | 10164698 |    | Ang |     |
| 14 | 10164698 | 10164698 |    | Nor |     |
| 14 | 10240454 | 10240454 |    | Her |     |
| 14 | 10941384 | 10941384 |    | Gue |     |
| 14 | 11501300 | 11501300 |    | Gue |     |
| 14 | 11554484 | 11554484 |    | Hol |     |
| 14 | 13320866 | 13320866 |    | Her |     |
| 14 | 13594566 | 13594566 |    | Nor |     |
| 14 | 16786915 | 16786915 |    | Nor |     |
| 14 | 16957863 | 16957863 |    | Her |     |
| 14 | 17760635 | 17760635 |    | Ang |     |
| 14 | 19278453 | 19278453 |    | Jer |     |
| 14 | 19426465 | 19426465 |    | Ang |     |
| 14 | 19524665 | 19524665 |    | Bro |     |
| 14 | 20269546 | 20269546 |    | Ang |     |
| 14 | 20595450 | 20595450 |    | Jer |     |
| 14 | 21725632 | 21725632 |    | Ang |     |
| 14 | 22633666 | 22633666 |    | Lim |     |
| 14 | 23477783 | 23477783 |    | Gue |     |
| 14 | 23922664 | 23922664 |    | Bro |     |
| 14 | 24603090 | 25298972 | ZT |     |     |
| 14 | 25015640 | 25015640 |    | Nor |     |
| 14 | 26126660 | 26126660 |    | Her |     |
| 14 | 28399107 | 28399107 |    | Nor |     |
| 14 | 28616985 | 28616985 |    | Bro |     |
| 14 | 28822547 | 28822547 |    | Hol |     |
| 14 | 30557994 | 30557994 |    | Her |     |
| 14 | 31497667 | 31497667 |    | Jer |     |
| 14 | 32242397 | 32242397 |    | Bro |     |
| 14 | 32961490 | 33028131 |    |     | Guz |
| 14 | 35419556 | 35419556 |    | Bro |     |
| 14 | 36487168 | 36487168 |    | Hol |     |
| 14 | 36715710 | 37511658 | ZT |     |     |
| 14 | 36829769 | 36829769 |    | Gue |     |

|    |          |          |    |     |     |
|----|----------|----------|----|-----|-----|
| 14 | 38919669 | 39027008 | ZT |     |     |
| 14 | 39024260 | 39024260 |    | Gue |     |
| 14 | 39024260 | 39024260 |    | Her |     |
| 14 | 39523938 | 39523938 |    | Jer |     |
| 14 | 40889968 | 40889968 |    | Gue |     |
| 14 | 42121450 | 42376970 | ZT |     |     |
| 14 | 43460382 | 43460382 |    | Lim |     |
| 14 | 43811139 | 43811139 |    | Lim |     |
| 14 | 44169293 | 44169293 |    | Gue |     |
| 14 | 44269436 | 44269436 |    | Bro |     |
| 14 | 44979200 | 44979200 |    | Ang |     |
| 14 | 45478315 | 46437276 | ZT |     |     |
| 14 | 46456216 | 46562573 |    | Cha |     |
| 14 | 46868870 | 46868870 |    | Her |     |
| 14 | 47201844 | 47201844 |    | Hol |     |
| 14 | 47780752 | 47780752 |    | Ang |     |
| 14 | 48337384 | 48337384 |    | Nor |     |
| 14 | 50191506 | 50191506 |    | Jer |     |
| 14 | 50502349 | 50502349 |    | Nor |     |
| 14 | 51084182 | 51084182 |    | Lim |     |
| 14 | 52415429 | 52415429 |    | Gue |     |
| 14 | 53193111 | 53193111 |    | Her |     |
| 14 | 53726449 | 53726449 |    | Lim |     |
| 14 | 54164119 | 54164119 |    | Her |     |
| 14 | 54402173 | 54402173 |    | Hol |     |
| 14 | 54636577 | 54636577 |    | Gue |     |
| 14 | 55872388 | 55872388 |    | Bro |     |
| 14 | 58831995 | 58831995 |    | Gue |     |
| 14 | 59086394 | 59086394 |    | Her |     |
| 14 | 59145420 | 59145420 |    |     | Guz |
| 14 | 59699691 | 59699691 |    | Bro |     |
| 14 | 59956308 | 59956308 |    | Ang |     |
| 14 | 61386112 | 61499185 |    |     | Guz |
| 14 | 61728798 | 61728798 |    | Jer |     |
| 14 | 62155894 | 62155894 |    | Her |     |
| 14 | 63471687 | 63471687 |    | Ang |     |
| 14 | 63971497 | 63971497 |    | Hol |     |
| 14 | 64525338 | 64525338 |    | Hol |     |
| 14 | 64892207 | 64892207 |    | Jer |     |
| 14 | 64921543 | 64921543 |    | Gue |     |
| 14 | 65425379 | 65425379 |    | Ang |     |
| 14 | 65835855 | 65835855 |    | Hol |     |
| 14 | 66153764 | 66153764 |    | Nor |     |
| 14 | 66549938 | 66549938 |    | Ang |     |
| 14 | 66610254 | 66610254 |    | Lim |     |
| 14 | 66786047 | 66924336 |    |     | Guz |
| 14 | 67314952 | 67314952 |    | Jer |     |
| 14 | 67977853 | 67977853 |    | Bro |     |

|    |          |          |     |
|----|----------|----------|-----|
| 14 | 68620692 | 68847775 | Cha |
| 14 | 68705641 | 68705641 | Hol |
| 14 | 68705641 | 68705641 | Jer |
| 14 | 68924060 | 68924060 | Ang |
| 14 | 69802514 | 69802514 | Nor |
| 14 | 73531668 | 73531668 | Gue |
| 14 | 73755259 | 73755259 | Nor |
| 14 | 74310747 | 74310747 | Nor |
| 14 | 74482108 | 74482108 | Ang |
| 14 | 77810155 | 77897196 | Nor |
| 14 | 78081859 | 78081859 | Bro |
| 14 | 78558407 | 78558407 | Gue |
| 14 | 78764654 | 78764654 | Nor |
| 14 | 80468495 | 80468495 | Bro |
| 14 | 80838143 | 80838143 | Gue |
| 14 | 81238462 | 81238462 | Hol |
| 14 | 81238462 | 81238462 | Jer |
| 14 | 81449754 | 81449754 | Gue |
| 14 | 82299086 | 82299086 | Jer |
| 14 | 82510580 | 82510580 | Hol |
| 14 | 82873341 | 82873341 | Hol |
| 14 | 83085249 | 83200348 | Cha |
| 14 | 83124356 | 83124356 | Bro |
| 14 | 83385461 | 83385461 | Jer |
| 14 | 83666534 | 83831390 | Gir |
| 14 | 83776145 | 83776145 | Ang |
| 14 | 83975039 | 83975039 | Hol |
| 14 | 84193809 | 84193809 | Her |
| 14 | 84378204 | 84378204 | Ang |
| 15 | 577326   | 577326   | Her |
| 15 | 1533401  | 1533401  | Her |
| 15 | 4518219  | 4518219  | Gue |
| 15 | 4749879  | 4749879  | Jer |
| 15 | 6063913  | 6063913  | Her |
| 15 | 6335201  | 6335201  | Jer |
| 15 | 6883177  | 6883177  | Her |
| 15 | 8803547  | 8803547  | Jer |
| 15 | 8923661  | 8923661  | Ang |
| 15 | 8963352  | 8963352  | Lim |
| 15 | 9168098  | 9168098  | Lim |
| 15 | 9959794  | 9959794  | Lim |
| 15 | 10479750 | 10479750 | Ang |
| 15 | 11505690 | 11505690 | Lim |
| 15 | 14452509 | 14452509 | Bro |
| 15 | 14452509 | 14452509 | Lim |
| 15 | 15554569 | 15554569 | Nor |
| 15 | 17527385 | 17527385 | Her |
| 15 | 18397101 | 18397101 | Gue |

|    |          |          |     |     |
|----|----------|----------|-----|-----|
| 15 | 19622027 | 19622027 | Her |     |
| 15 | 19813387 | 19813387 | Gue |     |
| 15 | 20544975 | 20544975 | Jer |     |
| 15 | 20702646 | 20702646 | Lim |     |
| 15 | 20748077 | 20748077 | Her |     |
| 15 | 24107618 | 24107618 | Ang |     |
| 15 | 25191633 | 25191633 | Gue |     |
| 15 | 26219411 | 26219411 | Bro |     |
| 15 | 27461860 | 27461860 | Gue |     |
| 15 | 28187349 | 28187349 | Gue |     |
| 15 | 29099098 | 29099098 | Her |     |
| 15 | 29427085 | 29427085 | Hol |     |
| 15 | 30219463 | 30219463 | Jer |     |
| 15 | 30794937 | 30794937 | Nor |     |
| 15 | 31146406 | 31146406 | Lim |     |
| 15 | 31593742 | 31671928 | Gue |     |
| 15 | 31745902 | 31745902 | Jer |     |
| 15 | 32060613 | 32060613 | Lim |     |
| 15 | 32474091 | 32474091 | Gue |     |
| 15 | 33781326 | 33781326 | Lim |     |
| 15 | 34174802 | 34174802 | Nor |     |
| 15 | 34791323 | 34791323 | Ang |     |
| 15 | 35293898 | 35293898 | Her |     |
| 15 | 35442019 | 35442019 | Her |     |
| 15 | 35577401 | 35577401 | Ang |     |
| 15 | 37735270 | 37735270 | Gue |     |
| 15 | 37920515 | 37920515 | Hol |     |
| 15 | 37953561 | 37953561 | Lim |     |
| 15 | 38488528 | 38488528 | Bro |     |
| 15 | 38787942 | 38787942 | Gue |     |
| 15 | 39384673 | 39384673 | Lim |     |
| 15 | 40192007 | 40192007 | Jer |     |
| 15 | 40316847 | 40316847 | Gue |     |
| 15 | 40450742 | 40450742 | Her |     |
| 15 | 41157757 | 41157757 | Ang |     |
| 15 | 41609973 | 41609973 | Jer |     |
| 15 | 41832209 | 41832209 | Bro |     |
| 15 | 42021233 | 42370575 |     | Nel |
| 15 | 42155423 | 42370575 |     | Guz |
| 15 | 42478754 | 42559771 |     | Nel |
| 15 | 42591956 | 42591956 | Hol |     |
| 15 | 44726542 | 44726542 | Bro |     |
| 15 | 44939719 | 44939719 | Hol |     |
| 15 | 46005939 | 46005939 | Gue |     |
| 15 | 47017013 | 47017013 | Her |     |
| 15 | 47605562 | 47605562 | Her |     |
| 15 | 47797093 | 47797093 | Lim |     |
| 15 | 49571663 | 49571663 | Hol |     |

|    |          |          |     |     |
|----|----------|----------|-----|-----|
| 15 | 51548685 | 51548685 | Jer |     |
| 15 | 52323484 | 52323484 | Her |     |
| 15 | 52420655 | 52420655 | Lim |     |
| 15 | 52869669 | 52869669 | Nor |     |
| 15 | 54216680 | 54216680 | Her |     |
| 15 | 55884002 | 55884002 | Lim |     |
| 15 | 56445798 | 56445798 | Nor |     |
| 15 | 56820572 | 56820572 | Lim |     |
| 15 | 57243853 | 57243853 | Nor |     |
| 15 | 57287768 | 57287768 | Gue |     |
| 15 | 57599024 | 57599024 | Nor |     |
| 15 | 58497739 | 58497739 | Lim |     |
| 15 | 58746126 | 58746126 | Hol |     |
| 15 | 59308913 | 59308913 | Jer |     |
| 15 | 59620713 | 59620713 | Jer |     |
| 15 | 61230076 | 61230076 | Her |     |
| 15 | 61636045 | 61636045 | Lim |     |
| 15 | 61906679 | 61906679 | Jer |     |
| 15 | 63453218 | 63453218 | Nor |     |
| 15 | 64571517 | 64571517 | Jer |     |
| 15 | 65142614 | 65142614 | Bro |     |
| 15 | 65804969 | 65804969 | Ang |     |
| 15 | 66064827 | 66133731 | Hol |     |
| 15 | 66309896 | 66309896 | Lim |     |
| 15 | 66853433 | 67024310 |     | Gir |
| 15 | 67679022 | 67679022 | Jer |     |
| 15 | 69941897 | 69941897 | Her |     |
| 15 | 70174702 | 70174702 | Her |     |
| 15 | 70990116 | 70990116 | Nor |     |
| 15 | 71307101 | 71307101 | Nor |     |
| 15 | 72387341 | 72387341 | Her |     |
| 15 | 72706627 | 72738024 |     | Nel |
| 15 | 72760977 | 72760977 | Hol |     |
| 15 | 73905238 | 73905238 | Gue |     |
| 15 | 73984029 | 73984029 | Ang |     |
| 15 | 73984029 | 73984029 | Jer |     |
| 15 | 74290188 | 74290188 |     | Nel |
| 15 | 74423905 | 74524111 |     | Nel |
| 15 | 74501976 | 74501976 | Her |     |
| 15 | 74955442 | 74955442 | Lim |     |
| 15 | 75376248 | 75376248 | Hol |     |
| 15 | 75749702 | 75749702 | Jer |     |
| 15 | 76425084 | 76425084 | Ang |     |
| 15 | 76425084 | 76425084 | Nor |     |
| 15 | 77456598 | 77456598 | Jer |     |
| 15 | 78305649 | 78305649 | Bro |     |
| 15 | 78770047 | 78770047 | Bro |     |
| 15 | 78896843 | 78896843 | Gue |     |



|    |          |          |     |     |
|----|----------|----------|-----|-----|
| 15 | 81230124 | 81230124 | Jer |     |
| 15 | 81583592 | 81583592 | Bro |     |
| 15 | 82180549 | 82180549 | Gue |     |
| 15 | 83664314 | 83664314 | Ang |     |
| 15 | 83952725 | 83974893 | Ang |     |
| 15 | 85085535 | 85085535 | Ang |     |
| 16 | 950232   | 950232   | Ang |     |
| 16 | 950232   | 950232   | Her |     |
| 16 | 1951374  | 1951374  | Nor |     |
| 16 | 3513917  | 3513917  | Ang |     |
| 16 | 4154922  | 4154922  | Hol |     |
| 16 | 4294296  | 4340374  | Gue |     |
| 16 | 4544485  | 4544485  | Nor |     |
| 16 | 9474801  | 9474801  | Ang |     |
| 16 | 9929930  | 9929930  | Jer |     |
| 16 | 12902221 | 12902221 | Ang |     |
| 16 | 13021637 | 13021637 | Her |     |
| 16 | 14329324 | 14405522 | Nor |     |
| 16 | 15297195 | 15297195 | Her |     |
| 16 | 15416252 | 15416252 | Jer |     |
| 16 | 15655956 | 15655956 | Bro |     |
| 16 | 15771063 | 15771063 | Jer |     |
| 16 | 16030130 | 16030130 | Lim |     |
| 16 | 16136785 | 16136785 | Lim |     |
| 16 | 16398298 | 16398298 | Hol |     |
| 16 | 17508199 | 17508199 | Her |     |
| 16 | 17974220 | 17974220 | Nor |     |
| 16 | 18263233 | 18263233 | Hol |     |
| 16 | 18818921 | 18818921 | Her |     |
| 16 | 19528648 | 19528648 | Jer |     |
| 16 | 19691718 | 19691718 | Nor |     |
| 16 | 20356811 | 20356811 | Gue |     |
| 16 | 20629654 | 20629654 | Gue |     |
| 16 | 20721140 | 20721140 | Her |     |
| 16 | 20780071 | 20780071 | Lim |     |
| 16 | 21058625 | 21058625 | Lim |     |
| 16 | 22165889 | 22165889 | Lim |     |
| 16 | 22743482 | 22743482 | Her |     |
| 16 | 23194508 | 23194508 | Lim |     |
| 16 | 23435304 | 23435304 | Her |     |
| 16 | 24415438 | 24984384 | Cha |     |
| 16 | 24503655 | 24503655 | Lim |     |
| 16 | 24682103 | 24856863 |     | Nel |
| 16 | 24710520 | 24845497 | Bro |     |
| 16 | 24710520 | 24845497 | Gue |     |
| 16 | 24740093 | 24740093 | Ang |     |
| 16 | 25407599 | 25407599 | Ang |     |
| 16 | 25407599 | 25407599 | Gue |     |

|    |          |          |    |     |     |
|----|----------|----------|----|-----|-----|
| 16 | 25407599 | 25407599 |    | Hol |     |
| 16 | 26080421 | 26080421 |    | Jer |     |
| 16 | 26300274 | 26300274 |    | Ang |     |
| 16 | 26599441 | 26599441 |    | Ang |     |
| 16 | 26992388 | 26992388 |    | Hol |     |
| 16 | 27360346 | 27360346 |    | Hol |     |
| 16 | 27592472 | 27592472 |    | Her |     |
| 16 | 27618028 | 27618028 |    | Nor |     |
| 16 | 27857164 | 27857164 |    | Nor |     |
| 16 | 28785286 | 28960102 |    |     | Gir |
| 16 | 29189081 | 29189081 |    | Nor |     |
| 16 | 30143682 | 30143682 |    | Nor |     |
| 16 | 30228692 | 30228692 |    | Gue |     |
| 16 | 30551740 | 30551740 |    | Her |     |
| 16 | 30618697 | 30618697 |    | Ang |     |
| 16 | 30991351 | 30991351 |    | Nor |     |
| 16 | 31793568 | 31793568 |    | Hol |     |
| 16 | 31793568 | 31793568 |    | Jer |     |
| 16 | 31929371 | 31929371 |    | Ang |     |
| 16 | 33496176 | 33496176 |    | Ang |     |
| 16 | 33496176 | 33496176 |    | Hol |     |
| 16 | 33496176 | 33496176 |    | Jer |     |
| 16 | 35128071 | 35128071 |    | Lim |     |
| 16 | 36397735 | 36397735 |    | Nor |     |
| 16 | 36882994 | 36882994 |    | Hol |     |
| 16 | 36882994 | 36882994 |    | Nor |     |
| 16 | 38757722 | 38757722 |    | Her |     |
| 16 | 39086170 | 39086170 |    | Hol |     |
| 16 | 40044051 | 40309659 |    |     | Gir |
| 16 | 40318965 | 40545245 | ZT |     |     |
| 16 | 40656961 | 40656961 | ZT |     |     |
| 16 | 40886797 | 41149860 | ZT |     |     |
| 16 | 41453104 | 41453104 |    | Lim |     |
| 16 | 41564542 | 41564542 | ZT |     |     |
| 16 | 41672654 | 41767607 | ZT |     |     |
| 16 | 41775870 | 41775870 |    | Jer |     |
| 16 | 41877813 | 42407997 | ZT |     |     |
| 16 | 42667035 | 42667035 |    | Nor |     |
| 16 | 43250880 | 43313085 | ZT |     |     |
| 16 | 43419087 | 43501100 | ZT |     |     |
| 16 | 44277286 | 45534177 | ZT |     |     |
| 16 | 44584439 | 44584439 |    | Hol |     |
| 16 | 44879718 | 44879718 |    | Nor |     |
| 16 | 45232127 | 45919794 |    |     | Guz |
| 16 | 45433371 | 45773321 |    |     | Nel |
| 16 | 46038878 | 46038878 |    |     | Guz |
| 16 | 46970643 | 46970643 |    | Ang |     |
| 16 | 47442862 | 47442862 |    | Jer |     |

|    |          |          |     |     |
|----|----------|----------|-----|-----|
| 16 | 47894912 | 47894912 | Ang |     |
| 16 | 47894912 | 47894912 | Nor |     |
| 16 | 47974232 | 47974232 | Bro |     |
| 16 | 48326002 | 48326002 | Her |     |
| 16 | 48504078 | 48504078 | Hol |     |
| 16 | 48504078 | 48504078 | Nor |     |
| 16 | 48836104 | 48836104 | Gue |     |
| 16 | 49045020 | 49045020 |     | Guz |
| 16 | 49590524 | 49590524 | Hol |     |
| 16 | 50501339 | 50501339 | Jer |     |
| 16 | 51661530 | 51661530 | Jer |     |
| 16 | 52389421 | 52389421 | Ang |     |
| 16 | 53741575 | 53741575 | Lim |     |
| 16 | 53783614 | 53783614 | Nor |     |
| 16 | 53826914 | 53826914 | Bro |     |
| 16 | 56867692 | 56867692 | Hol |     |
| 16 | 57858883 | 57858883 | Bro |     |
| 16 | 58022121 | 58022121 | Ang |     |
| 16 | 58895036 | 59521908 |     | Guz |
| 16 | 58938382 | 58938382 | Lim |     |
| 16 | 59033013 | 59345789 |     | Nel |
| 16 | 59301385 | 59301385 | Nor |     |
| 16 | 60023796 | 60023796 | Hol |     |
| 16 | 60497162 | 60540206 |     | Nel |
| 16 | 61056572 | 61056572 | Nor |     |
| 16 | 61686279 | 61686279 | Lim |     |
| 16 | 61728924 | 61757564 | Her |     |
| 16 | 62564542 | 62564542 | Ang |     |
| 16 | 62564542 | 62661510 | Gue |     |
| 16 | 62564542 | 62564542 | Nor |     |
| 16 | 62935327 | 62935327 | Bro |     |
| 16 | 64704446 | 65339532 |     | Nel |
| 16 | 65313199 | 65313199 | Hol |     |
| 16 | 68076567 | 68076567 | Bro |     |
| 16 | 68525706 | 68525706 | Nor |     |
| 16 | 68663695 | 69853720 |     | Guz |
| 16 | 68730323 | 68920589 |     | Nel |
| 16 | 68935940 | 68935940 | Lim |     |
| 16 | 69010341 | 69010341 | Bro |     |
| 16 | 69061411 | 69853720 |     | Nel |
| 16 | 69205352 | 69808147 |     | Gir |
| 16 | 69263110 | 69263110 | Hol |     |
| 16 | 71035322 | 71035322 | Ang |     |
| 16 | 71562994 | 71562994 | Her |     |
| 16 | 74300380 | 74300380 | Lim |     |
| 16 | 74656398 | 74656398 | Lim |     |
| 16 | 74784360 | 74784360 | Her |     |
| 16 | 75455078 | 75455078 | Hol |     |

|    |          |          |     |     |
|----|----------|----------|-----|-----|
| 16 | 75580704 | 75580704 | Hol |     |
| 16 | 76531079 | 76531079 | Ang |     |
| 16 | 77398493 | 77398493 | Jer |     |
| 16 | 77571128 | 77571128 | Gue |     |
| 16 | 77678176 | 77678176 | Nor |     |
| 16 | 78102411 | 78102411 | Ang |     |
| 16 | 78174119 | 78596042 |     | Guz |
| 16 | 78257225 | 78257225 | Hol |     |
| 16 | 79746720 | 79746720 | Gue |     |
| 16 | 80114473 | 80114473 | Ang |     |
| 16 | 81672961 | 81672961 | Jer |     |
| 17 | 852669   | 852669   | Jer |     |
| 17 | 1781813  | 1781813  | Hol |     |
| 17 | 2321511  | 2321511  | Gue |     |
| 17 | 2607518  | 2607518  | Hol |     |
| 17 | 3149962  | 3149962  | Hol |     |
| 17 | 4791944  | 4791944  | Jer |     |
| 17 | 4834929  | 4834929  | Her |     |
| 17 | 5549379  | 5549379  | Hol |     |
| 17 | 6662551  | 6662551  | Lim |     |
| 17 | 7658075  | 7658075  | Gue |     |
| 17 | 7765177  | 7765177  | Gue |     |
| 17 | 8067629  | 8067629  | Her |     |
| 17 | 8335532  | 8335532  | Her |     |
| 17 | 8410348  | 8410348  | Ang |     |
| 17 | 8410348  | 8410348  | Nor |     |
| 17 | 9912468  | 9912468  | Bro |     |
| 17 | 9981281  | 9981281  | Gue |     |
| 17 | 10319304 | 10319304 | Gue |     |
| 17 | 10335313 | 10335313 | Her |     |
| 17 | 10967262 | 10967262 | Hol |     |
| 17 | 11541627 | 11541627 | Bro |     |
| 17 | 11667404 | 11667404 | Jer |     |
| 17 | 12245185 | 12245185 | Ang |     |
| 17 | 12678479 | 12678479 | Ang |     |
| 17 | 12713251 | 12713251 | Lim |     |
| 17 | 12857924 | 12857924 | Gue |     |
| 17 | 14191364 | 14191364 | Hol |     |
| 17 | 16585610 | 16585610 | Hol |     |
| 17 | 16668439 | 16668439 | Her |     |
| 17 | 16712824 | 16712824 | Ang |     |
| 17 | 17126550 | 17126550 | Ang |     |
| 17 | 18216663 | 18216663 | Lim |     |
| 17 | 18335608 | 18335608 | Nor |     |
| 17 | 19236474 | 19236474 | Hol |     |
| 17 | 19771813 | 19771813 | Hol |     |
| 17 | 20462863 | 20462863 | Bro |     |
| 17 | 21280317 | 21280317 | Gue |     |

|    |          |          |     |
|----|----------|----------|-----|
| 17 | 21627514 | 21627514 | Her |
| 17 | 22012082 | 22012082 | Hol |
| 17 | 22384870 | 22384870 | Her |
| 17 | 23219327 | 23219327 | Bro |
| 17 | 23440483 | 23440483 | Hol |
| 17 | 23686714 | 23686714 | Nor |
| 17 | 24774230 | 24774230 | Jer |
| 17 | 27057425 | 27057425 | Her |
| 17 | 28502802 | 28502802 | Gue |
| 17 | 32589781 | 32589781 | Lim |
| 17 | 34443645 | 34443645 | Ang |
| 17 | 34620959 | 34620959 | Hol |
| 17 | 34675555 | 34953139 | Cha |
| 17 | 34953139 | 34953139 | Hol |
| 17 | 36502591 | 36502591 | Gue |
| 17 | 36502591 | 36502591 | Her |
| 17 | 36571163 | 36935056 | Cha |
| 17 | 36602912 | 36602912 | Lim |
| 17 | 36778666 | 36778666 | Lim |
| 17 | 36935056 | 36935056 | Her |
| 17 | 37300822 | 37300822 | Ang |
| 17 | 38832181 | 38832181 | Bro |
| 17 | 38832181 | 38832181 | Gue |
| 17 | 39288058 | 39288058 | Hol |
| 17 | 39347048 | 39347048 | Jer |
| 17 | 39933636 | 39933636 | Gue |
| 17 | 40004303 | 40289698 | Cha |
| 17 | 40192981 | 40226461 | Ang |
| 17 | 40478595 | 40535983 | Hol |
| 17 | 40478595 | 40478595 | Jer |
| 17 | 40597804 | 40597804 | Lim |
| 17 | 41526248 | 41526248 | Ang |
| 17 | 41701959 | 41701959 | Jer |
| 17 | 43711813 | 43711813 | Her |
| 17 | 44303353 | 44303353 | Jer |
| 17 | 44303353 | 44303353 | Lim |
| 17 | 44694694 | 44694694 | Jer |
| 17 | 47123292 | 47123292 | Bro |
| 17 | 47123292 | 47123292 | Gue |
| 17 | 47335871 | 47335871 | Bro |
| 17 | 47876580 | 47876580 | Hol |
| 17 | 48049218 | 48049218 | Lim |
| 17 | 48737633 | 48737633 | Bro |
| 17 | 48800637 | 48800637 | Jer |
| 17 | 48846124 | 48904473 | Her |
| 17 | 49183026 | 49183026 | Jer |
| 17 | 52267308 | 52267308 | Gue |
| 17 | 52526310 | 52526310 | Ang |

|    |          |          |     |     |
|----|----------|----------|-----|-----|
| 17 | 52604653 | 52604653 | Lim |     |
| 17 | 52768653 | 52768653 | Lim |     |
| 17 | 52811292 | 52811292 | Gue |     |
| 17 | 52998036 | 52998036 | Gue |     |
| 17 | 53452610 | 53452610 | Ang |     |
| 17 | 53452610 | 53894855 | Cha |     |
| 17 | 53452610 | 53452610 | Hol |     |
| 17 | 53562854 | 53562854 | Lim |     |
| 17 | 53719313 | 53719313 | Bro |     |
| 17 | 53966240 | 53966240 | Ang |     |
| 17 | 54425265 | 54425265 | Lim |     |
| 17 | 54495107 | 54495107 | Her |     |
| 17 | 54738535 | 54738535 | Hol |     |
| 17 | 54800208 | 55184003 | Cha |     |
| 17 | 54938787 | 54938787 | Bro |     |
| 17 | 55247896 | 55247896 | Gue |     |
| 17 | 55646327 | 55646327 | Gue |     |
| 17 | 56264668 | 56264668 | Gue |     |
| 17 | 56390012 | 56390012 | Ang |     |
| 17 | 56488289 | 56488289 | Hol |     |
| 17 | 56826610 | 56915577 |     | Nel |
| 17 | 56975285 | 56975285 | Jer |     |
| 17 | 57289572 | 57289572 | Jer |     |
| 17 | 58025358 | 58025358 | Bro |     |
| 17 | 58419025 | 58419025 | Hol |     |
| 17 | 58536079 | 58536079 | Hol |     |
| 17 | 59570096 | 59570096 |     | Gir |
| 17 | 61012828 | 61012828 | Jer |     |
| 17 | 61745667 | 61745667 | Gue |     |
| 17 | 61745667 | 61745667 | Jer |     |
| 17 | 62091890 | 62091890 | Lim |     |
| 17 | 62437757 | 62437757 | Lim |     |
| 17 | 62883633 | 62883633 | Lim |     |
| 17 | 63080286 | 63080286 | Gue |     |
| 17 | 63185013 | 63356608 | Cha |     |
| 17 | 63315449 | 63315449 | Bro |     |
| 17 | 63593490 | 63593490 | Gue |     |
| 17 | 63765280 | 63765280 | Hol |     |
| 17 | 64337986 | 64337986 | Hol |     |
| 17 | 65431771 | 65431771 | Hol |     |
| 17 | 65724202 | 65724202 | Gue |     |
| 17 | 65795029 | 65795029 | Her |     |
| 17 | 65985836 | 65985836 | Gue |     |
| 17 | 66404458 | 66404458 | Jer |     |
| 17 | 66807833 | 66807833 | Gue |     |
| 17 | 66879214 | 66879214 | Ang |     |
| 17 | 67975896 | 68078441 |     | Nel |
| 17 | 68579649 | 68579649 | Lim |     |

|    |          |          |     |     |
|----|----------|----------|-----|-----|
| 17 | 68612895 | 68612895 | Gue |     |
| 17 | 68642664 | 68642664 | Nor |     |
| 17 | 68882202 | 68882202 | Her |     |
| 17 | 69359168 | 70008031 |     | Guz |
| 17 | 69496828 | 69727937 |     | Nel |
| 17 | 70166943 | 70166943 |     | Guz |
| 17 | 70797006 | 70797006 | Bro |     |
| 17 | 70913770 | 70913770 | Lim |     |
| 17 | 71139021 | 71139021 | Gue |     |
| 17 | 71675771 | 71675771 | Hol |     |
| 17 | 72189054 | 72189054 | Ang |     |
| 17 | 72189054 | 72189054 | Gue |     |
| 17 | 73083885 | 73083885 | Lim |     |
| 17 | 73224194 | 73224194 | Nor |     |
| 17 | 73878627 | 73878627 | Nor |     |
| 17 | 74235267 | 74292319 | Ang |     |
| 17 | 74235267 | 74235267 | Nor |     |
| 17 | 74412830 | 74412830 | Her |     |
| 18 | 514332   | 514332   | Her |     |
| 18 | 806069   | 806069   | Jer |     |
| 18 | 959986   | 959986   | Lim |     |
| 18 | 1653679  | 1653679  | Jer |     |
| 18 | 3349402  | 3349402  | Jer |     |
| 18 | 3835280  | 3835280  | Ang |     |
| 18 | 4541123  | 4541123  | Jer |     |
| 18 | 5279153  | 5279153  | Bro |     |
| 18 | 5319149  | 5440260  | Cha |     |
| 18 | 5417593  | 5417593  | Bro |     |
| 18 | 5514066  | 5514066  | Ang |     |
| 18 | 5606378  | 5606378  | Lim |     |
| 18 | 6053445  | 6053445  | Her |     |
| 18 | 6311708  | 6311708  | Bro |     |
| 18 | 6792097  | 6792097  | Jer |     |
| 18 | 8207165  | 8349174  | Cha |     |
| 18 | 8267599  | 8267599  | Hol |     |
| 18 | 8310093  | 8310093  | Bro |     |
| 18 | 8310093  | 8310093  | Gue |     |
| 18 | 8461263  | 8461263  | Hol |     |
| 18 | 9101606  | 9101606  | Hol |     |
| 18 | 9449975  | 9449975  | Hol |     |
| 18 | 9662984  | 9662984  | Gue |     |
| 18 | 9662984  | 9662984  | Jer |     |
| 18 | 10215813 | 10215813 | Hol |     |
| 18 | 10507911 | 10507911 | Bro |     |
| 18 | 10618754 | 10618754 | Bro |     |
| 18 | 11061389 | 11061389 | Her |     |
| 18 | 11147240 | 11147240 | Hol |     |
| 18 | 11298096 | 11372486 |     |     |

|    |          |          |    |     |     |
|----|----------|----------|----|-----|-----|
| 18 | 11484200 | 11959392 | ZT |     |     |
| 18 | 11605447 | 11605447 |    | Bro |     |
| 18 | 14171624 | 14702657 | ZT |     |     |
| 18 | 15167441 | 15167441 |    | Ang |     |
| 18 | 15167441 | 15167441 |    | Hol |     |
| 18 | 15659112 | 15659112 |    | Her |     |
| 18 | 15659112 | 15659112 |    | Hol |     |
| 18 | 15739507 | 16095680 |    |     | Gir |
| 18 | 16199824 | 16418196 |    |     | Gir |
| 18 | 17269742 | 17269742 |    | Bro |     |
| 18 | 17272777 | 17548027 |    |     | Nel |
| 18 | 17560586 | 17560586 |    | Lim |     |
| 18 | 18424292 | 18424292 |    | Jer |     |
| 18 | 19492608 | 19492608 |    | Gue |     |
| 18 | 19738288 | 19738288 |    | Her |     |
| 18 | 23118542 | 23118542 |    | Lim |     |
| 18 | 23347562 | 23347562 |    | Lim |     |
| 18 | 24531834 | 24531834 |    | Her |     |
| 18 | 25073940 | 25073940 |    | Gue |     |
| 18 | 25804502 | 25804502 |    | Jer |     |
| 18 | 26289657 | 26289657 |    | Hol |     |
| 18 | 28641862 | 28703331 |    |     | Nel |
| 18 | 28852172 | 28939981 |    |     | Nel |
| 18 | 29073309 | 29120448 |    |     | Nel |
| 18 | 29223607 | 29223607 |    | Ang |     |
| 18 | 30500066 | 30500066 |    | Her |     |
| 18 | 30705918 | 30705918 |    | Hol |     |
| 18 | 31614885 | 31614885 |    | Her |     |
| 18 | 31661075 | 31661075 |    | Gue |     |
| 18 | 32416748 | 32416748 |    | Jer |     |
| 18 | 33293455 | 33293455 |    | Bro |     |
| 18 | 33395535 | 33395535 |    | Her |     |
| 18 | 33622799 | 33622799 |    | Ang |     |
| 18 | 33992332 | 33992332 |    | Bro |     |
| 18 | 34030879 | 34030879 |    | Jer |     |
| 18 | 36674600 | 36674600 |    | Nor |     |
| 18 | 37545832 | 37545832 |    | Nor |     |
| 18 | 37573172 | 37573172 |    | Ang |     |
| 18 | 37573172 | 37573172 |    | Hol |     |
| 18 | 38323757 | 38323757 |    | Lim |     |
| 18 | 39780582 | 39780582 |    | Hol |     |
| 18 | 40864318 | 40864318 |    | Lim |     |
| 18 | 41280825 | 41280825 |    | Hol |     |
| 18 | 43518866 | 43518866 |    | Ang |     |
| 18 | 43975857 | 43975857 |    | Bro |     |
| 18 | 45402866 | 45402866 |    | Gue |     |
| 18 | 46033080 | 46033080 |    | Her |     |
| 18 | 47130199 | 47130199 |    | Gue |     |



|    |          |          |     |
|----|----------|----------|-----|
| 18 | 47311006 | 47311006 | Lim |
| 18 | 47909267 | 47909267 | Bro |
| 18 | 48314149 | 48314149 | Gue |
| 18 | 50305250 | 50305250 | Her |
| 18 | 51153494 | 51153494 | Gue |
| 18 | 52370981 | 52370981 | Bro |
| 18 | 52609336 | 52609336 | Her |
| 18 | 54276361 | 54276361 | Ang |
| 18 | 54852067 | 54852067 | Nor |
| 18 | 55819899 | 55819899 | Bro |
| 18 | 58047616 | 58047616 | Ang |
| 18 | 58459210 | 58459210 | Hol |
| 18 | 59835694 | 59835694 | Bro |
| 18 | 60467996 | 60467996 | Hol |
| 18 | 60467996 | 60467996 | Nor |
| 18 | 62253639 | 62253639 | Jer |
| 18 | 62695412 | 62695412 | Hol |
| 18 | 63020277 | 63020277 | Ang |
| 18 | 63457199 | 63457199 | Bro |
| 18 | 64137120 | 64137120 | Bro |
| 18 | 65097218 | 65097218 | Hol |
| 19 | 2609059  | 2609059  | Bro |
| 19 | 2609059  | 2609059  | Gue |
| 19 | 2924545  | 2924545  | Hol |
| 19 | 3216655  | 3216655  | Nor |
| 19 | 3710275  | 3710275  | Nor |
| 19 | 4268920  | 4268920  | Gue |
| 19 | 5622026  | 5622026  | Ang |
| 19 | 5806258  | 5806258  | Ang |
| 19 | 7145391  | 7145391  | Her |
| 19 | 8802707  | 8802707  | Bro |
| 19 | 9621306  | 9621306  | Nor |
| 19 | 9739269  | 9739269  | Hol |
| 19 | 10671018 | 10671018 | Bro |
| 19 | 11188424 | 11188424 | Her |
| 19 | 11535729 | 11535729 | Ang |
| 19 | 11535729 | 11535729 | Hol |
| 19 | 11535729 | 11535729 | Jer |
| 19 | 12063906 | 12201723 | Cha |
| 19 | 12201723 | 12201723 | Lim |
| 19 | 12251625 | 12251625 | Bro |
| 19 | 12955639 | 12955639 | Her |
| 19 | 13423217 | 13423217 | Bro |
| 19 | 13840644 | 13840644 | Her |
| 19 | 14274648 | 14274648 | Ang |
| 19 | 14525387 | 14525387 | Gue |
| 19 | 15293355 | 15293355 | Bro |
| 19 | 15442296 | 15442296 | Ang |

|    |          |          |     |
|----|----------|----------|-----|
| 19 | 15442296 | 15442296 | Jer |
| 19 | 16180128 | 16180128 | Bro |
| 19 | 17208514 | 17208514 | Her |
| 19 | 17693331 | 17693331 | Bro |
| 19 | 17910717 | 17910717 | Lim |
| 19 | 18156962 | 18156962 | Hol |
| 19 | 18380038 | 18380038 | Gue |
| 19 | 18419654 | 18419654 | Hol |
| 19 | 19034517 | 19034517 | Her |
| 19 | 19577234 | 19577234 | Gue |
| 19 | 20878990 | 20878990 | Jer |
| 19 | 20945594 | 20945594 | Gue |
| 19 | 21758532 | 21758532 | Hol |
| 19 | 22386428 | 22386428 | Lim |
| 19 | 22540340 | 22540340 | Lim |
| 19 | 22587535 | 22587535 | Bro |
| 19 | 22623108 | 22623108 | Gue |
| 19 | 23038861 | 23038861 | Lim |
| 19 | 23211385 | 23529957 | Cha |
| 19 | 23253079 | 23253079 | Lim |
| 19 | 23400125 | 23400125 | Ang |
| 19 | 23465768 | 23494003 | Gue |
| 19 | 23494003 | 23529957 | Bro |
| 19 | 23511125 | 23511125 | Nor |
| 19 | 23621511 | 23621511 | Gue |
| 19 | 23650335 | 23650335 | Lim |
| 19 | 25304574 | 25304574 | Bro |
| 19 | 25669872 | 25669872 | Her |
| 19 | 26087727 | 26087727 | Her |
| 19 | 27340012 | 27340012 | Her |
| 19 | 28644586 | 28644586 | Hol |
| 19 | 29715194 | 29715194 | Ang |
| 19 | 29715194 | 29715194 | Nor |
| 19 | 29970036 | 29970036 | Hol |
| 19 | 30291199 | 30291199 | Gue |
| 19 | 30291199 | 30291199 | Her |
| 19 | 31400400 | 31400400 | Ang |
| 19 | 33103125 | 33103125 | Her |
| 19 | 33633705 | 33633705 | Ang |
| 19 | 34533313 | 34533313 | Gue |
| 19 | 36727804 | 36727804 | Nor |
| 19 | 37041794 | 37041794 | Gue |
| 19 | 37693334 | 37693334 | Bro |
| 19 | 38089892 | 38089892 | Nor |
| 19 | 38474828 | 38474828 | Ang |
| 19 | 41584389 | 41584389 | Ang |
| 19 | 41584389 | 41665727 | Nor |
| 19 | 42757515 | 42757515 | Jer |

|    |          |          |    |     |
|----|----------|----------|----|-----|
| 19 | 46370360 | 46370360 |    | Lim |
| 19 | 46477611 | 46477611 |    | Hol |
| 19 | 46580893 | 46580893 |    | Gue |
| 19 | 46696973 | 46696973 |    | Her |
| 19 | 47473217 | 47473217 |    | Hol |
| 19 | 48607730 | 48607730 |    | Bro |
| 19 | 49080697 | 49149854 |    | Lim |
| 19 | 49445681 | 49445681 |    | Gue |
| 19 | 49704150 | 49704150 |    | Gue |
| 19 | 50087148 | 50087148 |    | Gue |
| 19 | 50164188 | 50218827 |    | Lim |
| 19 | 51718265 | 51718265 |    | Lim |
| 19 | 53871632 | 53871632 |    | Her |
| 19 | 54191766 | 54191766 |    | Jer |
| 19 | 55330510 | 55330510 |    | Jer |
| 19 | 55460966 | 55460966 |    | Hol |
| 19 | 55511768 | 55511768 |    | Lim |
| 19 | 56080387 | 56080387 |    | Bro |
| 19 | 57805558 | 57805558 |    | Hol |
| 19 | 59282431 | 59282431 |    | Ang |
| 19 | 59718254 | 59718254 |    | Hol |
| 19 | 60271884 | 60271884 |    | Bro |
| 19 | 61021458 | 61021458 |    | Gue |
| 19 | 61021458 | 61021458 |    | Nor |
| 19 | 61160708 | 61160708 |    | Hol |
| 19 | 62726258 | 62726258 |    | Jer |
| 19 | 62956338 | 62956338 |    | Her |
| 19 | 63511364 | 63511364 |    | Gue |
| 19 | 63511364 | 63511364 |    | Nor |
| 20 | 220247   | 220247   |    | Nor |
| 20 | 276942   | 276942   |    | Bro |
| 20 | 434778   | 434778   |    | Jer |
| 20 | 1321610  | 1321610  |    | Her |
| 20 | 1798415  | 1798415  |    | Her |
| 20 | 1868761  | 1868761  |    | Jer |
| 20 | 1892651  | 1892651  |    | Lim |
| 20 | 6991289  | 6991289  |    | Lim |
| 20 | 8327825  | 8327825  |    | Ang |
| 20 | 9123270  | 9123270  |    | Ang |
| 20 | 9504319  | 9504319  |    | Gue |
| 20 | 10113604 | 10113604 |    | Ang |
| 20 | 10520408 | 10520408 |    | Ang |
| 20 | 10762327 | 10762327 |    | Ang |
| 20 | 11177346 | 11177346 |    | Her |
| 20 | 13714109 | 14014051 | ZT |     |
| 20 | 14121548 | 14441958 | ZT |     |
| 20 | 14563004 | 14563004 | ZT |     |
| 20 | 14708423 | 14708423 | ZT |     |

|    |          |          |    |     |     |
|----|----------|----------|----|-----|-----|
| 20 | 14822650 | 15011780 | ZT |     |     |
| 20 | 15135107 | 15135107 | ZT |     |     |
| 20 | 15329597 | 15329597 |    | Ang |     |
| 20 | 17454072 | 17454072 |    | Hol |     |
| 20 | 20545621 | 20545621 |    | Gue |     |
| 20 | 21661324 | 21661324 |    | Bro |     |
| 20 | 21896629 | 21896629 |    | Ang |     |
| 20 | 22150287 | 22150287 |    | Jer |     |
| 20 | 23017834 | 23017834 |    | Nor |     |
| 20 | 25779683 | 25779683 |    | Bro |     |
| 20 | 26335111 | 26335111 |    | Nor |     |
| 20 | 26707247 | 26707247 |    | Her |     |
| 20 | 27748175 | 27748175 |    | Her |     |
| 20 | 27803244 | 27909789 |    |     | Nel |
| 20 | 28546796 | 28546796 |    | Her |     |
| 20 | 28836898 | 28836898 |    | Ang |     |
| 20 | 29419333 | 29419333 |    | Her |     |
| 20 | 29714923 | 29714923 |    | Nor |     |
| 20 | 31615010 | 31834900 |    |     | Guz |
| 20 | 31679503 | 31894246 |    |     | Nel |
| 20 | 32851502 | 32851502 |    | Nor |     |
| 20 | 33048635 | 33048635 |    | Lim |     |
| 20 | 33327920 | 33327920 |    | Ang |     |
| 20 | 33702432 | 33702432 |    | Lim |     |
| 20 | 34637707 | 34637707 |    | Ang |     |
| 20 | 34637707 | 34637707 |    | Jer |     |
| 20 | 35765175 | 35765175 |    | Ang |     |
| 20 | 36485236 | 36485236 |    | Jer |     |
| 20 | 37699755 | 37699755 |    | Jer |     |
| 20 | 38584191 | 38584191 |    | Gue |     |
| 20 | 38688854 | 38688854 |    | Her |     |
| 20 | 39997182 | 39997182 |    | Jer |     |
| 20 | 40829443 | 40829443 |    | Her |     |
| 20 | 41664409 | 41664409 |    | Nor |     |
| 20 | 43351945 | 43351945 |    | Her |     |
| 20 | 43545648 | 43545648 |    | Ang |     |
| 20 | 43976492 | 43976492 |    | Bro |     |
| 20 | 47345125 | 47345125 |    | Lim |     |
| 20 | 47561347 | 47561347 |    | Lim |     |
| 20 | 48282061 | 48282061 |    | Gue |     |
| 20 | 49045314 | 49045314 |    | Nor |     |
| 20 | 49421139 | 49421139 |    | Hol |     |
| 20 | 49754059 | 50263448 |    |     | Guz |
| 20 | 49948360 | 49948360 |    | Hol |     |
| 20 | 49978524 | 50577363 |    |     | Nel |
| 20 | 50609613 | 50609613 |    | Hol |     |
| 20 | 50685586 | 50754373 |    |     | Nel |
| 20 | 50757998 | 50757998 |    | Lim |     |

|    |          |          |    |     |
|----|----------|----------|----|-----|
| 20 | 51095242 | 51095242 |    | Bro |
| 20 | 55369918 | 55369918 |    | Ang |
| 20 | 55994732 | 55994732 |    | Her |
| 20 | 56086137 | 56086137 |    | Lim |
| 20 | 56375940 | 56375940 |    | Ang |
| 20 | 56580787 | 56580787 |    | Lim |
| 20 | 57172737 | 57172737 |    | Jer |
| 20 | 57569177 | 57569177 |    | Ang |
| 20 | 58455297 | 58455297 |    | Hol |
| 20 | 58491204 | 58491204 |    | Her |
| 20 | 58741188 | 58741188 |    | Her |
| 20 | 58878031 | 58878031 |    | Nor |
| 20 | 59095135 | 59095135 |    | Bro |
| 20 | 59547361 | 59547361 |    | Gue |
| 20 | 61703362 | 61703362 |    | Nor |
| 20 | 62629282 | 62629282 |    | Gue |
| 20 | 63302487 | 63302487 |    | Nor |
| 20 | 65891632 | 65891632 |    | Hol |
| 20 | 65891632 | 65891632 |    | Jer |
| 20 | 66375195 | 66375195 |    | Nor |
| 20 | 67161518 | 67161518 |    | Jer |
| 20 | 67455096 | 67455096 |    | Bro |
| 20 | 69180337 | 69180337 |    | Lim |
| 20 | 69538476 | 69538476 |    | Bro |
| 20 | 70562140 | 70562140 |    | Gue |
| 20 | 70849409 | 70849409 |    | Gue |
| 20 | 71069702 | 71069702 |    | Jer |
| 20 | 71629018 | 71967622 | ZT |     |
| 21 | 83766    | 83766    | ZT |     |
| 21 | 302276   | 302276   | ZT |     |
| 21 | 410363   | 410363   | ZT |     |
| 21 | 560942   | 560942   | ZT |     |
| 21 | 729486   | 898385   | ZT |     |
| 21 | 774574   | 774574   |    | Gue |
| 21 | 1058688  | 1058688  | ZT |     |
| 21 | 1264130  | 1264130  | ZT |     |
| 21 | 1780745  | 1780745  | ZT |     |
| 21 | 2135292  | 2216087  | ZT |     |
| 21 | 2329730  | 2416432  | ZT |     |
| 21 | 3178241  | 3178241  |    | Hol |
| 21 | 3653561  | 3653561  |    | Her |
| 21 | 4489850  | 4489850  |    | Gue |
| 21 | 4802612  | 4802612  |    | Lim |
| 21 | 5806951  | 5806951  |    | Hol |
| 21 | 6034317  | 6034317  |    | Ang |
| 21 | 7136870  | 7136870  |    | Lim |
| 21 | 9315185  | 9315185  |    | Bro |
| 21 | 9688958  | 9688958  |    | Gue |

|    |          |          |    |     |     |
|----|----------|----------|----|-----|-----|
| 21 | 10328625 | 10328625 |    | Bro |     |
| 21 | 10843245 | 10843245 |    | Ang |     |
| 21 | 11018691 | 11018691 |    | Lim |     |
| 21 | 11285775 | 11285775 |    | Ang |     |
| 21 | 11715137 | 11715137 |    | Nor |     |
| 21 | 11996254 | 11996254 |    | Lim |     |
| 21 | 12173251 | 12173251 |    | Ang |     |
| 21 | 12634264 | 12634264 |    | Gue |     |
| 21 | 12767093 | 12767093 |    | Jer |     |
| 21 | 13630516 | 13630516 |    | Jer |     |
| 21 | 13775692 | 13775692 |    | Gue |     |
| 21 | 14407345 | 14407345 |    | Hol |     |
| 21 | 14474236 | 14474236 |    | Lim |     |
| 21 | 15079273 | 15079273 |    | Lim |     |
| 21 | 15414028 | 15414028 |    | Her |     |
| 21 | 15581199 | 15581199 |    | Lim |     |
| 21 | 15881556 | 15881556 |    | Nor |     |
| 21 | 16785248 | 16785248 |    | Ang |     |
| 21 | 17140806 | 17140806 |    | Bro |     |
| 21 | 17224297 | 17224297 |    | Ang |     |
| 21 | 17702229 | 17702229 |    | Jer |     |
| 21 | 19080172 | 19080172 |    | Bro |     |
| 21 | 19134133 | 19134133 |    | Jer |     |
| 21 | 19221246 | 19221246 |    | Ang |     |
| 21 | 19858774 | 19858774 |    | Her |     |
| 21 | 20604446 | 20749275 |    |     | Nel |
| 21 | 20669309 | 20669309 |    | Lim |     |
| 21 | 21407592 | 21407592 |    | Nor |     |
| 21 | 21460863 | 21460863 |    | Bro |     |
| 21 | 25775845 | 25775845 |    | Bro |     |
| 21 | 25858249 | 25858249 |    | Hol |     |
| 21 | 27632190 | 27632190 |    | Lim |     |
| 21 | 28346209 | 28346209 |    | Nor |     |
| 21 | 29966640 | 29966640 |    | Her |     |
| 21 | 30436035 | 30436035 |    | Nor |     |
| 21 | 30990428 | 30990428 |    | Jer |     |
| 21 | 31681776 | 33273658 | ZT |     |     |
| 21 | 32174987 | 32174987 |    | Her |     |
| 21 | 33719179 | 33719179 |    | Jer |     |
| 21 | 34995078 | 34995078 |    | Her |     |
| 21 | 35336480 | 35336480 |    | Her |     |
| 21 | 35786021 | 35786021 |    | Lim |     |
| 21 | 35940053 | 35940053 |    | Nor |     |
| 21 | 36602306 | 36602306 |    | Her |     |
| 21 | 36907183 | 36907183 |    | Jer |     |
| 21 | 37024330 | 37024330 |    | Ang |     |
| 21 | 38233793 | 38233793 |    | Hol |     |
| 21 | 38281466 | 38281466 |    | Nor |     |

|    |          |          |    |     |     |
|----|----------|----------|----|-----|-----|
| 21 | 38446915 | 38446915 |    | Bro |     |
| 21 | 39721245 | 39721245 |    | Nor |     |
| 21 | 41402002 | 42458641 |    |     | Gir |
| 21 | 41676419 | 41676419 |    | Ang |     |
| 21 | 42253894 | 42253894 |    | Bro |     |
| 21 | 42671492 | 42671492 |    | Her |     |
| 21 | 43716780 | 43716780 |    | Bro |     |
| 21 | 43835814 | 43835814 |    | Bro |     |
| 21 | 44055266 | 44055266 |    | Gue |     |
| 21 | 44190088 | 44190088 |    | Ang |     |
| 21 | 44310760 | 44310760 |    | Gue |     |
| 21 | 45435950 | 45435950 |    | Bro |     |
| 21 | 45793883 | 45979589 | ZT |     |     |
| 21 | 47785165 | 47854533 |    |     | Nel |
| 21 | 48674506 | 48674506 |    | Lim |     |
| 21 | 48834422 | 48834422 |    | Nor |     |
| 21 | 51263827 | 51263827 |    | Jer |     |
| 21 | 51632410 | 51632410 |    | Jer |     |
| 21 | 52092528 | 52092528 |    | Nor |     |
| 21 | 52286546 | 52286546 |    | Jer |     |
| 21 | 52338607 | 52338607 |    | Hol |     |
| 21 | 52524822 | 52524822 |    | Jer |     |
| 21 | 52938578 | 52938578 |    | Her |     |
| 21 | 53153813 | 53153813 |    | Gue |     |
| 21 | 53324291 | 53324291 |    | Gue |     |
| 21 | 54540263 | 54540263 |    | Bro |     |
| 21 | 54600298 | 54600298 |    | Lim |     |
| 21 | 55636264 | 55636264 |    | Nor |     |
| 21 | 56136037 | 56136037 |    | Ang |     |
| 21 | 56634361 | 56634361 |    | Her |     |
| 21 | 57365818 | 57365818 |    | Nor |     |
| 21 | 57657495 | 57657495 |    | Ang |     |
| 21 | 57791376 | 57791376 |    | Hol |     |
| 21 | 57791376 | 57791376 |    | Jer |     |
| 21 | 59091888 | 59091888 |    | Bro |     |
| 21 | 59091888 | 59091888 |    | Hol |     |
| 21 | 59380074 | 59380074 |    | Lim |     |
| 21 | 59679183 | 59679183 |    | Jer |     |
| 21 | 61068120 | 61068120 |    | Ang |     |
| 21 | 63646469 | 63646469 |    | Jer |     |
| 21 | 64139734 | 64139734 |    | Ang |     |
| 21 | 64216060 | 64216060 |    | Gue |     |
| 21 | 64295557 | 64295557 |    | Ang |     |
| 21 | 64366520 | 64366520 |    | Nor |     |
| 21 | 64788279 | 64788279 |    | Ang |     |
| 21 | 65151031 | 65151031 |    | Jer |     |
| 21 | 66893391 | 66893391 |    | Bro |     |
| 21 | 68314240 | 68314240 |    | Gue |     |

|    |          |          |    |     |     |
|----|----------|----------|----|-----|-----|
| 21 | 68349152 | 68943249 | ZT |     |     |
| 21 | 68782355 | 68782355 |    | Ang |     |
| 21 | 69171066 | 69171066 |    | Hol |     |
| 21 | 69505292 | 69505292 |    | Her |     |
| 21 | 69651875 | 69651875 |    | Jer |     |
| 21 | 70202199 | 70401009 |    |     | Nel |
| 21 | 70228643 | 70228643 |    | Her |     |
| 21 | 70268849 | 70268849 |    | Jer |     |
| 21 | 70384755 | 70384755 |    | Bro |     |
| 21 | 70566220 | 70566220 |    | Hol |     |
| 21 | 71237182 | 71237182 |    | Jer |     |
| 21 | 71464920 | 71464920 |    | Ang |     |
| 22 | 223875   | 223875   |    | Her |     |
| 22 | 1634108  | 1634108  |    | Jer |     |
| 22 | 2922700  | 2922700  |    | Gue |     |
| 22 | 3215464  | 3215464  |    | Gue |     |
| 22 | 4514702  | 4514702  |    | Nor |     |
| 22 | 4763900  | 4763900  |    | Her |     |
| 22 | 5004055  | 5004055  |    | Her |     |
| 22 | 5144693  | 5144693  |    | Ang |     |
| 22 | 5253524  | 5253524  |    | Lim |     |
| 22 | 8687590  | 8687590  |    | Gue |     |
| 22 | 9064466  | 9064466  |    | Nor |     |
| 22 | 9825898  | 9825898  |    | Lim |     |
| 22 | 10714182 | 10714182 |    | Her |     |
| 22 | 12034774 | 12034774 |    | Gue |     |
| 22 | 14046942 | 14046942 |    | Gue |     |
| 22 | 14139516 | 14139516 |    | Jer |     |
| 22 | 14991411 | 14991411 |    | Hol |     |
| 22 | 15281286 | 15330491 |    |     | Nel |
| 22 | 15476132 | 15476132 |    |     | Gir |
| 22 | 15476132 | 15476132 |    |     | Nel |
| 22 | 15589177 | 15924030 |    |     | Gir |
| 22 | 15589177 | 15924030 |    |     | Nel |
| 22 | 16739072 | 16739072 |    | Her |     |
| 22 | 16739072 | 16739072 |    | Hol |     |
| 22 | 17380447 | 17629960 |    |     | Nel |
| 22 | 17734414 | 17790781 |    |     | Nel |
| 22 | 18748905 | 18748905 |    | Bro |     |
| 22 | 18778517 | 18778517 |    | Ang |     |
| 22 | 18778517 | 18778517 |    | Jer |     |
| 22 | 18978658 | 18978658 |    | Ang |     |
| 22 | 19575681 | 19575681 |    | Jer |     |
| 22 | 19773432 | 19773432 |    | Nor |     |
| 22 | 21121244 | 21121244 |    | Nor |     |
| 22 | 21788372 | 21788372 |    | Her |     |
| 22 | 22869809 | 22869809 |    | Nor |     |
| 22 | 22986987 | 22986987 |    | Hol |     |



|    |          |          |     |     |
|----|----------|----------|-----|-----|
| 22 | 23186972 | 23186972 | Bro |     |
| 22 | 24389805 | 24389805 | Hol |     |
| 22 | 24938846 | 24938846 | Her |     |
| 22 | 25228823 | 25228823 | Her |     |
| 22 | 26157144 | 26157144 | Nor |     |
| 22 | 26919242 | 26919242 | Gue |     |
| 22 | 27121386 | 27121386 | Ang |     |
| 22 | 27417822 | 27417822 | Gue |     |
| 22 | 27503111 | 27503111 | Ang |     |
| 22 | 27503111 | 27503111 | Hol |     |
| 22 | 28626857 | 28626857 | Jer |     |
| 22 | 29096738 | 29096738 | Nor |     |
| 22 | 29802653 | 29802653 | Her |     |
| 22 | 32231307 | 32231307 | Hol |     |
| 22 | 32886762 | 32886762 | Ang |     |
| 22 | 33098772 | 33098772 | Her |     |
| 22 | 33382808 | 33382808 | Lim |     |
| 22 | 33437808 | 33437808 | Nor |     |
| 22 | 33956188 | 33956188 | Jer |     |
| 22 | 34113952 | 34113952 | Hol |     |
| 22 | 34954193 | 34954193 | Lim |     |
| 22 | 35363041 | 35363041 | Gue |     |
| 22 | 36110577 | 36110577 | Lim |     |
| 22 | 36631130 | 36631130 | Lim |     |
| 22 | 36804226 | 36804226 | Her |     |
| 22 | 37615930 | 37615930 | Her |     |
| 22 | 37739457 | 37739457 | Bro |     |
| 22 | 38544707 | 38544707 | Bro |     |
| 22 | 39116221 | 39116221 | Bro |     |
| 22 | 39448055 | 39448055 | Hol |     |
| 22 | 39579899 | 39579899 | Jer |     |
| 22 | 41276173 | 41276173 | Ang |     |
| 22 | 41990501 | 41990501 | Hol |     |
| 22 | 43019540 | 43019540 | Ang |     |
| 22 | 43104089 | 43104089 | Lim |     |
| 22 | 43194827 | 43194827 | Her |     |
| 22 | 44489267 | 44945838 |     | Gir |
| 22 | 45047902 | 45381866 |     | Gir |
| 22 | 45513779 | 45513779 |     | Gir |
| 22 | 45548761 | 45548761 | Her |     |
| 22 | 45618606 | 45670270 |     | Gir |
| 22 | 45795690 | 45795690 |     | Gir |
| 22 | 45903075 | 45903075 |     | Gir |
| 22 | 46184881 | 46184881 | Bro |     |
| 22 | 46885785 | 46885785 | Jer |     |
| 22 | 47134013 | 47134013 | Ang |     |
| 22 | 48866088 | 48943916 |     | Gir |
| 22 | 49058093 | 49058093 |     | Gir |

|    |          |          |     |     |
|----|----------|----------|-----|-----|
| 22 | 49169752 | 49376919 |     | Gir |
| 22 | 49228279 | 49228279 | Her |     |
| 22 | 49250533 | 49250533 | Bro |     |
| 22 | 50102342 | 50102342 | Hol |     |
| 22 | 52092282 | 52092282 | Ang |     |
| 22 | 52398798 | 52398798 | Lim |     |
| 22 | 52426809 | 52520543 | Hol |     |
| 22 | 53858879 | 53858879 | Gue |     |
| 22 | 54471732 | 54471732 | Hol |     |
| 22 | 54756606 | 54756606 | Nor |     |
| 22 | 55284827 | 55284827 | Her |     |
| 22 | 56358873 | 56358873 | Lim |     |
| 22 | 56543107 | 56543107 | Nor |     |
| 22 | 56650378 | 56650378 | Ang |     |
| 22 | 56650378 | 56650378 | Hol |     |
| 22 | 56677054 | 56677054 | Nor |     |
| 22 | 56719491 | 56719491 | Bro |     |
| 22 | 56901581 | 56901581 | Jer |     |
| 22 | 57284409 | 57284409 | Nor |     |
| 22 | 59676713 | 59676713 | Lim |     |
| 22 | 61340279 | 61340279 | Lim |     |
| 23 | 1722267  | 1722267  | Nor |     |
| 23 | 3130810  | 3130810  | Nor |     |
| 23 | 6568421  | 6568421  | Gue |     |
| 23 | 6604188  | 6604188  | Hol |     |
| 23 | 6901457  | 6958671  | Ang |     |
| 23 | 7122656  | 7122656  | Gue |     |
| 23 | 7418519  | 7418519  | Her |     |
| 23 | 7469550  | 7563884  |     | Guz |
| 23 | 8515946  | 8515946  | Gue |     |
| 23 | 9240908  | 9240908  | Bro |     |
| 23 | 9408634  | 9408634  | Lim |     |
| 23 | 9553885  | 9553885  | Bro |     |
| 23 | 9705388  | 9705388  | Lim |     |
| 23 | 10866245 | 10866245 | Gue |     |
| 23 | 11254502 | 11254502 | Gue |     |
| 23 | 12024909 | 12024909 | Ang |     |
| 23 | 12102265 | 12102265 | Lim |     |
| 23 | 12257262 | 12257262 | Hol |     |
| 23 | 12449291 | 12449291 | Nor |     |
| 23 | 12569920 | 12569920 | Lim |     |
| 23 | 15061292 | 15061292 | Nor |     |
| 23 | 15686158 | 15686158 | Lim |     |
| 23 | 16038896 | 16038896 | Jer |     |
| 23 | 17081775 | 17081775 | Bro |     |
| 23 | 17502522 | 17502522 | Ang |     |
| 23 | 17598366 | 17598366 | Lim |     |
| 23 | 19178586 | 19178586 | Lim |     |

|    |          |          |     |
|----|----------|----------|-----|
| 23 | 19290469 | 19290469 | Her |
| 23 | 19712427 | 19712427 | Jer |
| 23 | 19801163 | 19801163 | Ang |
| 23 | 20217537 | 20217537 | Hol |
| 23 | 21047788 | 21047788 | Hol |
| 23 | 21375181 | 21375181 | Her |
| 23 | 23388685 | 23388685 | Hol |
| 23 | 23557329 | 23557329 | Her |
| 23 | 23770678 | 23770678 | Hol |
| 23 | 24210610 | 24210610 | Hol |
| 23 | 25119525 | 25119525 | Her |
| 23 | 25208222 | 25208222 | Ang |
| 23 | 27003561 | 27003561 | Hol |
| 23 | 28382993 | 28382993 | Nor |
| 23 | 28568611 | 28568611 | Jer |
| 23 | 28638238 | 28638238 | Ang |
| 23 | 29393009 | 29393009 | Bro |
| 23 | 29481801 | 29481801 | Hol |
| 23 | 29887010 | 29887010 | Bro |
| 23 | 30163726 | 30163726 | Nor |
| 23 | 32374089 | 32374089 | Bro |
| 23 | 32805879 | 32805879 | Ang |
| 23 | 33116927 | 33116927 | Her |
| 23 | 33308775 | 33389104 | Nor |
| 23 | 35844276 | 35844276 | Lim |
| 23 | 36005120 | 36005120 | Lim |
| 23 | 36873947 | 36873947 | Ang |
| 23 | 37621058 | 37621058 | Gue |
| 23 | 38108739 | 38137505 | Jer |
| 23 | 39009221 | 39009221 | Lim |
| 23 | 39236560 | 39236560 | Nor |
| 23 | 39416740 | 39416740 | Bro |
| 23 | 39416740 | 39416740 | Lim |
| 23 | 41431432 | 41431432 | Hol |
| 23 | 42675687 | 42675687 | Ang |
| 23 | 42675687 | 42675687 | Gue |
| 23 | 43348970 | 43348970 | Ang |
| 23 | 44493427 | 44493427 | Bro |
| 23 | 44493427 | 44493427 | Lim |
| 23 | 46147244 | 46147244 | Bro |
| 23 | 49219258 | 49219258 | Gue |
| 23 | 49257068 | 49257068 | Hol |
| 23 | 49766555 | 49766555 | Ang |
| 23 | 49766555 | 49766555 | Gue |
| 23 | 49936797 | 49936797 | Bro |
| 23 | 50696236 | 50696236 | Jer |
| 23 | 51482321 | 51482321 | Her |
| 23 | 52113879 | 52113879 | Lim |

|    |          |          |     |
|----|----------|----------|-----|
| 24 | 595437   | 595437   | Ang |
| 24 | 1931077  | 1931077  | Her |
| 24 | 1931077  | 1931077  | Jer |
| 24 | 3728431  | 3728431  | Her |
| 24 | 3860135  | 3940751  | Her |
| 24 | 4003577  | 4003577  | Hol |
| 24 | 4069308  | 4069308  | Bro |
| 24 | 4481598  | 4481598  | Hol |
| 24 | 4552001  | 4552001  | Nor |
| 24 | 6464111  | 6464111  | Gue |
| 24 | 6592653  | 6592653  | Lim |
| 24 | 6653759  | 6653759  | Hol |
| 24 | 6815805  | 6815805  | Gue |
| 24 | 6815805  | 6815805  | Jer |
| 24 | 7046195  | 7046195  | Hol |
| 24 | 7268842  | 7268842  | Jer |
| 24 | 7414910  | 7414910  | Bro |
| 24 | 8475964  | 8475964  | Gue |
| 24 | 9018756  | 9018756  | Her |
| 24 | 9325287  | 9325287  | Nor |
| 24 | 10184151 | 10184151 | Gue |
| 24 | 11042693 | 11042693 | Lim |
| 24 | 11671411 | 11671411 | Jer |
| 24 | 12035684 | 12035684 | Nor |
| 24 | 12109566 | 12109566 | Jer |
| 24 | 12689748 | 12689748 | Ang |
| 24 | 13980307 | 13980307 | Hol |
| 24 | 14453986 | 14453986 | Nor |
| 24 | 14550660 | 14550660 | Ang |
| 24 | 14654716 | 14654716 | Nor |
| 24 | 14955777 | 14955777 | Lim |
| 24 | 15085174 | 15085174 | Lim |
| 24 | 15157104 | 15157104 | Ang |
| 24 | 15157104 | 15157104 | Hol |
| 24 | 17781574 | 17781574 | Nor |
| 24 | 20181440 | 20181440 | Gue |
| 24 | 20328632 | 20328632 | Jer |
| 24 | 21735980 | 21735980 | Nor |
| 24 | 22959432 | 22959432 | Bro |
| 24 | 24114816 | 24452344 |     |
| 24 | 24126741 | 24126741 | Nor |
| 24 | 25268157 | 25327416 | Nor |
| 24 | 25327416 | 25327416 | Ang |
| 24 | 25475172 | 25475172 | Ang |
| 24 | 25940349 | 25940349 | Bro |
| 24 | 26180396 | 26180396 | Lim |
| 24 | 27163570 | 27163570 | Lim |
| 24 | 27850482 | 27850482 | Bro |

ZT

|    |          |          |    |     |
|----|----------|----------|----|-----|
| 24 | 28131181 | 28131181 |    | Jer |
| 24 | 28294938 | 28294938 |    | Hol |
| 24 | 29464711 | 29464711 |    | Nor |
| 24 | 29734324 | 29734324 |    | Nor |
| 24 | 30135742 | 30135742 |    | Ang |
| 24 | 30737579 | 30737579 |    | Nor |
| 24 | 31555588 | 31555588 |    | Her |
| 24 | 31869672 | 31869672 |    | Her |
| 24 | 32463032 | 32794826 |    | Cha |
| 24 | 33307670 | 33307670 |    | Bro |
| 24 | 33779670 | 33779670 |    | Lim |
| 24 | 36487225 | 36487225 |    | Lim |
| 24 | 37927189 | 37927189 |    | Lim |
| 24 | 40140343 | 40140343 |    | Bro |
| 24 | 40304952 | 40304952 |    | Lim |
| 24 | 40928928 | 40928928 |    | Jer |
| 24 | 41922106 | 41922106 |    | Gue |
| 24 | 41922106 | 41922106 |    | Nor |
| 24 | 42875547 | 42925107 | ZT |     |
| 24 | 43649003 | 43649003 |    | Lim |
| 24 | 43770409 | 43824028 |    | Her |
| 24 | 45655306 | 45655306 |    | Bro |
| 24 | 45813402 | 45837548 |    | Jer |
| 24 | 46053659 | 46053659 |    | Hol |
| 24 | 47419901 | 47419901 |    | Gue |
| 24 | 47440919 | 47440919 |    | Bro |
| 24 | 47742388 | 47742388 |    | Jer |
| 24 | 49794284 | 49794284 |    | Nor |
| 24 | 51988098 | 51988098 |    | Bro |
| 24 | 52426314 | 52426314 |    | Jer |
| 24 | 53228187 | 53228187 |    | Hol |
| 24 | 53338779 | 53338779 |    | Her |
| 24 | 53528690 | 53528690 |    | Nor |
| 24 | 55104948 | 55104948 |    | Bro |
| 24 | 55497641 | 55497641 |    | Hol |
| 24 | 57098899 | 57098899 |    | Her |
| 24 | 57341186 | 57341186 |    | Gue |
| 24 | 57764659 | 57764659 |    | Her |
| 24 | 57950814 | 57950814 |    | Nor |
| 24 | 58173824 | 58173824 |    | Gue |
| 24 | 58457858 | 58457858 |    | Bro |
| 24 | 59072755 | 59072755 |    | Nor |
| 24 | 59179876 | 59179876 |    | Her |
| 24 | 59598481 | 59598481 |    | Bro |
| 24 | 60249445 | 60249445 |    | Ang |
| 24 | 60249445 | 60249445 |    | Jer |
| 24 | 61270542 | 61270542 |    | Her |
| 24 | 61356757 | 61356757 |    | Hol |

|    |          |          |     |
|----|----------|----------|-----|
| 24 | 61931908 | 61931908 | Lim |
| 25 | 2226168  | 2226168  | Nor |
| 25 | 3267124  | 3267124  | Nor |
| 25 | 4599247  | 4599247  | Nor |
| 25 | 5196611  | 5196611  | Nor |
| 25 | 6304451  | 6304451  | Gue |
| 25 | 7084164  | 7084164  | Jer |
| 25 | 8780012  | 8780012  | Nor |
| 25 | 9056548  | 9056548  | Her |
| 25 | 9056548  | 9056548  | Hol |
| 25 | 9823462  | 9823462  | Bro |
| 25 | 11518224 | 11518224 | Nor |
| 25 | 11647827 | 11647827 | Jer |
| 25 | 12965823 | 12965823 | Nor |
| 25 | 13991913 | 13991913 | Ang |
| 25 | 13991913 | 13991913 | Gue |
| 25 | 13991913 | 13991913 | Nor |
| 25 | 14162395 | 14162395 | Gue |
| 25 | 14971307 | 14971307 | Ang |
| 25 | 15362445 | 15362445 | Nor |
| 25 | 17188592 | 17188592 | Her |
| 25 | 19599194 | 19599194 | Gue |
| 25 | 20377310 | 20377310 | Ang |
| 25 | 21179530 | 21179530 | Her |
| 25 | 21420847 | 21420847 | Nor |
| 25 | 21530729 | 21530729 | Bro |
| 25 | 21583665 | 21583665 | Gue |
| 25 | 21712001 | 21712001 | Bro |
| 25 | 23311252 | 23311252 | Nor |
| 25 | 25159449 | 25159449 | Ang |
| 25 | 26469684 | 26469684 | Gue |
| 25 | 26752172 | 26752172 | Jer |
| 25 | 28100092 | 28100092 | Bro |
| 25 | 28739966 | 28739966 | Lim |
| 25 | 28841121 | 28841121 | Bro |
| 25 | 29003225 | 29044566 | Nor |
| 25 | 30552788 | 30552788 | Ang |
| 25 | 32021837 | 32021837 | Nor |
| 25 | 33829538 | 33829538 | Ang |
| 25 | 34117267 | 34117267 | Jer |
| 25 | 35900579 | 35900579 | Lim |
| 25 | 36003554 | 36003554 | Her |
| 25 | 36003554 | 36003554 | Hol |
| 25 | 37687592 | 37687592 | Hol |
| 25 | 38007215 | 38007215 | Ang |
| 25 | 38554362 | 38554362 | Lim |
| 25 | 38794162 | 38839907 | Ang |
| 25 | 38839907 | 38839907 | Hol |

|    |          |          |     |
|----|----------|----------|-----|
| 25 | 41045423 | 41045423 | Jer |
| 25 | 42179355 | 42179355 | Jer |
| 26 | 4004822  | 4004822  | Nor |
| 26 | 4357955  | 4357955  | Jer |
| 26 | 4837610  | 4837610  | Her |
| 26 | 5186735  | 5186735  | Ang |
| 26 | 6798521  | 6798521  | Nor |
| 26 | 8573229  | 8573229  | Ang |
| 26 | 10255258 | 10255258 | Bro |
| 26 | 11847117 | 11847117 | Ang |
| 26 | 13814193 | 13814193 | Hol |
| 26 | 15896988 | 15896988 | Gue |
| 26 | 17296240 | 17296240 | Her |
| 26 | 17851349 | 17851349 | Gue |
| 26 | 17890705 | 17890705 | Her |
| 26 | 18420542 | 18420542 | Her |
| 26 | 18530826 | 18530826 | Jer |
| 26 | 19276542 | 19276542 | Jer |
| 26 | 19294094 | 19294094 | Lim |
| 26 | 19580383 | 19580383 | Bro |
| 26 | 20364907 | 20364907 | Jer |
| 26 | 21143532 | 21143532 | Gue |
| 26 | 21461562 | 21461562 | Hol |
| 26 | 22925118 | 22925118 | Ang |
| 26 | 23335919 | 23335919 | Gue |
| 26 | 23491390 | 23491390 | Nor |
| 26 | 24881049 | 24881049 | Ang |
| 26 | 25257862 | 25322990 | Lim |
| 26 | 25994062 | 25994062 | Ang |
| 26 | 26477459 | 26477459 | Bro |
| 26 | 26715647 | 26715647 | Ang |
| 26 | 27248024 | 27248024 | Her |
| 26 | 27492649 | 27492649 | Hol |
| 26 | 27874379 | 27874379 | Nor |
| 26 | 28930038 | 28930038 | Her |
| 26 | 29108559 | 29108559 | Ang |
| 26 | 29232134 | 29232134 | Nor |
| 26 | 31197625 | 31197625 | Ang |
| 26 | 32514379 | 32514379 | Jer |
| 26 | 33003665 | 33003665 | Jer |
| 26 | 33544329 | 33544329 | Ang |
| 26 | 33919440 | 33919440 | Nor |
| 26 | 34331333 | 34331333 | Bro |
| 26 | 34388222 | 34388222 | Her |
| 26 | 34388222 | 34388222 | Hol |
| 26 | 34830744 | 34830744 | Gue |
| 26 | 34979362 | 34979362 | Lim |
| 26 | 35839349 | 35839349 | Ang |

|    |          |          |     |     |
|----|----------|----------|-----|-----|
| 26 | 36370940 | 36370940 | Bro |     |
| 26 | 36696640 | 36696640 | Nor |     |
| 26 | 36970886 | 36970886 | Ang |     |
| 26 | 36970886 | 36970886 | Gue |     |
| 26 | 36970886 | 36970886 | Nor |     |
| 26 | 37599626 | 37999778 |     | Guz |
| 26 | 37865959 | 37865959 | Her |     |
| 26 | 37917187 | 38047818 |     | Nel |
| 26 | 38137742 | 38137742 | Gue |     |
| 26 | 39780004 | 39780004 | Her |     |
| 26 | 39876353 | 39876353 | Ang |     |
| 26 | 40733253 | 40733253 | Jer |     |
| 26 | 41317644 | 41317644 | Bro |     |
| 26 | 41815981 | 41815981 | Gue |     |
| 26 | 42441667 | 42441667 | Gue |     |
| 26 | 42579324 | 42579324 | Lim |     |
| 26 | 43314317 | 43314317 | Hol |     |
| 26 | 43739858 | 43739858 | Ang |     |
| 26 | 44065654 | 44065654 | Nor |     |
| 26 | 45265647 | 45265647 | Hol |     |
| 26 | 45414142 | 45414142 | Nor |     |
| 26 | 45609721 | 45609721 | Jer |     |
| 26 | 45860522 | 45860522 | Her |     |
| 26 | 46892521 | 46892521 | Her |     |
| 26 | 46962007 | 46962007 | Nor |     |
| 26 | 47147283 | 47147283 | Gue |     |
| 26 | 47868995 | 47868995 | Lim |     |
| 26 | 48634032 | 48634032 | Ang |     |
| 26 | 48678090 | 48678090 | Bro |     |
| 26 | 48946233 | 48946233 | Gue |     |
| 26 | 49102906 | 49102906 | Bro |     |
| 26 | 49464781 | 49464781 | Nor |     |
| 26 | 50504201 | 50504201 | Jer |     |
| 26 | 50641748 | 50641748 | Lim |     |
| 26 | 50874925 | 50874925 | Nor |     |
| 26 | 50957350 | 50957350 | Jer |     |
| 26 | 51552739 | 51552739 | Hol |     |
| 27 | 198019   | 198019   | Bro |     |
| 27 | 1644121  | 1644121  | Her |     |
| 27 | 2152791  | 2152791  | Nor |     |
| 27 | 2427007  | 2427007  | Nor |     |
| 27 | 2722382  | 2722382  | Hol |     |
| 27 | 2918822  | 2918822  | Bro |     |
| 27 | 3042504  | 3042504  | Gue |     |
| 27 | 4656302  | 4656302  | Bro |     |
| 27 | 5067846  | 5067846  | Bro |     |
| 27 | 5407238  | 5407238  | Gue |     |
| 27 | 6289689  | 6289689  | Ang |     |



|    |          |          |     |
|----|----------|----------|-----|
| 27 | 6289689  | 6289689  | Gue |
| 27 | 6289689  | 6289689  | Hol |
| 27 | 7809061  | 7809061  | Her |
| 27 | 8666615  | 8666615  | Her |
| 27 | 9100139  | 9100139  | Nor |
| 27 | 9498160  | 9498160  | Gue |
| 27 | 11570761 | 11570761 | Her |
| 27 | 12761372 | 12761372 | Ang |
| 27 | 14684871 | 14684871 | Bro |
| 27 | 15129280 | 15129280 | Bro |
| 27 | 15316486 | 15316486 | Gue |
| 27 | 15488427 | 15488427 | Nor |
| 27 | 16237074 | 16237074 | Nor |
| 27 | 16495466 | 16495466 | Lim |
| 27 | 16732706 | 16732706 | Her |
| 27 | 17504630 | 17504630 | Ang |
| 27 | 17504630 | 17504630 | Nor |
| 27 | 19351133 | 19351133 | Her |
| 27 | 19422656 | 19422656 | Nor |
| 27 | 20898312 | 20898312 | Nor |
| 27 | 22268519 | 22268519 | Ang |
| 27 | 22364920 | 22364920 | Her |
| 27 | 22604390 | 22604390 | Her |
| 27 | 22757505 | 22757505 | Bro |
| 27 | 22865771 | 22865771 | Jer |
| 27 | 23120365 | 23120365 | Nor |
| 27 | 23160424 | 23160424 | Lim |
| 27 | 24030500 | 24030500 | Bro |
| 27 | 24311520 | 24386563 | Hol |
| 27 | 24433603 | 24433603 | Ang |
| 27 | 25383890 | 25383890 | Her |
| 27 | 25529207 | 25529207 | Her |
| 27 | 31210394 | 31210394 | Jer |
| 27 | 31233518 | 31233518 | Lim |
| 27 | 31588911 | 31588911 | Lim |
| 27 | 32027251 | 32027251 | Lim |
| 27 | 34047531 | 34047531 | Hol |
| 27 | 35032230 | 35032230 | Her |
| 27 | 35389008 | 35389008 | Jer |
| 27 | 37223964 | 37223964 | Nor |
| 27 | 37970643 | 37970643 | Jer |
| 27 | 38593377 | 38593377 | Hol |
| 27 | 38593377 | 38593377 | Jer |
| 27 | 39076960 | 39076960 | Lim |
| 27 | 39237771 | 39237771 | Jer |
| 27 | 39761980 | 39761980 | Lim |
| 27 | 40019304 | 40019304 | Hol |
| 27 | 40144051 | 40144051 | Gue |

|    |          |          |     |     |
|----|----------|----------|-----|-----|
| 27 | 40395249 | 40395249 | Her |     |
| 27 | 40698638 | 40698638 | Gue |     |
| 27 | 40739599 | 40739599 | Hol |     |
| 27 | 41298206 | 41298206 | Gue |     |
| 27 | 41323268 | 41323268 | Hol |     |
| 27 | 42224267 | 42224267 | Lim |     |
| 27 | 42968597 | 42968597 | Gue |     |
| 27 | 43026425 | 43026425 | Bro |     |
| 27 | 43711279 | 43711279 | Her |     |
| 27 | 44056399 | 44056399 | Hol |     |
| 27 | 44130007 | 44130007 | Lim |     |
| 27 | 44518346 | 44518346 | Her |     |
| 27 | 44795496 | 44795496 | Jer |     |
| 27 | 44952306 | 44952306 | Lim |     |
| 28 | 685362   | 685362   | Gue |     |
| 28 | 1522477  | 1522477  | Ang |     |
| 28 | 2197476  | 2197476  | Gue |     |
| 28 | 2197476  | 2197476  | Nor |     |
| 28 | 3261517  | 3402458  |     | Nel |
| 28 | 3902035  | 3902035  | Hol |     |
| 28 | 5250484  | 5250484  | Jer |     |
| 28 | 6783645  | 6783645  | Lim |     |
| 28 | 6863680  | 6863680  | Her |     |
| 28 | 7439585  | 7439585  | Gue |     |
| 28 | 8080087  | 8080087  | Gue |     |
| 28 | 8354512  | 8354512  | Jer |     |
| 28 | 8395160  | 8395160  | Gue |     |
| 28 | 8590626  | 8590626  | Hol |     |
| 28 | 8671561  | 8671561  | Gue |     |
| 28 | 9657827  | 9657827  | Gue |     |
| 28 | 10527491 | 10527491 | Her |     |
| 28 | 10954154 | 10954154 | Nor |     |
| 28 | 12660161 | 12660161 | Hol |     |
| 28 | 13302247 | 13302247 | Nor |     |
| 28 | 13429871 | 13429871 | Jer |     |
| 28 | 13594431 | 13594431 | Gue |     |
| 28 | 16291445 | 16291445 | Jer |     |
| 28 | 17228071 | 17228071 | Jer |     |
| 28 | 18186248 | 18186248 | Hol |     |
| 28 | 18816874 | 18816874 | Gue |     |
| 28 | 18971778 | 18971778 | Lim |     |
| 28 | 20951400 | 20951400 | Ang |     |
| 28 | 20951400 | 20951400 | Nor |     |
| 28 | 21027360 | 21027360 | Lim |     |
| 28 | 21833628 | 21833628 | Nor |     |
| 28 | 23045649 | 23045649 | Nor |     |
| 28 | 23457159 | 23457159 | Her |     |
| 28 | 23632432 | 23632432 | Bro |     |

|    |          |          |     |     |
|----|----------|----------|-----|-----|
| 28 | 27333444 | 27333444 | Nor |     |
| 28 | 27695848 | 27695848 | Nor |     |
| 28 | 27984648 | 27984648 | Hol |     |
| 28 | 28030026 | 28030026 | Bro |     |
| 28 | 28106435 | 28106435 | Lim |     |
| 28 | 28395949 | 28395949 | Bro |     |
| 28 | 28767391 | 28767391 | Her |     |
| 28 | 29116183 | 29116183 | Lim |     |
| 28 | 29394116 | 29612623 |     | Gir |
| 28 | 29734099 | 29734099 |     | Gir |
| 28 | 30323737 | 30323737 | Bro |     |
| 28 | 30658103 | 30658103 | Her |     |
| 28 | 30830682 | 30830682 | Nor |     |
| 28 | 31084814 | 31084814 | Her |     |
| 28 | 31364396 | 31364396 | Nor |     |
| 28 | 31917001 | 31917001 | Ang |     |
| 28 | 32035385 | 32035385 | Bro |     |
| 28 | 32681073 | 32681073 | Hol |     |
| 28 | 33355851 | 33355851 | Nor |     |
| 28 | 33449126 | 33449126 | Her |     |
| 28 | 34313489 | 34313489 | Gue |     |
| 28 | 34434650 | 34434650 | Ang |     |
| 28 | 34510944 | 34510944 | Jer |     |
| 28 | 35025032 | 35025032 | Hol |     |
| 28 | 35286017 | 35286017 | Her |     |
| 28 | 36647755 | 36647755 | Hol |     |
| 28 | 36949147 | 36949147 | Bro |     |
| 28 | 37919850 | 37919850 | Hol |     |
| 28 | 38369435 | 38369435 | Lim |     |
| 28 | 38739206 | 38739206 | Jer |     |
| 28 | 39109829 | 39109829 | Lim |     |
| 28 | 39506736 | 39506736 | Nor |     |
| 28 | 40124664 | 40124664 | Gue |     |
| 28 | 40325483 | 40325483 | Bro |     |
| 28 | 40325483 | 40325483 | Jer |     |
| 28 | 40325483 | 40325483 | Lim |     |
| 28 | 40579464 | 40579464 | Nor |     |
| 28 | 40835122 | 40835122 | Gue |     |
| 28 | 40835122 | 40835122 | Jer |     |
| 28 | 40984324 | 40984324 | Lim |     |
| 28 | 41738453 | 41738453 | Gue |     |
| 28 | 43328482 | 43328482 | Gue |     |
| 28 | 43440375 | 43440375 | Gue |     |
| 28 | 43882171 | 43882171 | Nor |     |
| 28 | 44483670 | 44483670 | Jer |     |
| 28 | 44713619 | 44713619 | Hol |     |
| 28 | 45521696 | 45521696 | Her |     |
| 28 | 45701490 | 45701490 | Nor |     |

|    |          |          |     |
|----|----------|----------|-----|
| 28 | 46151137 | 46151137 | Lim |
| 29 | 2381798  | 2381798  | Her |
| 29 | 6689993  | 6689993  | Her |
| 29 | 7314334  | 7314334  | Ang |
| 29 | 7314334  | 7314334  | Nor |
| 29 | 7357191  | 7357191  | Lim |
| 29 | 7960759  | 7960759  | Bro |
| 29 | 8013686  | 8013686  | Lim |
| 29 | 8249041  | 8249041  | Her |
| 29 | 8919227  | 8919227  | Hol |
| 29 | 9496843  | 9496843  | Jer |
| 29 | 9996897  | 9996897  | Her |
| 29 | 9996897  | 9996897  | Hol |
| 29 | 10267644 | 10267644 | Ang |
| 29 | 11254870 | 11254870 | Bro |
| 29 | 12405803 | 12405803 | Her |
| 29 | 13286538 | 13286538 | Hol |
| 29 | 13388874 | 13388874 | Gue |
| 29 | 14267174 | 14267174 | Gue |
| 29 | 14777349 | 14777349 | Gue |
| 29 | 15007220 | 15007220 | Lim |
| 29 | 15389832 | 15389832 | Gue |
| 29 | 15419837 | 15419837 | Hol |
| 29 | 15604832 | 15604832 | Nor |
| 29 | 16519520 | 16519520 | Bro |
| 29 | 16563370 | 16563370 | Ang |
| 29 | 16832642 | 16832642 | Gue |
| 29 | 17470586 | 17470586 | Her |
| 29 | 19811305 | 19811305 | Her |
| 29 | 21856094 | 21856094 | Her |
| 29 | 25589023 | 25589023 | Ang |
| 29 | 26432802 | 26432802 | Gue |
| 29 | 26580551 | 26580551 | Jer |
| 29 | 27594621 | 27594621 | Ang |
| 29 | 28592323 | 28592323 | Jer |
| 29 | 28625093 | 28625093 | Ang |
| 29 | 30043204 | 30043204 | Bro |
| 29 | 30100272 | 30100272 | Jer |
| 29 | 30144517 | 30144517 | Hol |
| 29 | 31013389 | 31013389 | Jer |
| 29 | 31123926 | 31123926 | Ang |
| 29 | 31229505 | 31229505 | Gue |
| 29 | 32644310 | 32644310 | Ang |
| 29 | 33972280 | 33972280 | Her |
| 29 | 34027829 | 34027829 | Nor |
| 29 | 34432438 | 34432438 | Gue |
| 29 | 35799111 | 35799111 | Gue |
| 29 | 38767346 | 38767346 | Gue |

|    |          |          |    |     |     |
|----|----------|----------|----|-----|-----|
| 29 | 39781860 | 39781860 |    | Lim |     |
| 29 | 40558177 | 40558177 |    | Ang |     |
| 29 | 40558177 | 40558177 |    | Nor |     |
| 29 | 40823987 | 40823987 |    | Lim |     |
| 29 | 40901491 | 40901491 |    | Her |     |
| 29 | 41324292 | 41324292 |    | Hol |     |
| 29 | 43825229 | 43825229 |    | Jer |     |
| 29 | 44224205 | 44224205 |    | Ang |     |
| 29 | 44323545 | 44323545 |    | Hol |     |
| 29 | 44494117 | 44775664 |    |     | Gir |
| 29 | 45117874 | 45117874 |    | Jer |     |
| 29 | 47030125 | 47030125 |    | Jer |     |
| 29 | 48475112 | 48475112 |    | Nor |     |
| 29 | 48591282 | 48591282 |    | Jer |     |
| 29 | 48766169 | 48766169 |    | Hol |     |
| 29 | 49309125 | 49309125 |    | Nor |     |
| 29 | 50106335 | 50106335 |    | Gue |     |
| 29 | 51078181 | 51078181 |    | Nor |     |
| 29 | 51452986 | 51452986 | ZT |     |     |
