# Supplementary material for: Genomic divergence of zebu and taurine cattle identified through high-density SNP genotyping
Source: PubMed Central journal article supplement (PMC4046821; doi:10.1186/1471-2164-14-876), 2013-12-13
Supplement: 12864_2012_5571_MOESM7_ESM.pdf [file 12864_2012_5571_MOESM7_ESM.pdf]

**Supplementary table 4. Summary of candidate regions in autosomes of balancing selection detected using smoothed FST in three analyses: 1) comparing zebu-aurine animals, 2) within taurine (n = 9 breeds), and 3) within zebu (n = 3 breeds).**

The bottom 1% smoothed FST values for each breed in each analysis were considered peaks. For each analyses separately, if two breed specific peaks were less than 50Kb from each other they were joined into a single peak-region. In this table no attempt was made to join any breed specific peak-regions or to identify peak-regions in common (or overlaps) across breeds and across the different analyses.

| BTA | Start    | End      | Zebu-Taurine | Within_taurine | Within_zebu |
|-----|----------|----------|--------------|----------------|-------------|
| 1   | 2037672  | 2352532  |              | Lim            |             |
| 1   | 3579259  | 3643368  |              |                | Nel         |
| 1   | 3940733  | 4010489  |              | Jer            |             |
| 1   | 4067489  | 4067489  |              |                | Nel         |
| 1   | 4170042  | 4170042  |              |                | Nel         |
| 1   | 4295157  | 4410834  |              |                | Nel         |
| 1   | 4530391  | 4530391  |              |                | Nel         |
| 1   | 4812893  | 4918544  |              |                | Gir         |
| 1   | 6835494  | 7165460  |              | Cha            |             |
| 1   | 9521109  | 9726816  |              | Cha            |             |
| 1   | 10392995 | 10541635 |              | Jer            |             |
| 1   | 11218497 | 11441406 |              | Nor            |             |
| 1   | 12332161 | 12380238 |              | Gue            |             |
| 1   | 12488078 | 12739533 |              | Gue            |             |
| 1   | 13492766 | 13908814 |              | Nor            |             |
| 1   | 15766553 | 15921372 |              | Jer            |             |
| 1   | 17070285 | 17652453 |              | Lim            |             |
| 1   | 20921793 | 21085526 |              | Jer            |             |
| 1   | 28716153 | 28981370 |              | Lim            |             |
| 1   | 28939097 | 29393631 |              | Ang            |             |
| 1   | 34586544 | 34586544 |              |                | Guz         |
| 1   | 36710870 | 37100951 |              | Cha            |             |
| 1   | 37207407 | 37207407 |              | Cha            |             |
| 1   | 37207407 | 37271958 |              | Lim            |             |
| 1   | 39716103 | 39910369 |              | Lim            |             |
| 1   | 40014655 | 40096011 |              | Lim            |             |
| 1   | 44045405 | 44514015 |              | Lim            |             |
| 1   | 45893364 | 45942600 |              |                | Nel         |
| 1   | 46056895 | 46135864 |              |                | Nel         |
| 1   | 46258910 | 46258910 |              |                | Nel         |
| 1   | 54988164 | 55364825 |              |                | Guz         |
| 1   | 55901366 | 55998138 |              | Gue            |             |
| 1   | 58118007 | 58304127 |              | Lim            |             |
| 1   | 64338202 | 64387526 |              | Nor            |             |
| 1   | 64608435 | 65126749 |              | Ang            |             |
| 1   | 66490101 | 66701323 |              | Ang            |             |
| 1   | 66527937 | 67416313 |              |                | Nel         |
| 1   | 66659645 | 66701323 |              | Nor            |             |

|   |           |           |     |     |
|---|-----------|-----------|-----|-----|
| 1 | 66814280  | 66814280  | Ang |     |
| 1 | 67679688  | 68592048  | Cha |     |
| 1 | 68276649  | 68661496  | Ang |     |
| 1 | 69119625  | 69180180  |     | Nel |
| 1 | 70469092  | 70843771  |     | Nel |
| 1 | 70925090  | 70977963  | Nor |     |
| 1 | 76704597  | 76917631  |     | Nel |
| 1 | 82192085  | 82240344  | Cha |     |
| 1 | 83195623  | 83195623  |     | Guz |
| 1 | 83242738  | 83626527  | Bro |     |
| 1 | 83348654  | 83538104  |     | Guz |
| 1 | 83733826  | 83903856  | Bro |     |
| 1 | 84030978  | 84030978  | Bro |     |
| 1 | 84188608  | 84418399  | Bro |     |
| 1 | 87301706  | 87583573  |     | Gir |
| 1 | 87711085  | 88493112  |     | Gir |
| 1 | 88366327  | 88493112  |     | Nel |
| 1 | 88595430  | 88595430  |     | Nel |
| 1 | 89253733  | 89495325  |     | Gir |
| 1 | 90889100  | 91145158  |     | Gir |
| 1 | 91264694  | 91474650  |     | Gir |
| 1 | 91948784  | 92158374  |     | Nel |
| 1 | 92493101  | 92680870  | Cha |     |
| 1 | 92869117  | 92936159  | Cha |     |
| 1 | 95477262  | 95549663  |     | Guz |
| 1 | 96955573  | 97106632  |     | Guz |
| 1 | 98133752  | 98193221  |     | Guz |
| 1 | 102628793 | 103033809 | Lim |     |
| 1 | 104066487 | 104160954 | Cha |     |
| 1 | 105264358 | 105390377 | Jer |     |
| 1 | 105475769 | 106184789 | Hol |     |
| 1 | 106290322 | 106400046 | Hol |     |
| 1 | 106431991 | 106514910 | Her |     |
| 1 | 107854532 | 108189849 |     | Guz |
| 1 | 107854532 | 108006588 |     | Nel |
| 1 | 107881814 | 108260465 | Hol |     |
| 1 | 108260465 | 108480479 | Lim |     |
| 1 | 108428021 | 108428021 | Her |     |
| 1 | 109302787 | 109427567 | Lim |     |
| 1 | 111750865 | 111954606 | Jer |     |
| 1 | 113827584 | 113906808 | Bro |     |
| 1 | 114008939 | 114348164 | Bro |     |
| 1 | 114008939 | 114263777 |     | Gir |
| 1 | 115427475 | 115793142 | Hol |     |
| 1 | 118826155 | 119158995 |     | Nel |
| 1 | 118959520 | 119196385 |     | Guz |
| 1 | 123033120 | 123033120 | Gue |     |
| 1 | 123148441 | 123223792 | Gue |     |

|   |           |           |     |     |
|---|-----------|-----------|-----|-----|
| 1 | 126561061 | 126679598 | Her |     |
| 1 | 126994435 | 127206157 | Nor |     |
| 1 | 127429635 | 127905071 | Bro |     |
| 1 | 127635326 | 127769440 | Lim |     |
| 1 | 132612093 | 132735977 | Nor |     |
| 1 | 139519066 | 139680260 | Gue |     |
| 1 | 139823433 | 140009270 | Cha |     |
| 1 | 140709356 | 141032878 | Gue |     |
| 1 | 141158670 | 141158670 | Gue |     |
| 1 | 141272688 | 141371753 | Gue |     |
| 1 | 141850538 | 142110106 |     | Gir |
| 1 | 142006688 | 142284552 | Cha |     |
| 1 | 144306464 | 144429157 | Bro |     |
| 1 | 144487373 | 144682686 |     | Nel |
| 1 | 144639075 | 144722440 | Gue |     |
| 1 | 146464733 | 146464733 | Jer |     |
| 1 | 147262537 | 147314194 |     | Guz |
| 1 | 149995600 | 149995600 | Cha |     |
| 1 | 150187027 | 150246003 | Nor |     |
| 2 | 1039834   | 1069251   | Nor |     |
| 2 | 1069251   | 1120956   | Her |     |
| 2 | 4637012   | 5149149   | Jer |     |
| 2 | 11814955  | 11856020  | Her |     |
| 2 | 11884273  | 12071031  |     | Nel |
| 2 | 24285533  | 24350788  | Nor |     |
| 2 | 26357124  | 26357124  | Ang |     |
| 2 | 31195297  | 31528039  | Lim |     |
| 2 | 34673859  | 34919470  | Jer |     |
| 2 | 35144463  | 35374515  |     | Nel |
| 2 | 35472241  | 35880237  | Lim |     |
| 2 | 36841417  | 37176489  | Her |     |
| 2 | 37803158  | 37803158  | Hol |     |
| 2 | 37922119  | 37922119  | Hol |     |
| 2 | 40386188  | 40664544  | Hol |     |
| 2 | 40987473  | 41125455  | Bro |     |
| 2 | 41228198  | 41228198  | Bro |     |
| 2 | 42862918  | 43458347  | Bro |     |
| 2 | 42929914  | 43367798  | Ang |     |
| 2 | 43220655  | 43669764  | Nor |     |
| 2 | 44242869  | 44301656  | Gue |     |
| 2 | 47484517  | 47723309  | Lim |     |
| 2 | 56427965  | 56594393  | Ang |     |
| 2 | 56796392  | 56818605  | Hol |     |
| 2 | 60617679  | 60977906  | Ang |     |
| 2 | 61876359  | 62211779  |     | Guz |
| 2 | 62040805  | 62093948  | Jer |     |
| 2 | 62957859  | 63162563  |     | Guz |
| 2 | 65236181  | 65695312  | Ang |     |

|   |           |           |     |     |
|---|-----------|-----------|-----|-----|
| 2 | 68969639  | 69770834  | Gue |     |
| 2 | 69893248  | 70902064  | Gue |     |
| 2 | 69947393  | 69947393  | Ang |     |
| 2 | 71185300  | 72088161  | Nor |     |
| 2 | 71819182  | 72154737  | Jer |     |
| 2 | 71821926  | 72461152  |     | Nel |
| 2 | 73136334  | 73295397  | Lim |     |
| 2 | 73136334  | 73235821  | Nor |     |
| 2 | 73404896  | 73404896  | Lim |     |
| 2 | 74005555  | 74202772  | Lim |     |
| 2 | 74270829  | 74708745  | Gue |     |
| 2 | 74565316  | 74708745  | Lim |     |
| 2 | 76794789  | 76794789  | Jer |     |
| 2 | 76872648  | 77063880  |     | Nel |
| 2 | 76970656  | 76970656  | Nor |     |
| 2 | 77063880  | 77246194  |     | Gir |
| 2 | 77175718  | 77175718  | Jer |     |
| 2 | 77423199  | 78007011  | Jer |     |
| 2 | 78161232  | 78161232  | Her |     |
| 2 | 78556325  | 78556325  | Jer |     |
| 2 | 79413457  | 79522297  | Ang |     |
| 2 | 79413457  | 79490369  | Jer |     |
| 2 | 79633085  | 79633085  | Ang |     |
| 2 | 79738886  | 80298164  | Ang |     |
| 2 | 79738886  | 79901540  | Jer |     |
| 2 | 80603725  | 80708386  | Jer |     |
| 2 | 81335062  | 81461797  | Jer |     |
| 2 | 81645767  | 81721478  | Ang |     |
| 2 | 81844987  | 82840808  | Ang |     |
| 2 | 82928052  | 83595986  | Nor |     |
| 2 | 83712390  | 84143473  | Nor |     |
| 2 | 84023099  | 84093028  | Gue |     |
| 2 | 84270003  | 84348194  | Nor |     |
| 2 | 90574020  | 90669806  | Jer |     |
| 2 | 99405576  | 99661871  | Gue |     |
| 2 | 100342719 | 100342719 | Gue |     |
| 2 | 102318489 | 102782167 | Gue |     |
| 2 | 113242573 | 113310877 | Hol |     |
| 2 | 125375690 | 125375690 | Nor |     |
| 2 | 125489097 | 125890340 | Nor |     |
| 2 | 130716998 | 130865106 | Bro |     |
| 3 | 4368671   | 4487413   | Cha |     |
| 3 | 4588145   | 4615611   | Cha |     |
| 3 | 6217109   | 6276686   | Cha |     |
| 3 | 7184450   | 7266768   | Cha |     |
| 3 | 8984749   | 9094992   | Gue |     |
| 3 | 9221939   | 9281831   | Gue |     |
| 3 | 9388253   | 9478846   | Gue |     |

|   |          |          |     |     |
|---|----------|----------|-----|-----|
| 3 | 10641889 | 11142773 | Her |     |
| 3 | 11557412 | 11930318 |     | Gir |
| 3 | 12159772 | 12159772 |     | Gir |
| 3 | 12275673 | 12516312 |     | Gir |
| 3 | 12323598 | 12708985 | Gue |     |
| 3 | 12377695 | 12653440 | Her |     |
| 3 | 12635306 | 12915639 |     | Gir |
| 3 | 14014602 | 14288655 | Gue |     |
| 3 | 14288655 | 14501847 | Her |     |
| 3 | 14853592 | 15441760 | Gue |     |
| 3 | 14983356 | 15548277 | Bro |     |
| 3 | 15076675 | 15265624 | Nor |     |
| 3 | 15218694 | 15410466 | Her |     |
| 3 | 15410466 | 15660317 | Cha |     |
| 3 | 19308579 | 19385035 |     | Gir |
| 3 | 19328506 | 19646785 | Bro |     |
| 3 | 19396423 | 19704580 | Lim |     |
| 3 | 19522686 | 19522686 |     | Gir |
| 3 | 28856107 | 28998296 | Hol |     |
| 3 | 29104477 | 29104477 | Hol |     |
| 3 | 30040048 | 30040048 | Ang |     |
| 3 | 30040048 | 30216573 | Jer |     |
| 3 | 30309723 | 30331825 | Hol |     |
| 3 | 34300912 | 34300912 | Ang |     |
| 3 | 34424540 | 34512042 | Ang |     |
| 3 | 35521695 | 35785053 | Bro |     |
| 3 | 37800799 | 37800799 | Ang |     |
| 3 | 37904788 | 38097870 | Ang |     |
| 3 | 41566030 | 41640521 | Hol |     |
| 3 | 43262046 | 43687651 | Lim |     |
| 3 | 43528755 | 43562824 | Gue |     |
| 3 | 57099499 | 57200004 | Cha |     |
| 3 | 57407830 | 57477853 | Lim |     |
| 3 | 61486775 | 61955379 |     | Guz |
| 3 | 65981531 | 66533414 |     | Guz |
| 3 | 66089009 | 66533414 |     | Gir |
| 3 | 66650037 | 66901916 |     | Gir |
| 3 | 66650037 | 66901916 |     | Guz |
| 3 | 67003456 | 67419002 |     | Gir |
| 3 | 67003456 | 67367498 |     | Guz |
| 3 | 67216388 | 67447860 | Hol |     |
| 3 | 67338055 | 67427479 | Gue |     |
| 3 | 67478877 | 67533434 | Her |     |
| 3 | 75170259 | 75329394 |     | Nel |
| 3 | 75397165 | 75718184 |     | Gir |
| 3 | 75567932 | 75617933 | Lim |     |
| 3 | 76045719 | 76262584 |     | Nel |
| 3 | 76447030 | 76795293 | Jer |     |

|   |           |           |     |     |
|---|-----------|-----------|-----|-----|
| 3 | 77129465  | 77727223  | Jer |     |
| 3 | 78151023  | 78213770  | Jer |     |
| 3 | 79246696  | 79379819  | Nor |     |
| 3 | 90342708  | 90417369  | Hol |     |
| 3 | 93288452  | 93375163  | Lim |     |
| 3 | 94181287  | 94583211  | Lim |     |
| 3 | 96197501  | 96250668  | Jer |     |
| 3 | 99126486  | 99718312  | Her |     |
| 3 | 99823337  | 99823337  | Her |     |
| 3 | 109332540 | 109692820 | Jer |     |
| 3 | 110015096 | 110265914 | Gue |     |
| 3 | 110538634 | 110636957 | Bro |     |
| 3 | 115439388 | 115523479 |     | Nel |
| 3 | 115491592 | 115587197 | Ang |     |
| 3 | 117549230 | 117580949 | Ang |     |
| 3 | 119789440 | 119827826 | Ang |     |
| 4 | 2548604   | 2666815   |     | Nel |
| 4 | 5157612   | 5477058   |     | Guz |
| 4 | 5586084   | 5586084   |     | Guz |
| 4 | 6248795   | 6578847   |     | Gir |
| 4 | 9417524   | 9505717   |     | Nel |
| 4 | 9612574   | 9779560   |     | Nel |
| 4 | 12045878  | 12496515  |     | Nel |
| 4 | 29081138  | 29081138  | Jer |     |
| 4 | 29273904  | 29273904  |     | Gir |
| 4 | 29420798  | 29673705  |     | Gir |
| 4 | 29791365  | 30139557  |     | Gir |
| 4 | 29980543  | 30032467  | Jer |     |
| 4 | 30252603  | 30252603  |     | Gir |
| 4 | 31742053  | 31901772  |     | Nel |
| 4 | 34909242  | 35142339  | Cha |     |
| 4 | 35335600  | 36012109  | Cha |     |
| 4 | 38538545  | 38538545  | Her |     |
| 4 | 41316989  | 41456792  |     | Guz |
| 4 | 41569498  | 41603469  |     | Guz |
| 4 | 45762129  | 46154398  | Bro |     |
| 4 | 46053489  | 46175467  |     | Guz |
| 4 | 46053489  | 46175467  |     | Nel |
| 4 | 47198262  | 47277331  |     | Guz |
| 4 | 48310001  | 48414247  |     | Guz |
| 4 | 48523422  | 48656607  |     | Guz |
| 4 | 48585020  | 48615363  | Cha |     |
| 4 | 48718180  | 48718180  | Cha |     |
| 4 | 48767482  | 48767482  |     | Guz |
| 4 | 48839792  | 48879377  | Cha |     |
| 4 | 52649605  | 52954149  | Jer |     |
| 4 | 52791137  | 53013177  |     | Guz |
| 4 | 57573757  | 57573757  | Her |     |

|   |           |           |     |     |
|---|-----------|-----------|-----|-----|
| 4 | 57851919  | 57978926  |     | Nel |
| 4 | 64098755  | 64296439  |     | Gir |
| 4 | 64403984  | 64761593  |     | Gir |
| 4 | 64761593  | 64761593  |     | Nel |
| 4 | 64879673  | 64969611  |     | Nel |
| 4 | 68527851  | 68527851  | Bro |     |
| 4 | 68750153  | 68832680  | Hol |     |
| 4 | 70147152  | 70262792  | Bro |     |
| 4 | 70262792  | 70395024  | Gue |     |
| 4 | 70469620  | 70664476  | Hol |     |
| 4 | 70508946  | 70656523  |     | Gir |
| 4 | 70632396  | 70717821  | Lim |     |
| 4 | 72130878  | 72344551  |     | Nel |
| 4 | 72584147  | 72814820  |     | Guz |
| 4 | 72774164  | 72948376  |     | Nel |
| 4 | 72990437  | 73112667  | Gue |     |
| 4 | 73222260  | 73302220  | Gue |     |
| 4 | 83316121  | 83802875  |     | Guz |
| 4 | 83929999  | 84051842  |     | Guz |
| 4 | 84164532  | 84164532  |     | Guz |
| 4 | 84307106  | 84307106  |     | Guz |
| 4 | 84418065  | 84418065  |     | Guz |
| 4 | 84527948  | 85133731  |     | Guz |
| 4 | 85992357  | 86021183  | Cha |     |
| 4 | 91208071  | 91208071  | Lim |     |
| 4 | 92242777  | 92522721  | Her |     |
| 4 | 92672093  | 93058899  |     | Guz |
| 4 | 92910098  | 93370273  |     | Gir |
| 4 | 93058899  | 93078720  |     | Nel |
| 4 | 93475999  | 93475999  |     | Gir |
| 4 | 94646302  | 94646302  |     | Guz |
| 4 | 98427600  | 98552147  |     | Nel |
| 4 | 102427721 | 102513433 |     | Gir |
| 4 | 104791437 | 105260800 | Hol |     |
| 4 | 105204914 | 105448770 | Lim |     |
| 4 | 105481885 | 105532313 | Her |     |
| 4 | 105905928 | 106043564 | Jer |     |
| 4 | 106564443 | 106633751 | Hol |     |
| 4 | 106824046 | 106824046 | Hol |     |
| 4 | 108733336 | 108872954 |     | Guz |
| 4 | 108835578 | 108863093 | Jer |     |
| 4 | 110295764 | 111277799 | ZT  |     |
| 4 | 111378106 | 111378106 | ZT  |     |
| 4 | 111742866 | 112562902 | ZT  |     |
| 4 | 112975792 | 113362873 | Bro |     |
| 4 | 114538317 | 114636819 | Bro |     |
| 4 | 114565961 | 115354564 | Hol |     |
| 4 | 115217092 | 115305733 |     | Nel |

|   |           |           |    |     |     |
|---|-----------|-----------|----|-----|-----|
| 4 | 116281024 | 116383880 |    |     | Nel |
| 4 | 116352975 | 116369242 |    | Nor |     |
| 4 | 116457483 | 117264852 |    | Bro |     |
| 4 | 117660545 | 118160445 |    |     | Gir |
| 4 | 118168607 | 118225601 |    | Her |     |
| 4 | 119201399 | 119291918 |    |     | Nel |
| 4 | 119475712 | 119789473 |    |     | Gir |
| 4 | 120082962 | 120437782 |    | Hol |     |
| 4 | 120082962 | 120416517 |    |     | Guz |
| 4 | 120082962 | 120581988 |    |     | Nel |
| 5 | 1562117   | 1648232   |    |     | Guz |
| 5 | 6083959   | 6315172   |    | Hol |     |
| 5 | 19457756  | 19898237  | ZT |     |     |
| 5 | 25902946  | 25953158  |    |     | Nel |
| 5 | 26714225  | 26967739  |    |     | Nel |
| 5 | 27216778  | 27401494  |    | Jer |     |
| 5 | 30395381  | 30395381  |    | Nor |     |
| 5 | 31825300  | 31949666  |    | Jer |     |
| 5 | 37799897  | 37866320  |    |     | Gir |
| 5 | 39196424  | 39500339  |    | Gue |     |
| 5 | 40366855  | 40637761  |    | Cha |     |
| 5 | 43060961  | 43185507  |    |     | Guz |
| 5 | 47305323  | 47433954  |    |     | Gir |
| 5 | 47587701  | 47756295  |    |     | Nel |
| 5 | 54447666  | 54494300  |    | Hol |     |
| 5 | 64506830  | 64613619  |    | Lim |     |
| 5 | 65858094  | 66035895  |    | Jer |     |
| 5 | 72979259  | 73335888  |    | Nor |     |
| 5 | 74182928  | 74288348  |    |     | Guz |
| 5 | 76719327  | 76811165  | ZT |     |     |
| 5 | 76972837  | 77207435  | ZT |     |     |
| 5 | 87507444  | 87859948  |    |     | Gir |
| 5 | 89876954  | 89876954  |    | Bro |     |
| 5 | 89994551  | 90192310  |    | Bro |     |
| 5 | 91107601  | 91403113  |    | Hol |     |
| 5 | 95306454  | 95306454  |    | Her |     |
| 5 | 95410443  | 95459836  |    | Her |     |
| 5 | 96475709  | 96764402  |    |     | Gir |
| 5 | 99198859  | 99379658  |    | Ang |     |
| 5 | 104194524 | 104233341 |    | Jer |     |
| 5 | 105477063 | 105758404 |    | Jer |     |
| 5 | 108820698 | 109069968 |    | Lim |     |
| 5 | 108820698 | 109129238 |    | Nor |     |
| 5 | 109796357 | 110046386 |    | Bro |     |
| 5 | 110258274 | 110310349 |    | Nor |     |
| 5 | 111599240 | 112093369 |    | Cha |     |
| 5 | 113491995 | 113505486 |    | Bro |     |
| 5 | 114319413 | 114526589 |    | Gue |     |



|   |           |           |    |     |     |
|---|-----------|-----------|----|-----|-----|
| 5 | 114319413 | 114430942 |    | Jer |     |
| 5 | 114430942 | 114661464 |    | Cha |     |
| 5 | 115171406 | 115171406 |    | Jer |     |
| 5 | 115793651 | 115869934 |    | Jer |     |
| 5 | 116804850 | 116882796 |    | Ang |     |
| 6 | 449903    | 449903    |    | Ang |     |
| 6 | 878249    | 1303767   |    | Lim |     |
| 6 | 1405878   | 1604556   |    | Lim |     |
| 6 | 2883313   | 3217181   | ZT |     |     |
| 6 | 3358168   | 4231143   | ZT |     |     |
| 6 | 9558946   | 9746897   |    | Cha |     |
| 6 | 9850754   | 10287413  |    | Cha |     |
| 6 | 9941278   | 10147796  |    | Jer |     |
| 6 | 10671286  | 10958234  |    | Bro |     |
| 6 | 11053007  | 11287112  |    |     | Guz |
| 6 | 11656479  | 11704613  |    |     | Gir |
| 6 | 12490545  | 13266473  | ZT |     |     |
| 6 | 13857569  | 14030629  |    | Bro |     |
| 6 | 19155106  | 19187523  |    | Lim |     |
| 6 | 20095445  | 20139719  |    | Lim |     |
| 6 | 24034416  | 24342463  |    | Gue |     |
| 6 | 27927608  | 28277760  |    | Gue |     |
| 6 | 31081921  | 31081921  |    | Jer |     |
| 6 | 33450062  | 33712714  |    | Jer |     |
| 6 | 33450062  | 33833305  |    | Nor |     |
| 6 | 33642764  | 34076036  |    | Ang |     |
| 6 | 34195111  | 34195111  |    | Ang |     |
| 6 | 35242978  | 35461591  |    | Ang |     |
| 6 | 37908330  | 37975696  |    | Ang |     |
| 6 | 38774879  | 38774879  |    | Ang |     |
| 6 | 39309298  | 39623155  |    | Her |     |
| 6 | 41752613  | 42099998  |    | Hol |     |
| 6 | 43893795  | 44068558  |    | Ang |     |
| 6 | 44614641  | 44714358  |    | Cha |     |
| 6 | 46616748  | 46878129  |    | Her |     |
| 6 | 46820055  | 46878129  |    | Lim |     |
| 6 | 54759464  | 55199755  | ZT |     |     |
| 6 | 56079069  | 56143187  |    | Ang |     |
| 6 | 61590746  | 61892976  | ZT |     |     |
| 6 | 67190873  | 67190873  |    | Lim |     |
| 6 | 70777638  | 70777638  |    | Lim |     |
| 6 | 72198048  | 72253005  |    | Jer |     |
| 6 | 77085018  | 77770651  |    | Hol |     |
| 6 | 80251687  | 80338390  |    |     | Guz |
| 6 | 80455942  | 81821735  |    |     | Guz |
| 6 | 80574939  | 80789500  |    | Gue |     |
| 6 | 81481074  | 81946116  |    | Ang |     |
| 6 | 112611819 | 113194494 |    | Gue |     |

|   |           |           |    |     |     |
|---|-----------|-----------|----|-----|-----|
| 6 | 118252961 | 118649364 | ZT |     |     |
| 6 | 118281301 | 118353935 |    |     | Guz |
| 7 | 5426178   | 5695120   |    | Ang |     |
| 7 | 8304451   | 8304451   |    | Ang |     |
| 7 | 9003495   | 9182396   |    | Ang |     |
| 7 | 9112088   | 9182396   |    | Jer |     |
| 7 | 16886385  | 17033776  |    | Jer |     |
| 7 | 17340164  | 17567301  |    | Jer |     |
| 7 | 20289846  | 20289846  |    | Nor |     |
| 7 | 20479996  | 20685141  |    | Gue |     |
| 7 | 20786085  | 21599668  |    | Gue |     |
| 7 | 21198207  | 21542670  |    |     | Gir |
| 7 | 22566709  | 23078152  |    | Gue |     |
| 7 | 23016916  | 23156602  |    | Nor |     |
| 7 | 39224663  | 39408588  |    | Gue |     |
| 7 | 42319411  | 42319411  |    | Nor |     |
| 7 | 42437898  | 42736530  |    | Nor |     |
| 7 | 42858075  | 42858075  |    | Nor |     |
| 7 | 42963574  | 43230190  |    | Nor |     |
| 7 | 44034801  | 44108337  |    | Hol |     |
| 7 | 44682616  | 44805462  |    | Nor |     |
| 7 | 45816236  | 46263993  |    | Gue |     |
| 7 | 47371662  | 47371662  |    |     | Nel |
| 7 | 47506357  | 47950533  |    |     | Nel |
| 7 | 47559314  | 47559314  |    | Jer |     |
| 7 | 47950533  | 48078303  |    |     | Gir |
| 7 | 51131500  | 51273470  |    | Hol |     |
| 7 | 51375336  | 52080598  |    | Bro |     |
| 7 | 51375336  | 52080598  |    | Hol |     |
| 7 | 51456410  | 52080598  |    | Nor |     |
| 7 | 51626813  | 51710045  |    | Her |     |
| 7 | 51783465  | 52080598  |    | Ang |     |
| 7 | 52231298  | 52317683  |    | Ang |     |
| 7 | 52231298  | 52231298  |    | Bro |     |
| 7 | 52231298  | 52317683  |    | Her |     |
| 7 | 52231298  | 52563489  |    | Hol |     |
| 7 | 52231298  | 52317683  |    | Nor |     |
| 7 | 52684381  | 52836863  |    | Hol |     |
| 7 | 52836863  | 53402793  |    | Gue |     |
| 7 | 53498236  | 53627815  |    | Nor |     |
| 7 | 53627815  | 54144114  |    | Gue |     |
| 7 | 54334873  | 54590451  |    | Lim |     |
| 7 | 59180139  | 59704797  |    |     | Gir |
| 7 | 59314603  | 59910601  |    | Gue |     |
| 7 | 63973572  | 64468563  |    | Nor |     |
| 7 | 64685425  | 64764114  |    | Nor |     |
| 7 | 65205183  | 65242121  | ZT |     |     |
| 7 | 67345428  | 67435114  |    | Jer |     |

|   |           |           |    |     |     |
|---|-----------|-----------|----|-----|-----|
| 7 | 68772679  | 68772679  |    | Jer |     |
| 7 | 69919712  | 70148815  |    |     | Nel |
| 7 | 70313242  | 70391912  |    |     | Nel |
| 7 | 70935529  | 71042608  |    | Cha |     |
| 7 | 71977836  | 72085410  |    | Bro |     |
| 7 | 74662861  | 74746996  |    | Ang |     |
| 7 | 76242524  | 76242524  |    | Cha |     |
| 7 | 76352907  | 77027187  |    | Cha |     |
| 7 | 78730794  | 79072441  |    | Cha |     |
| 7 | 78993771  | 79072441  |    | Gue |     |
| 7 | 79286849  | 79286849  |    | Gue |     |
| 7 | 79286849  | 79286849  |    | Lim |     |
| 7 | 79394912  | 79511994  |    | Lim |     |
| 7 | 80505078  | 81051251  |    | Bro |     |
| 7 | 81180619  | 81399995  |    | Bro |     |
| 7 | 81422559  | 81550627  |    |     | Nel |
| 7 | 82745359  | 82948614  |    | Nor |     |
| 7 | 87481184  | 87681984  |    | Bro |     |
| 7 | 90378312  | 90534132  |    |     | Nel |
| 7 | 91842765  | 92286550  |    | Nor |     |
| 7 | 95472912  | 95674482  |    |     | Nel |
| 7 | 98598188  | 99371157  | ZT |     |     |
| 7 | 103016270 | 103294596 |    |     | Gir |
| 7 | 103457774 | 103499128 |    | Nor |     |
| 7 | 105168965 | 105530475 |    |     | Gir |
| 7 | 110297126 | 110297126 |    |     | Gir |
| 7 | 110415789 | 110637456 |    |     | Gir |
| 7 | 110714665 | 110931177 |    | Hol |     |
| 8 | 1317824   | 1572543   |    | Gue |     |
| 8 | 2948943   | 3489893   |    | Hol |     |
| 8 | 4744813   | 5580213   |    | Bro |     |
| 8 | 9467104   | 9753660   |    | Hol |     |
| 8 | 15446560  | 15612794  |    | Ang |     |
| 8 | 16933256  | 17043052  |    | Lim |     |
| 8 | 17777469  | 17946780  |    | Lim |     |
| 8 | 20893054  | 20893054  |    | Lim |     |
| 8 | 23344221  | 23619430  |    | Ang |     |
| 8 | 24014551  | 24188422  |    | Ang |     |
| 8 | 24732722  | 24842403  |    | Jer |     |
| 8 | 24807908  | 24842403  |    | Ang |     |
| 8 | 30585051  | 30644755  |    | Gue |     |
| 8 | 31754646  | 31801262  |    | Ang |     |
| 8 | 36656101  | 37085687  |    | Ang |     |
| 8 | 36928935  | 37022168  |    | Bro |     |
| 8 | 37491972  | 37771074  |    |     | Gir |
| 8 | 38166242  | 38250880  |    |     | Guz |
| 8 | 38166242  | 38206825  |    |     | Nel |
| 8 | 40238396  | 40532424  |    | Lim |     |

|   |           |           |     |     |
|---|-----------|-----------|-----|-----|
| 8 | 43432019  | 43591156  | Bro |     |
| 8 | 47115955  | 47403730  | Nor |     |
| 8 | 49155564  | 49334308  | Ang |     |
| 8 | 53701338  | 53871305  | Nor |     |
| 8 | 54174761  | 54386837  | Bro |     |
| 8 | 55649349  | 56283438  | Bro |     |
| 8 | 55927704  | 56381952  | Ang |     |
| 8 | 55927704  | 55959006  | Her |     |
| 8 | 56322708  | 56452972  | Her |     |
| 8 | 59209410  | 59419670  |     | Guz |
| 8 | 59759811  | 59819259  | Bro |     |
| 8 | 60434020  | 60434020  | Jer |     |
| 8 | 60805803  | 60872538  | Her |     |
| 8 | 61741224  | 62123367  | Gue |     |
| 8 | 61865662  | 62123367  | Her |     |
| 8 | 62283927  | 62283927  | Gue |     |
| 8 | 62817801  | 62888898  |     | Nel |
| 8 | 63065209  | 63280979  |     | Nel |
| 8 | 63072645  | 63273121  | Gue |     |
| 8 | 63144428  | 63238470  | Her |     |
| 8 | 63238470  | 63370830  | Lim |     |
| 8 | 63320365  | 63708097  | Ang |     |
| 8 | 63504584  | 63661095  | Her |     |
| 8 | 68858661  | 69167651  |     | Gir |
| 8 | 69834960  | 70219718  |     | Guz |
| 8 | 71313642  | 71429865  |     | Nel |
| 8 | 72603211  | 72603211  | Bro |     |
| 8 | 75140241  | 75449229  | Nor |     |
| 8 | 76853364  | 77526328  | Her |     |
| 8 | 78221423  | 78458014  | Jer |     |
| 8 | 78221423  | 78318625  |     | Nel |
| 8 | 78453183  | 78453183  |     | Nel |
| 8 | 78556086  | 78556086  |     | Nel |
| 8 | 85262707  | 85546437  | Bro |     |
| 8 | 85435042  | 85657033  | Hol |     |
| 8 | 90378651  | 90427053  | Her |     |
| 8 | 91924906  | 91924906  | Her |     |
| 8 | 92369622  | 92513261  |     | Guz |
| 8 | 94358932  | 94358932  | Her |     |
| 8 | 94470215  | 94637822  | Her |     |
| 8 | 103695388 | 103741290 | Lim |     |
| 8 | 104300617 | 104507052 | Cha |     |
| 8 | 104614429 | 104719232 | Cha |     |
| 8 | 104824384 | 104824384 | Cha |     |
| 8 | 107733398 | 107830220 | Jer |     |
| 8 | 108350843 | 108514141 | Lim |     |
| 8 | 109611130 | 109693786 | Gue |     |
| 9 | 1402494   | 1402494   | Jer |     |

|   |          |          |     |     |
|---|----------|----------|-----|-----|
| 9 | 1503658  | 1587562  | Jer |     |
| 9 | 3494268  | 3706545  |     | Nel |
| 9 | 3544279  | 3684547  | Lim |     |
| 9 | 3796382  | 4191092  | Lim |     |
| 9 | 3817160  | 3817160  |     | Nel |
| 9 | 3847236  | 3940908  | Hol |     |
| 9 | 3926090  | 3926090  |     | Nel |
| 9 | 4033934  | 4158198  |     | Nel |
| 9 | 4305338  | 4362391  | Lim |     |
| 9 | 6980134  | 7316340  | Hol |     |
| 9 | 9688314  | 10071262 | Jer |     |
| 9 | 10492704 | 10555304 | Ang |     |
| 9 | 10761338 | 11187344 | Hol |     |
| 9 | 11079124 | 11145913 | Jer |     |
| 9 | 12909682 | 12987755 | Jer |     |
| 9 | 19937462 | 19995669 | Bro |     |
| 9 | 19995669 | 19995669 | Jer |     |
| 9 | 20123664 | 20309620 | Bro |     |
| 9 | 22107839 | 22169678 |     | Gir |
| 9 | 22232110 | 22452492 | Hol |     |
| 9 | 22554584 | 22554584 | Hol |     |
| 9 | 27666537 | 27882575 | Hol |     |
| 9 | 33348492 | 33391054 | Jer |     |
| 9 | 39183378 | 39451347 | Cha |     |
| 9 | 40436120 | 40664307 | Jer |     |
| 9 | 40964261 | 41291501 | Hol |     |
| 9 | 41399038 | 41746816 | Hol |     |
| 9 | 42556097 | 42767160 | Ang |     |
| 9 | 43081332 | 43229106 | Hol |     |
| 9 | 43229106 | 43421580 | Jer |     |
| 9 | 43527096 | 43643762 | Jer |     |
| 9 | 43563436 | 43877566 | Ang |     |
| 9 | 43995195 | 44166269 | Hol |     |
| 9 | 44269454 | 44269454 | Hol |     |
| 9 | 45602588 | 45767377 | Bro |     |
| 9 | 45784946 | 46299883 |     | Guz |
| 9 | 45867860 | 46118697 | Bro |     |
| 9 | 47986240 | 48062003 | Hol |     |
| 9 | 50586063 | 51244887 | Lim |     |
| 9 | 55574798 | 55750201 |     | Gir |
| 9 | 55857023 | 56152439 |     | Gir |
| 9 | 56266678 | 56393910 |     | Gir |
| 9 | 56349339 | 56411057 | Hol |     |
| 9 | 62015746 | 62153583 | Lim |     |
| 9 | 63452753 | 63452753 | Ang |     |
| 9 | 63574601 | 63574601 | Ang |     |
| 9 | 63676365 | 63676365 | Ang |     |
| 9 | 64800747 | 64905799 | Bro |     |

|    |           |           |     |     |
|----|-----------|-----------|-----|-----|
| 9  | 67156161  | 67206285  | Cha |     |
| 9  | 74249760  | 74601457  |     | Gir |
| 9  | 76300687  | 76346736  | Cha |     |
| 9  | 76706088  | 76772631  |     | Nel |
| 9  | 84535049  | 84535049  | Hol |     |
| 9  | 84901502  | 84973909  | Jer |     |
| 9  | 104855944 | 105303067 | Jer |     |
| 9  | 105376125 | 105531512 |     | Nel |
| 10 | 1506191   | 1927319   |     | Nel |
| 10 | 6583446   | 6644227   | Lim |     |
| 10 | 21663015  | 21663015  | Hol |     |
| 10 | 27828262  | 28125910  | Her |     |
| 10 | 30494266  | 30837912  | Gue |     |
| 10 | 30764887  | 30837912  | Bro |     |
| 10 | 30837912  | 30837912  | Jer |     |
| 10 | 30939474  | 30939474  | Gue |     |
| 10 | 30939474  | 30939474  | Jer |     |
| 10 | 31043847  | 31128138  | Ang |     |
| 10 | 31043847  | 31330749  | Gue |     |
| 10 | 31043847  | 31043847  | Jer |     |
| 10 | 38030548  | 38262598  | Bro |     |
| 10 | 38540164  | 38764506  | Bro |     |
| 10 | 41329885  | 41479100  | Hol |     |
| 10 | 41584872  | 41584872  | Hol |     |
| 10 | 42512119  | 42625497  | Cha |     |
| 10 | 44291217  | 44291217  | Bro |     |
| 10 | 44942502  | 45084424  | Nor |     |
| 10 | 45041722  | 45084424  | Bro |     |
| 10 | 45225775  | 45225775  | Bro |     |
| 10 | 45225775  | 45225775  | Nor |     |
| 10 | 45346828  | 45846534  | Bro |     |
| 10 | 45346828  | 45766891  | Nor |     |
| 10 | 45509686  | 45538277  | Hol |     |
| 10 | 48095531  | 48274876  | Nor |     |
| 10 | 49896490  | 50595507  | Bro |     |
| 10 | 58292569  | 58459047  | Her |     |
| 10 | 58563129  | 58563129  | Her |     |
| 10 | 61411012  | 61411012  |     | Nel |
| 10 | 61518236  | 61518236  |     | Nel |
| 10 | 65303032  | 65476239  | Jer |     |
| 10 | 70485481  | 70710371  | Ang |     |
| 10 | 70710371  | 70937071  | Gue |     |
| 10 | 70710371  | 70937071  | Nor |     |
| 10 | 70833294  | 71022679  | Hol |     |
| 10 | 70889383  | 71022679  | Jer |     |
| 10 | 70972920  | 71071718  | Bro |     |
| 10 | 71045263  | 71045263  | Ang |     |
| 10 | 73642900  | 73642900  | Jer |     |

|    |           |           |    |     |     |
|----|-----------|-----------|----|-----|-----|
| 10 | 73766212  | 73788411  |    |     | Nel |
| 10 | 75550002  | 75645682  |    | Nor |     |
| 10 | 77492297  | 77839926  |    | Cha |     |
| 10 | 78742465  | 78871653  |    | Ang |     |
| 10 | 78986607  | 78986607  |    | Ang |     |
| 10 | 79110275  | 79240420  |    | Ang |     |
| 10 | 79346962  | 79346962  |    | Ang |     |
| 10 | 79455690  | 79455690  |    | Ang |     |
| 10 | 79572452  | 79572452  |    | Ang |     |
| 10 | 82814483  | 83061813  |    | Her |     |
| 10 | 86353818  | 86353818  |    | Ang |     |
| 10 | 86519779  | 86691323  |    | Ang |     |
| 10 | 86592920  | 86592920  |    | Hol |     |
| 10 | 90367300  | 90367300  |    | Ang |     |
| 10 | 90847397  | 90902402  |    | Ang |     |
| 10 | 91464250  | 91500061  |    | Jer |     |
| 10 | 92073773  | 92073773  |    | Ang |     |
| 10 | 96885456  | 96885456  |    | Ang |     |
| 10 | 97259585  | 97356070  |    | Ang |     |
| 10 | 103217676 | 103398749 |    |     | Guz |
| 10 | 103578088 | 103698520 |    | Ang |     |
| 11 | 2779943   | 3050160   |    | Jer |     |
| 11 | 11993676  | 13090823  | ZT |     |     |
| 11 | 15790857  | 15790857  |    |     | Nel |
| 11 | 16914701  | 17253092  | ZT |     |     |
| 11 | 17360567  | 17716204  | ZT |     |     |
| 11 | 17796470  | 18117290  |    | Her |     |
| 11 | 18749323  | 18933896  |    |     | Guz |
| 11 | 21281912  | 21628948  |    | Hol |     |
| 11 | 32848500  | 32944087  |    | Her |     |
| 11 | 34269089  | 34366561  |    | Gue |     |
| 11 | 34474506  | 34620459  |    | Gue |     |
| 11 | 36614495  | 36703565  |    | Her |     |
| 11 | 41270304  | 41411065  |    |     | Gir |
| 11 | 41517065  | 41840880  |    |     | Gir |
| 11 | 42462274  | 42462274  |    | Jer |     |
| 11 | 43782801  | 43782801  |    |     | Nel |
| 11 | 44623029  | 44623029  |    | Jer |     |
| 11 | 44730405  | 44730405  |    | Jer |     |
| 11 | 46152936  | 46752152  |    |     | Guz |
| 11 | 47547123  | 47751475  |    | Hol |     |
| 11 | 49138061  | 49263389  |    | Hol |     |
| 11 | 49513395  | 49718366  |    | Hol |     |
| 11 | 52827981  | 53190924  |    | Jer |     |
| 11 | 54589952  | 54835002  |    | Hol |     |
| 11 | 55378041  | 55444756  |    | Ang |     |
| 11 | 57077011  | 57122357  |    | Nor |     |
| 11 | 57122357  | 57122357  |    | Ang |     |

|    |           |           |    |     |     |
|----|-----------|-----------|----|-----|-----|
| 11 | 57225773  | 57225773  |    | Ang |     |
| 11 | 57225773  | 57225773  |    | Nor |     |
| 11 | 57352654  | 57612186  |    | Ang |     |
| 11 | 57352654  | 57698139  |    | Nor |     |
| 11 | 57513633  | 57612186  |    | Jer |     |
| 11 | 57584865  | 57584865  |    |     | Nel |
| 11 | 57699190  | 57699190  |    |     | Nel |
| 11 | 58898410  | 58958613  |    |     | Nel |
| 11 | 60834800  | 60834800  |    | Jer |     |
| 11 | 60993402  | 60993402  |    | Jer |     |
| 11 | 61700872  | 61700872  |    |     | Nel |
| 11 | 61815063  | 62144546  |    |     | Guz |
| 11 | 61815063  | 62144546  |    |     | Nel |
| 11 | 62016830  | 62046170  |    | Jer |     |
| 11 | 62286261  | 62468836  |    |     | Guz |
| 11 | 62286261  | 62286261  |    |     | Nel |
| 11 | 62922969  | 63083499  |    |     | Guz |
| 11 | 63083499  | 63083499  |    |     | Nel |
| 11 | 71049841  | 71110237  |    | Cha |     |
| 11 | 72884873  | 73563924  |    |     | Nel |
| 11 | 75188485  | 75306027  |    | Cha |     |
| 11 | 77638200  | 77952883  |    | Cha |     |
| 11 | 82638082  | 83141013  |    | Her |     |
| 11 | 87324940  | 87517044  |    | Lim |     |
| 11 | 90834903  | 90834903  |    | Her |     |
| 11 | 92760660  | 92861686  |    |     | Nel |
| 11 | 93546324  | 93589025  |    | Jer |     |
| 11 | 94520855  | 94671637  |    | Lim |     |
| 11 | 95851888  | 96109177  |    | Ang |     |
| 11 | 95995955  | 96310082  |    | Lim |     |
| 11 | 96231754  | 96416913  |    | Jer |     |
| 11 | 96833927  | 97127235  |    | Lim |     |
| 11 | 96856553  | 97165214  |    |     | Nel |
| 11 | 97977371  | 98061774  |    |     | Gir |
| 11 | 98007989  | 98248695  |    |     | Nel |
| 11 | 99133796  | 99169226  |    | Jer |     |
| 11 | 102177393 | 102177393 |    | Jer |     |
| 12 | 7398      | 7398      | ZT |     |     |
| 12 | 855263    | 1185172   |    | Hol |     |
| 12 | 2411488   | 2555233   |    | Jer |     |
| 12 | 2555233   | 2644450   |    | Hol |     |
| 12 | 2709896   | 2840501   |    | Her |     |
| 12 | 3663510   | 3726470   |    | Jer |     |
| 12 | 5790823   | 5873762   |    | Ang |     |
| 12 | 9470495   | 9554780   |    | Nor |     |
| 12 | 11413972  | 11465252  |    |     | Gir |
| 12 | 11952739  | 12079648  |    | Jer |     |
| 12 | 12130438  | 12130438  |    | Her |     |



|    |          |          |    |     |     |
|----|----------|----------|----|-----|-----|
| 12 | 15637232 | 15812507 |    | Bro |     |
| 12 | 17652739 | 17777535 |    | Her |     |
| 12 | 17821920 | 17821920 |    | Nor |     |
| 12 | 18420344 | 18804912 |    | Her |     |
| 12 | 21108696 | 21215798 |    | Nor |     |
| 12 | 25821702 | 26728626 |    | Nor |     |
| 12 | 26091552 | 26687038 |    | Lim |     |
| 12 | 26415353 | 26474785 |    | Gue |     |
| 12 | 26474785 | 26820533 |    | Her |     |
| 12 | 28096664 | 28137445 |    | Jer |     |
| 12 | 31117625 | 31166171 |    |     | Gir |
| 12 | 32310451 | 32519161 |    |     | Guz |
| 12 | 34003865 | 34066603 |    | Nor |     |
| 12 | 34186079 | 34186079 |    | Nor |     |
| 12 | 35071458 | 35071458 |    | Her |     |
| 12 | 35505910 | 35760005 |    | Nor |     |
| 12 | 35860041 | 36004714 |    | Nor |     |
| 12 | 36034539 | 36034539 |    |     | Guz |
| 12 | 36327358 | 36580366 |    |     | Guz |
| 12 | 37594269 | 37748400 |    |     | Nel |
| 12 | 37871194 | 38222071 |    |     | Nel |
| 12 | 38351681 | 38351681 |    |     | Nel |
| 12 | 38541351 | 38541351 |    |     | Nel |
| 12 | 38708042 | 38708042 |    |     | Nel |
| 12 | 38811401 | 38811401 |    |     | Nel |
| 12 | 41831612 | 42072404 |    | Her |     |
| 12 | 46692520 | 46692520 |    |     | Guz |
| 12 | 47545150 | 47647948 |    | Lim |     |
| 12 | 52032001 | 52082569 |    | Jer |     |
| 12 | 56924171 | 57455552 |    |     | Guz |
| 12 | 57094160 | 57094160 |    |     | Nel |
| 12 | 57556609 | 57687027 |    |     | Guz |
| 12 | 61782214 | 61782214 |    | Gue |     |
| 12 | 70094561 | 70339877 | ZT |     |     |
| 12 | 70512846 | 70512846 | ZT |     |     |
| 12 | 70776064 | 70776064 | ZT |     |     |
| 12 | 71453071 | 71453071 | ZT |     |     |
| 12 | 72167314 | 72167314 | ZT |     |     |
| 12 | 72272866 | 72495671 | ZT |     |     |
| 12 | 73745994 | 73745994 | ZT |     |     |
| 12 | 75254804 | 75330903 | ZT |     |     |
| 12 | 76710313 | 76785743 | ZT |     |     |
| 12 | 76791869 | 76881130 |    | Nor |     |
| 12 | 80341071 | 80425016 |    | Gue |     |
| 13 | 3623556  | 3862870  |    | Gue |     |
| 13 | 11862167 | 11995413 |    | Cha |     |
| 13 | 12626523 | 12626523 |    | Her |     |
| 13 | 18962684 | 19024912 |    | Bro |     |

|    |          |          |     |     |
|----|----------|----------|-----|-----|
| 13 | 19004088 | 19201759 | Her |     |
| 13 | 23767720 | 24003859 | Bro |     |
| 13 | 26937127 | 26937127 | Jer |     |
| 13 | 27525398 | 28216775 | Cha |     |
| 13 | 34712301 | 34758845 |     | Nel |
| 13 | 35474541 | 35781279 |     | Nel |
| 13 | 36231773 | 36367627 |     | Nel |
| 13 | 39167826 | 39280645 | Hol |     |
| 13 | 42441984 | 42441984 | Hol |     |
| 13 | 43033627 | 43033627 | Gue |     |
| 13 | 43122300 | 43546670 | Bro |     |
| 13 | 46817491 | 47103769 |     | Gir |
| 13 | 49406229 | 49503637 | Bro |     |
| 13 | 50607191 | 50607191 | Jer |     |
| 13 | 50760200 | 50760200 |     | Gir |
| 13 | 50869402 | 51028725 |     | Gir |
| 13 | 54668408 | 54668408 |     | Gir |
| 13 | 55309919 | 55888683 | Her |     |
| 13 | 73752118 | 73752118 | Nor |     |
| 13 | 74455449 | 74455449 |     | Nel |
| 13 | 77996845 | 78056241 |     | Nel |
| 14 | 10350252 | 10396044 | Her |     |
| 14 | 11554484 | 11554484 | Nor |     |
| 14 | 11782284 | 12070404 |     | Guz |
| 14 | 12189249 | 12398318 |     | Guz |
| 14 | 12727219 | 13036902 | Jer |     |
| 14 | 24763610 | 24763610 | Her |     |
| 14 | 24869608 | 24939285 | Her |     |
| 14 | 26053531 | 26775878 | Her |     |
| 14 | 28062900 | 28159943 | Ang |     |
| 14 | 33192707 | 33303060 | Bro |     |
| 14 | 34280875 | 34371583 | Lim |     |
| 14 | 35801257 | 36075593 | Ang |     |
| 14 | 39067537 | 39067537 | Ang |     |
| 14 | 39184898 | 39581240 | Ang |     |
| 14 | 39658425 | 39884259 | Her |     |
| 14 | 40502641 | 40502641 | Lim |     |
| 14 | 41954479 | 42187575 | Bro |     |
| 14 | 42187575 | 42472189 | Jer |     |
| 14 | 46359424 | 46456216 | Bro |     |
| 14 | 46359424 | 46751517 | Lim |     |
| 14 | 49540290 | 49604994 | Lim |     |
| 14 | 49612207 | 49612207 |     | Nel |
| 14 | 49760299 | 49809387 | Lim |     |
| 14 | 49766006 | 49955911 |     | Nel |
| 14 | 50075470 | 50219196 |     | Nel |
| 14 | 50219196 | 50219196 |     | Guz |
| 14 | 51324497 | 51347339 | Jer |     |

|    |          |          |    |     |     |
|----|----------|----------|----|-----|-----|
| 14 | 52989072 | 54035518 |    |     | Guz |
| 14 | 53150040 | 53609912 |    | Her |     |
| 14 | 53193111 | 53609912 |    | Gue |     |
| 14 | 53332825 | 53438913 |    |     | Nel |
| 14 | 53550213 | 54035518 | ZT |     |     |
| 14 | 53683729 | 53872420 |    | Jer |     |
| 14 | 54175673 | 54300664 |    |     | Guz |
| 14 | 54175673 | 54231380 | ZT |     |     |
| 14 | 57167775 | 57217596 |    | Lim |     |
| 14 | 57678310 | 57888506 |    | Ang |     |
| 14 | 64451563 | 64504478 |    | Jer |     |
| 14 | 64451563 | 64757034 |    |     | Gir |
| 14 | 66332394 | 66549938 |    | Jer |     |
| 14 | 68588028 | 68820639 |    | Hol |     |
| 14 | 72531775 | 72675508 |    | Her |     |
| 14 | 73231262 | 73583478 |    | Her |     |
| 14 | 73755259 | 74135137 |    | Her |     |
| 15 | 541451   | 684098   |    | Hol |     |
| 15 | 607318   | 675523   |    |     | Gir |
| 15 | 4266078  | 4266078  |    | Lim |     |
| 15 | 5286282  | 5342417  |    | Nor |     |
| 15 | 10303535 | 10360514 |    |     | Nel |
| 15 | 10481071 | 10481071 |    |     | Nel |
| 15 | 11505690 | 11685734 |    | Cha |     |
| 15 | 14562911 | 14562911 |    | Hol |     |
| 15 | 17810751 | 17810751 |    | Hol |     |
| 15 | 27505692 | 27548079 |    | Ang |     |
| 15 | 28573894 | 28670202 |    | Lim |     |
| 15 | 30605734 | 30605734 |    | Jer |     |
| 15 | 35017416 | 35293898 |    | Her |     |
| 15 | 35664204 | 36080303 |    | Her |     |
| 15 | 36080303 | 36157938 |    |     | Guz |
| 15 | 36983921 | 37085321 |    | Nor |     |
| 15 | 41223589 | 41285121 |    | Her |     |
| 15 | 41367360 | 41498723 |    |     | Guz |
| 15 | 43000037 | 43039782 |    | Lim |     |
| 15 | 43613588 | 44076774 |    | Lim |     |
| 15 | 43644653 | 43644653 |    |     | Nel |
| 15 | 43779412 | 43912400 |    |     | Nel |
| 15 | 43884531 | 43996164 |    | Jer |     |
| 15 | 48782120 | 48822979 |    | Cha |     |
| 15 | 48861147 | 49064593 |    |     | Guz |
| 15 | 49245028 | 49245028 |    |     | Guz |
| 15 | 65071060 | 65270348 |    | Gue |     |
| 15 | 69157600 | 69445029 |    |     | Guz |
| 16 | 3970030  | 4027681  |    |     | Nel |
| 16 | 4235903  | 4598916  |    | Her |     |
| 16 | 12347163 | 12472290 |    | Her |     |

|    |          |          |    |     |     |
|----|----------|----------|----|-----|-----|
| 16 | 14277442 | 14329324 |    | Jer |     |
| 16 | 16039261 | 17069240 | ZT |     |     |
| 16 | 19740336 | 20450779 | ZT |     |     |
| 16 | 24776941 | 24845497 |    | Jer |     |
| 16 | 30107699 | 30107699 |    | Hol |     |
| 16 | 31019604 | 31139383 |    |     | Gir |
| 16 | 31473763 | 31548783 |    | Nor |     |
| 16 | 34638116 | 34968754 |    | Nor |     |
| 16 | 35049210 | 35634059 |    | Ang |     |
| 16 | 35220072 | 35220072 |    | Nor |     |
| 16 | 36476830 | 37151556 | ZT |     |     |
| 16 | 37180652 | 37298418 |    |     | Gir |
| 16 | 37194331 | 37254143 |    | Lim |     |
| 16 | 41368131 | 41453104 |    | Gue |     |
| 16 | 41572983 | 41572983 |    | Gue |     |
| 16 | 41678990 | 41775870 |    | Gue |     |
| 16 | 41700411 | 41790638 |    |     | Gir |
| 16 | 41888513 | 42364249 |    | Gue |     |
| 16 | 41899936 | 42048595 |    |     | Gir |
| 16 | 42537236 | 43096999 |    | Jer |     |
| 16 | 42608418 | 43529259 |    | Ang |     |
| 16 | 43272235 | 43623611 |    | Gue |     |
| 16 | 44269629 | 44644017 |    |     | Gir |
| 16 | 44863309 | 44863309 |    |     | Guz |
| 16 | 45473156 | 45630316 |    | Gue |     |
| 16 | 45473156 | 45630316 |    | Hol |     |
| 16 | 45549919 | 45549919 |    | Lim |     |
| 16 | 45736614 | 45736614 |    | Gue |     |
| 16 | 45736614 | 45984474 |    | Hol |     |
| 16 | 46085920 | 46141853 |    | Hol |     |
| 16 | 46592707 | 46950070 |    | Jer |     |
| 16 | 46677636 | 46724139 |    | Lim |     |
| 16 | 47172573 | 47258906 |    | Gue |     |
| 16 | 47507964 | 47570993 |    |     | Gir |
| 16 | 48258144 | 48421449 |    | Gue |     |
| 16 | 48619950 | 48884638 |    | Gue |     |
| 16 | 48711908 | 48867982 |    | Lim |     |
| 16 | 49863171 | 49978311 |    | Gue |     |
| 16 | 50535583 | 50783764 |    | Lim |     |
| 16 | 51305656 | 51973649 |    |     | Gir |
| 16 | 52023890 | 52161691 |    | Jer |     |
| 16 | 54046062 | 54301432 |    | Nor |     |
| 16 | 57111792 | 57174124 |    |     | Gir |
| 16 | 57465584 | 57556128 |    | Lim |     |
| 16 | 58190532 | 58471410 |    | Bro |     |
| 16 | 58272188 | 58400017 |    | Hol |     |
| 16 | 58359610 | 58837961 |    | Nor |     |
| 16 | 58938382 | 59182205 |    | Nor |     |

|    |          |          |    |     |     |
|----|----------|----------|----|-----|-----|
| 16 | 60430367 | 60470851 |    | Lim |     |
| 16 | 61757564 | 61980466 |    | Jer |     |
| 16 | 65313199 | 65313199 |    | Nor |     |
| 16 | 72778008 | 72778008 |    |     | Gir |
| 16 | 76224768 | 76384441 |    | Nor |     |
| 16 | 77946034 | 78278222 |    | Nor |     |
| 16 | 77961709 | 78059640 |    | Jer |     |
| 17 | 4791944  | 4791944  |    | Hol |     |
| 17 | 4791944  | 4967167  |    | Nor |     |
| 17 | 8512165  | 8575700  | ZT |     |     |
| 17 | 22354814 | 22354814 |    | Jer |     |
| 17 | 27654318 | 27732351 |    |     | Nel |
| 17 | 37763279 | 37822104 |    | Her |     |
| 17 | 40004303 | 40004303 |    | Jer |     |
| 17 | 58814396 | 58814396 |    | Nor |     |
| 17 | 65096190 | 65236429 |    | Nor |     |
| 17 | 66907233 | 66975172 |    | Jer |     |
| 17 | 68032148 | 68069561 |    | Ang |     |
| 17 | 69765254 | 69870054 |    | Ang |     |
| 17 | 73166013 | 73559752 |    | Her |     |
| 17 | 74674649 | 74769219 |    | Her |     |
| 17 | 74898756 | 74898756 |    | Her |     |
| 17 | 75044721 | 75044721 |    | Her |     |
| 18 | 6169342  | 6190185  |    | Her |     |
| 18 | 15724957 | 15724957 |    | Ang |     |
| 18 | 18167040 | 18347077 |    | Hol |     |
| 18 | 24421799 | 24770950 |    |     | Guz |
| 18 | 28035367 | 28265343 |    | Lim |     |
| 18 | 29435311 | 29898412 |    | Lim |     |
| 18 | 30759728 | 30784902 |    |     | Nel |
| 18 | 30918548 | 30918548 |    |     | Nel |
| 18 | 32039478 | 32197423 |    | Jer |     |
| 18 | 33851145 | 34129031 |    | Lim |     |
| 18 | 35033416 | 35187164 |    | Jer |     |
| 18 | 40446288 | 40789159 |    | Gue |     |
| 18 | 43109494 | 43510794 |    |     | Nel |
| 18 | 47444620 | 47613065 |    |     | Nel |
| 18 | 48040506 | 48227582 |    |     | Guz |
| 18 | 52288303 | 52429256 |    |     | Nel |
| 18 | 52701819 | 52764540 |    |     | Gir |
| 18 | 52900975 | 53320100 |    |     | Gir |
| 18 | 53439714 | 53537165 |    |     | Gir |
| 18 | 53638416 | 53638416 |    |     | Gir |
| 18 | 53753661 | 53915419 |    |     | Gir |
| 18 | 54394911 | 54573177 |    |     | Guz |
| 18 | 54704168 | 54704168 |    |     | Guz |
| 18 | 65911355 | 65985963 |    | Hol |     |
| 19 | 262485   | 262485   |    | Hol |     |

|    |          |          |     |     |
|----|----------|----------|-----|-----|
| 19 | 413710   | 413710   | Hol |     |
| 19 | 10671018 | 10712603 | Jer |     |
| 19 | 17759190 | 17777692 | Jer |     |
| 19 | 19675737 | 19781067 | Hol |     |
| 19 | 19970122 | 20088486 | Hol |     |
| 19 | 20830901 | 20830901 |     | Nel |
| 19 | 26060515 | 26087727 | Bro |     |
| 19 | 28277521 | 28312344 | Gue |     |
| 19 | 28507797 | 28799133 |     | Guz |
| 19 | 34016467 | 34081031 | Her |     |
| 19 | 34144101 | 34461281 | Hol |     |
| 19 | 35049942 | 35222595 | Jer |     |
| 19 | 44551095 | 44689047 |     | Guz |
| 19 | 44799390 | 44891730 |     | Guz |
| 19 | 47407572 | 47407572 | Ang |     |
| 19 | 51796076 | 51796076 | Lim |     |
| 20 | 3637677  | 4174779  |     | Gir |
| 20 | 4278244  | 4656931  |     | Gir |
| 20 | 8898757  | 8943192  |     | Guz |
| 20 | 11122063 | 11254640 |     | Guz |
| 20 | 14182164 | 14416570 | Hol |     |
| 20 | 16402419 | 16690385 | Gue |     |
| 20 | 20301638 | 20357937 | Jer |     |
| 20 | 20396411 | 20595893 | Lim |     |
| 20 | 27507810 | 27507810 |     | Guz |
| 20 | 30674472 | 30825893 | Nor |     |
| 20 | 30928803 | 30928803 | Nor |     |
| 20 | 31029524 | 31029524 | Nor |     |
| 20 | 31433472 | 31674164 | Nor |     |
| 20 | 31891078 | 32014836 | Her |     |
| 20 | 32498665 | 32498665 | Nor |     |
| 20 | 32633053 | 32874023 | Nor |     |
| 20 | 33446648 | 33537819 | Hol |     |
| 20 | 33490278 | 33537819 | Gue |     |
| 20 | 34022009 | 34474873 | Lim |     |
| 20 | 34414759 | 34414759 | Gue |     |
| 20 | 36017483 | 36416315 | Nor |     |
| 20 | 36324969 | 36375373 | Lim |     |
| 20 | 41389949 | 41580673 | Bro |     |
| 20 | 56689509 | 56718200 | Lim |     |
| 20 | 58525877 | 58587805 |     | Nel |
| 20 | 58692179 | 58692179 | Lim |     |
| 20 | 60612128 | 61616232 | Her |     |
| 20 | 61984638 | 62036376 | Lim |     |
| 20 | 62003414 | 62055493 | Hol |     |
| 20 | 70734693 | 70772846 |     | Gir |
| 20 | 70875830 | 71231949 |     | Gir |
| 20 | 71280563 | 71922138 | Jer |     |

|    |          |          |     |     |
|----|----------|----------|-----|-----|
| 20 | 71834868 | 71922138 | Her |     |
| 21 | 8725     | 8725     | Her |     |
| 21 | 8725     | 8725     | Hol |     |
| 21 | 8725     | 8725     | Jer |     |
| 21 | 204222   | 204222   | Her |     |
| 21 | 204222   | 204222   | Jer |     |
| 21 | 204222   | 204222   | Nor |     |
| 21 | 361318   | 361318   | Gue |     |
| 21 | 361318   | 361318   | Her |     |
| 21 | 361318   | 361318   | Jer |     |
| 21 | 361318   | 361318   | Nor |     |
| 21 | 504994   | 504994   | Gue |     |
| 21 | 504994   | 504994   | Her |     |
| 21 | 504994   | 504994   | Jer |     |
| 21 | 504994   | 504994   | Nor |     |
| 21 | 645376   | 645376   | Her |     |
| 21 | 645376   | 645376   | Jer |     |
| 21 | 645376   | 645376   | Nor |     |
| 21 | 774574   | 774574   | Her |     |
| 21 | 774574   | 774574   | Nor |     |
| 21 | 3561585  | 3653561  | Her |     |
| 21 | 3762262  | 4308308  | Her |     |
| 21 | 4411538  | 4411538  | Her |     |
| 21 | 5900058  | 5971363  | Nor |     |
| 21 | 6919205  | 7096541  | Nor |     |
| 21 | 7049776  | 7173321  | Bro |     |
| 21 | 8458546  | 8541959  | Bro |     |
| 21 | 10503457 | 10677966 | Ang |     |
| 21 | 13884396 | 13933435 | Hol |     |
| 21 | 14288138 | 14766834 | Bro |     |
| 21 | 14714185 | 14818540 | Ang |     |
| 21 | 14957433 | 15127073 |     | Gir |
| 21 | 16237693 | 16237693 | Jer |     |
| 21 | 16785248 | 16863723 | Jer |     |
| 21 | 16863723 | 16979042 | Gue |     |
| 21 | 18706352 | 18762361 |     | Nel |
| 21 | 19600565 | 19752873 | Bro |     |
| 21 | 19799240 | 19949845 | Hol |     |
| 21 | 22323904 | 22461853 | Lim |     |
| 21 | 22323904 | 22639853 | Nor |     |
| 21 | 22976563 | 23238454 | Bro |     |
| 21 | 24136096 | 24539045 | Bro |     |
| 21 | 24437617 | 24486885 |     | Nel |
| 21 | 24643755 | 24643755 | Bro |     |
| 21 | 25974504 | 26020647 | Jer |     |
| 21 | 29624611 | 29911323 | Bro |     |
| 21 | 30874989 | 31032359 | Gue |     |
| 21 | 31707051 | 31764616 | Bro |     |

|    |          |          |    |     |     |
|----|----------|----------|----|-----|-----|
| 21 | 31873638 | 32830315 |    | Bro |     |
| 21 | 34498778 | 34667353 |    | Nor |     |
| 21 | 41059072 | 41128918 |    |     | Nel |
| 21 | 43118544 | 43924035 |    | Hol |     |
| 21 | 43487945 | 43566426 |    |     | Nel |
| 21 | 44055266 | 44055266 |    | Hol |     |
| 21 | 44748769 | 44901335 |    |     | Gir |
| 21 | 45234173 | 45435950 |    | Lim |     |
| 21 | 45600155 | 45882200 |    |     | Gir |
| 21 | 45882200 | 45882200 |    |     | Nel |
| 21 | 47727421 | 47857951 |    | Jer |     |
| 21 | 47749318 | 48177959 |    | Cha |     |
| 21 | 48487618 | 48834422 |    | Jer |     |
| 21 | 49143093 | 49178133 |    |     | Guz |
| 21 | 59060143 | 59199306 |    | Ang |     |
| 21 | 60262849 | 60293487 |    |     | Nel |
| 21 | 64250367 | 64412250 |    | Gue |     |
| 21 | 67218872 | 67760359 |    |     | Guz |
| 21 | 68673095 | 68868534 |    |     | Guz |
| 21 | 68987919 | 68987919 |    |     | Guz |
| 21 | 69852429 | 70230072 | ZT |     |     |
| 22 | 638872   | 803110   |    | Hol |     |
| 22 | 1504583  | 1504583  | ZT |     |     |
| 22 | 1623884  | 1623884  | ZT |     |     |
| 22 | 11402326 | 11402326 |    | Gue |     |
| 22 | 11649808 | 11763239 |    | Lim |     |
| 22 | 14103245 | 14186222 |    | Lim |     |
| 22 | 16608311 | 16840205 |    |     | Gir |
| 22 | 19877407 | 20310645 |    | Bro |     |
| 22 | 22669066 | 23049830 |    | Cha |     |
| 22 | 23613510 | 23636256 |    | Bro |     |
| 22 | 24966558 | 25284841 |    | Her |     |
| 22 | 27869508 | 27944643 |    | Hol |     |
| 22 | 28052191 | 28110766 |    | Hol |     |
| 22 | 28725064 | 28875324 |    | Gue |     |
| 22 | 34370024 | 34664272 |    | Cha |     |
| 22 | 34784761 | 34986631 |    | Cha |     |
| 22 | 40654899 | 40711031 |    | Gue |     |
| 22 | 42030577 | 42250591 |    | Cha |     |
| 22 | 42599407 | 42647970 |    | Cha |     |
| 22 | 42749647 | 43246293 |    | Cha |     |
| 22 | 48211935 | 48272599 |    | Bro |     |
| 22 | 48866088 | 48866088 |    |     | Guz |
| 22 | 50199885 | 50474049 |    | Hol |     |
| 22 | 50349312 | 50432123 |    | Nor |     |
| 22 | 50637321 | 50809843 |    | Her |     |
| 22 | 50919853 | 51471443 |    | Her |     |
| 22 | 55958425 | 56128888 |    | Cha |     |



|    |          |          |    |     |     |
|----|----------|----------|----|-----|-----|
| 22 | 57153731 | 57284409 |    | Cha |     |
| 22 | 61312492 | 61312492 |    |     | Gir |
| 23 | 10121    | 10121    |    |     | Gir |
| 23 | 139285   | 139285   |    |     | Gir |
| 23 | 301633   | 301633   |    |     | Gir |
| 23 | 428745   | 503014   |    |     | Gir |
| 23 | 732008   | 844112   |    | Hol |     |
| 23 | 5609998  | 5657236  |    |     | Guz |
| 23 | 5753208  | 5753208  |    |     | Nel |
| 23 | 5861179  | 5861179  |    |     | Nel |
| 23 | 9661692  | 9852730  |    |     | Nel |
| 23 | 10858794 | 11094059 |    |     | Nel |
| 23 | 11566720 | 11889590 |    |     | Guz |
| 23 | 11999280 | 12062277 |    |     | Guz |
| 23 | 12177758 | 12384489 |    | Hol |     |
| 23 | 13997275 | 14111515 |    |     | Guz |
| 23 | 18964952 | 19215320 |    | Bro |     |
| 23 | 24242547 | 25248392 | ZT |     |     |
| 23 | 24392637 | 24939249 |    | Cha |     |
| 23 | 25449663 | 25574353 | ZT |     |     |
| 23 | 25859762 | 25859762 | ZT |     |     |
| 23 | 26711242 | 27665155 | ZT |     |     |
| 23 | 27776739 | 28435313 | ZT |     |     |
| 23 | 28571770 | 28957304 | ZT |     |     |
| 23 | 28952482 | 29024901 |    | Lim |     |
| 23 | 29078825 | 29675638 | ZT |     |     |
| 23 | 29148829 | 29304816 |    | Lim |     |
| 23 | 29831845 | 31194961 | ZT |     |     |
| 23 | 30015495 | 30939191 |    | Ang |     |
| 23 | 30163726 | 30446125 |    | Lim |     |
| 23 | 30777345 | 30977659 |    | Her |     |
| 23 | 31895767 | 31978264 |    |     | Nel |
| 23 | 32608468 | 33237258 | ZT |     |     |
| 23 | 32973497 | 33308775 |    | Cha |     |
| 23 | 36707756 | 36787506 |    |     | Nel |
| 23 | 40660798 | 40684631 |    | Hol |     |
| 24 | 154231   | 154231   |    | Gue |     |
| 24 | 439276   | 439276   |    | Gue |     |
| 24 | 595437   | 918703   |    | Gue |     |
| 24 | 643511   | 809504   |    | Hol |     |
| 24 | 9076993  | 9208956  |    | Nor |     |
| 24 | 11671411 | 12035684 |    | Cha |     |
| 24 | 14120858 | 14120858 |    |     | Guz |
| 24 | 14222578 | 14437894 |    |     | Guz |
| 24 | 20313385 | 20364536 |    |     | Nel |
| 24 | 20477264 | 20797489 |    |     | Nel |
| 24 | 20572058 | 20928280 |    |     | Gir |
| 24 | 21269616 | 21432906 |    | Cha |     |

|    |          |          |     |     |
|----|----------|----------|-----|-----|
| 24 | 24925791 | 25369456 |     | Guz |
| 24 | 25475807 | 25751740 |     | Guz |
| 24 | 25751740 | 25968172 | Gue |     |
| 24 | 25820839 | 25874297 | Jer |     |
| 24 | 30934156 | 30978136 | Cha |     |
| 24 | 31650946 | 31869672 | Ang |     |
| 24 | 42101894 | 42101894 |     | Nel |
| 24 | 42232650 | 42500735 |     | Nel |
| 24 | 42623754 | 42689753 |     | Nel |
| 24 | 46653518 | 46761421 | Ang |     |
| 24 | 48203225 | 48630311 | Nor |     |
| 24 | 60807235 | 60879053 | Lim |     |
| 24 | 61185652 | 61423980 | Lim |     |
| 24 | 61892167 | 61892167 | Lim |     |
| 24 | 61968531 | 62004962 |     | Nel |
| 24 | 62182152 | 62261855 | Lim |     |
| 24 | 62580288 | 62580288 | Cha |     |
| 25 | 3405842  | 3465726  | Jer |     |
| 25 | 4248368  | 4309238  | Jer |     |
| 25 | 6091348  | 6091348  |     | Nel |
| 25 | 8152490  | 8371682  | Cha |     |
| 25 | 10628650 | 10628650 |     | Guz |
| 25 | 10735504 | 10735504 |     | Guz |
| 25 | 12252170 | 12303617 |     | Guz |
| 25 | 13405791 | 13571593 | Lim |     |
| 25 | 21583665 | 21666132 | Her |     |
| 25 | 22370742 | 22514409 | Lim |     |
| 25 | 22812917 | 23081592 |     | Guz |
| 25 | 22969428 | 23104348 |     | Nel |
| 25 | 23210540 | 23210540 |     | Nel |
| 25 | 24671209 | 24836724 |     | Nel |
| 25 | 29690882 | 29690882 | Her |     |
| 25 | 37676059 | 37867138 |     | Nel |
| 25 | 40674489 | 40714999 |     | Nel |
| 26 | 3586610  | 3586610  | Jer |     |
| 26 | 4783644  | 4783644  | Jer |     |
| 26 | 4891430  | 5141217  |     | Nel |
| 26 | 6161663  | 6619517  | Bro |     |
| 26 | 10339734 | 10538894 |     | Gir |
| 26 | 22288463 | 22288463 | Lim |     |
| 26 | 22390438 | 22390438 | Lim |     |
| 26 | 22501867 | 22558692 | Lim |     |
| 26 | 25585089 | 25641218 | Lim |     |
| 26 | 26411617 | 26433407 | Her |     |
| 26 | 30218417 | 30251629 |     | Nel |
| 26 | 30900459 | 30954376 |     | Nel |
| 26 | 39027844 | 39217448 | Cha |     |
| 26 | 39331767 | 39706525 | Cha |     |

|    |          |          |    |     |     |
|----|----------|----------|----|-----|-----|
| 26 | 39748287 | 39780004 |    | Jer |     |
| 26 | 40698893 | 40733253 |    | Cha |     |
| 26 | 42953022 | 43226269 |    | Cha |     |
| 26 | 45786773 | 45786773 |    | Jer |     |
| 26 | 46348285 | 46403318 |    | Her |     |
| 26 | 46663802 | 47234109 | ZT |     |     |
| 26 | 46685978 | 47706414 |    | Cha |     |
| 26 | 51117232 | 51358645 |    | Cha |     |
| 27 | 3314120  | 3486378  |    | Cha |     |
| 27 | 3596438  | 3625884  |    |     | Nel |
| 27 | 6901933  | 7002026  |    | Hol |     |
| 27 | 14898244 | 15044426 |    | Hol |     |
| 27 | 18008818 | 18008818 |    | Ang |     |
| 27 | 18108993 | 18265385 |    | Ang |     |
| 27 | 18402344 | 18402344 |    | Ang |     |
| 27 | 18506025 | 18506025 |    | Ang |     |
| 27 | 18663778 | 18692965 |    | Hol |     |
| 27 | 18947023 | 18947023 |    |     | Nel |
| 27 | 19508946 | 19749943 |    | Her |     |
| 27 | 19861211 | 20138705 |    | Her |     |
| 27 | 20372030 | 20504395 |    | Ang |     |
| 27 | 24615175 | 24709555 |    | Ang |     |
| 27 | 30006323 | 30006323 |    | Lim |     |
| 27 | 31259957 | 31462506 |    | Lim |     |
| 27 | 32813604 | 32986416 |    | Gue |     |
| 27 | 34692151 | 34777867 |    |     | Nel |
| 27 | 36000462 | 36208029 |    |     | Nel |
| 28 | 471788   | 471788   |    |     | Guz |
| 28 | 999093   | 1148363  |    | Her |     |
| 28 | 3424089  | 3720220  |    | Ang |     |
| 28 | 6730869  | 6730869  |    | Nor |     |
| 28 | 7051126  | 7186023  |    | Bro |     |
| 28 | 9046486  | 9160211  |    | Lim |     |
| 28 | 9695595  | 9852321  |    | Gue |     |
| 28 | 19371256 | 19932570 |    | Her |     |
| 28 | 25949221 | 26144471 |    | Jer |     |
| 28 | 30113999 | 30207706 |    |     | Nel |
| 28 | 35113955 | 35216536 |    | Her |     |
| 28 | 35362739 | 35566652 |    | Cha |     |
| 28 | 35362739 | 35566652 |    | Her |     |
| 28 | 35692135 | 35945282 |    | Cha |     |
| 28 | 35692135 | 35778958 |    | Her |     |
| 28 | 37238317 | 37394869 |    | Cha |     |
| 28 | 40102528 | 40102528 |    | Jer |     |
| 28 | 40920166 | 40964508 |    | Ang |     |
| 29 | 8136855  | 8196100  |    | Bro |     |
| 29 | 11803793 | 11984964 |    | Lim |     |
| 29 | 19170744 | 19287565 |    | Her |     |

|    |          |          |     |     |
|----|----------|----------|-----|-----|
| 29 | 19992231 | 19992231 | Cha |     |
| 29 | 25144872 | 25202432 | Her |     |
| 29 | 26751704 | 26827353 |     | Guz |
| 29 | 28041906 | 28087498 |     | Gir |
| 29 | 29219049 | 29547625 |     | Gir |
| 29 | 30100272 | 30201805 | Hol |     |
| 29 | 30405864 | 30472536 | Hol |     |
| 29 | 40823987 | 41149594 | Nor |     |
| 29 | 41745163 | 41841952 | Bro |     |
| 29 | 42677448 | 43098226 | Nor |     |
| 29 | 46514979 | 46607724 | Jer |     |
| 29 | 46776296 | 46834374 |     | Gir |
| 29 | 48006213 | 48100160 |     | Guz |
| 29 | 48963532 | 49024179 |     | Guz |
| 29 | 49132446 | 49132446 |     | Guz |
